# Supplementary material for: Copper-catalyzed three-component oxycyanation of alkenes
Source: Royal Society of Chemistry journal article supplement (doi:10.1039/d0qo01437k), 2020-12-25
Supplement: d0qo01437k1.pdf [file d0qo01437k1.pdf]

## Supporting Information for

# Copper-Catalyzed Three-component Oxycyanation of Alkenes

Yuehua Zeng,<sup>a</sup> Yajun Li,<sup>a</sup> Daqi Lv<sup>a</sup> and Hongli Bao\*<sup>a,b</sup>

<sup>a</sup> Key Laboratory of Coal to Ethylene Glycol and Its Related Technology, State Key Laboratory of Structural Chemistry, Center for Excellence in Molecular Synthesis, Fujian Institute of Research on the Structure of Matter, Chinese Academy of Sciences, 155 Yangqiao Road West, Fuzhou, Fujian 350002, P. R. of China.

<sup>b</sup> University of Chinese Academy of Sciences, Beijing, 100049, P. R. of China.

## Table of content

|                                                    |    |
|----------------------------------------------------|----|
| Materials and methods.....                         | 3  |
| Synthesis of diacyl peroxides .....                | 4  |
| General procedure .....                            | 5  |
| Characterization data for products.....            | 6  |
| Transformations of the oxycyanation products ..... | 17 |
| 1. Synthesis of compound 8.....                    | 17 |
| 2. Synthesis of compound 9.....                    | 17 |
| 3. Synthesis of compound 10.....                   | 18 |
| Mechanism studies .....                            | 19 |
| 1. Radical trapping experiments .....              | 19 |
| 2. Ring-opening experiment .....                   | 20 |
| Asymmetric oxycyanation.....                       | 21 |
| Single crystal data of ( <i>R</i> )-4e .....       | 29 |
| References .....                                   | 31 |
| NMR spectra.....                                   | 32 |

## Materials and methods

All reactions were carried out under an atmosphere of nitrogen in glassware with magnetic stirring unless otherwise indicated. Commercially obtained reagents were used as received. Solvents were dried by Inert PureSolv MD5. Liquids and solutions were transferred via syringe. All reactions were monitored by thin-layer chromatography.  $^1\text{H}$  and  $^{13}\text{C}$  NMR spectra were recorded on Bruker-BioSpin AVANCE III HD. Data for  $^1\text{H}$  NMR spectra are reported relative to chloroform as an internal standard (7.26 ppm) and are reported as follows: chemical shift (ppm), multiplicity, coupling constant (Hz), and integration. Data for  $^{13}\text{C}$  NMR spectra are reported relative to chloroform as an internal standard (77.23 ppm) and are reported in terms of chemical shift (ppm). HRMS data were recorded on Bruker Impact II UHR-TOF, Waters Micromass GCT Premier or Thermo Fisher Scientific LTQ FT Ultra. IR data were obtained from Bruker VERTEX 70. GC-MS data were recorded on Thermo ISQ QD. High performance liquid chromatography (HPLC) analysis was performed on chiral columns. Optical rotations were measured in the solvent indicated.

## Synthesis of diacyl peroxides

*Caution: Diacyl peroxides and peresters have potentials to explode. Any diacyl peroxide involved reaction (as product or substrate) should be carried out with precautions!*

Benzoyl peroxide (BPO) **2a** was purchased from Adamas. Other peroxides were prepared according to our previous work.<sup>1</sup>

## General procedure

To a flame-dried Schlenk tube with a stirring bar were added  $\text{Cu}(\text{CH}_3\text{CN})_4\text{PF}_6$  (5 mol %), 1,10-Phen (7 mol %), BPO (0.75 mmol, 1.5 equiv), TFEA (0.5 mL), TMSCN (1.0 mmol, 2 equiv), and styrene (0.5 mmol, 1 equiv) sequentially under the nitrogen atmosphere. The reaction mixture was heated at 50 °C for 24 hours, and then was cooled to room temperature. The solvent was removed by rotary evaporation under vacuum and the residue was chromatographed on silica gel (petroleum ether/ethyl acetate = 10:1~3:1) to yield the desired product.

## Characterization data for products

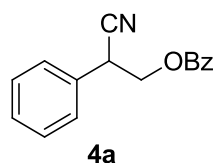

Following the general procedure, product **4a** was obtained as a colorless liquid (102 mg, 81% yield).  $^1\text{H}$  NMR (400 MHz,  $\text{CDCl}_3$ )  $\delta$  8.10 – 8.03 (m, 2H), 7.60 (t,  $J = 7.4$  Hz, 1H), 7.50 – 7.41 (m, 6H), 7.41 – 7.37 (m, 1H), 4.67 (dd,  $J = 10.9, 5.6$  Hz, 1H), 4.52 (dd,  $J = 10.9, 8.5$  Hz, 1H), 4.32 (dd,  $J = 8.5, 5.6$  Hz, 1H).  $^{13}\text{C}$  NMR (100 MHz,  $\text{CDCl}_3$ )  $\delta$  165.89, 133.59, 131.49, 129.82, 129.39, 129.08, 128.98, 128.57, 127.80, 118.51, 65.50, 37.58. IR (thin film):  $\nu$  2248, 1720  $\text{cm}^{-1}$ . HRMS (ESI) calcd for  $[\text{C}_{16}\text{H}_{13}\text{NNaO}_2]^+$  ( $[\text{M}+\text{Na}]^+$ ): 274.0844, found: 274.0839.

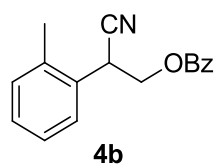

Following the general procedure, product **4b** was obtained as a yellow liquid (70 mg, 53% yield).  $^1\text{H}$  NMR (400 MHz,  $\text{CDCl}_3$ )  $\delta$  8.13 – 8.04 (m, 2H), 7.63 – 7.51 (m, 2H), 7.46 (dd,  $J = 8.4, 7.1$  Hz, 2H), 7.28 (dd,  $J = 5.7, 3.4$  Hz, 2H), 7.251 – 7.218 (m, 1H), 4.64 (dd,  $J = 10.5, 4.8$  Hz, 1H), 4.50 (dd,  $J = 9.1, 4.8$  Hz, 1H), 4.42 (dd,  $J = 10.5, 9.1$  Hz, 1H), 2.44 (s, 3H).  $^{13}\text{C}$  NMR (100 MHz,  $\text{CDCl}_3$ )  $\delta$  166.05, 135.74, 133.62, 131.29, 129.85, 129.68, 129.12, 129.06, 128.59, 128.12, 127.11, 119.05, 64.36, 34.62, 19.16. IR (thin film):  $\nu$  2247, 1724  $\text{cm}^{-1}$ . HRMS (ESI) calcd for  $[\text{C}_{17}\text{H}_{15}\text{NNaO}_2]^+$  ( $[\text{M}+\text{Na}]^+$ ): 288.1000, found: 288.0995.

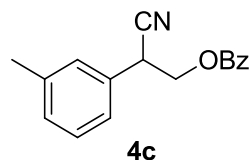

Following the general procedure, product **4c** was obtained as a yellow liquid (73 mg, 55% yield).  $^1\text{H}$  NMR (400 MHz,  $\text{CDCl}_3$ )  $\delta$  8.06 (d,  $J = 7.6$  Hz, 2H), 7.62 – 7.55 (m, 1H), 7.45 (t,  $J = 7.7$  Hz, 2H), 7.30 (t,  $J = 7.5$  Hz, 1H), 7.27 – 7.21 (m, 2H), 7.19 (d,  $J = 7.5$  Hz, 1H), 4.64 (dd,  $J = 10.9, 5.6$  Hz, 1H), 4.49 (dd,  $J = 10.9, 8.7$  Hz, 1H), 4.28 (dd,  $J = 8.7, 5.5$  Hz, 1H), 2.37 (s, 3H).  $^{13}\text{C}$  NMR (100 MHz,  $\text{CDCl}_3$ )  $\delta$  165.90, 139.30, 133.58, 131.35, 129.83, 129.70, 129.24, 129.14, 128.56, 128.47, 124.85, 118.68,

65.57, 37.51, 21.36. IR (thin film):  $\nu$  2247, 1724  $\text{cm}^{-1}$ . HRMS (ESI) calcd for  $[\text{C}_{17}\text{H}_{15}\text{NNaO}_2]^+$  ( $[\text{M}+\text{Na}]^+$ ): 288.1000, found: 288.0996.

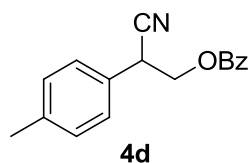

Following the general procedure, product **4d** was obtained as a colorless liquid (57 mg, 43% yield).  $^1\text{H}$  NMR (400 MHz,  $\text{CDCl}_3$ )  $\delta$  8.06 (dd,  $J = 8.4, 1.4$  Hz, 2H), 7.66 – 7.55 (m, 1H), 7.45 (dd,  $J = 8.4, 7.2$  Hz, 2H), 7.33 (d,  $J = 8.1$  Hz, 2H), 7.22 (d,  $J = 7.9$  Hz, 2H), 4.63 (dd,  $J = 10.9, 5.6$  Hz, 1H), 4.49 (dd,  $J = 10.9, 8.5$  Hz, 1H), 4.28 (dd,  $J = 8.5, 5.6$  Hz, 1H), 2.36 (s, 3H).  $^{13}\text{C}$  NMR (100 MHz,  $\text{CDCl}_3$ )  $\delta$  165.90, 138.91, 133.56, 130.03, 129.83, 129.15, 128.56, 128.46, 127.66, 118.72, 65.59, 37.22, 21.14. IR (thin film):  $\nu$  2247, 1724  $\text{cm}^{-1}$ . HRMS (ESI) calcd for  $[\text{C}_{17}\text{H}_{15}\text{NNaO}_2]^+$  ( $[\text{M}+\text{Na}]^+$ ): 288.1000, found: 288.0995.

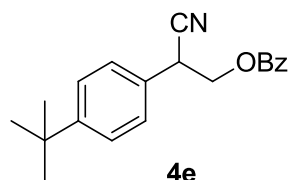

Following the general procedure, product **4e** was obtained as a white solid (101 mg, 66% yield).  $^1\text{H}$  NMR (400 MHz,  $\text{CDCl}_3$ )  $\delta$  8.13 – 8.01 (m, 2H), 7.60 (t,  $J = 7.5$  Hz, 1H), 7.51 – 7.42 (m, 4H), 7.42 – 7.37 (m, 2H), 4.67 (dd,  $J = 10.9, 5.5$  Hz, 1H), 4.50 (dd,  $J = 10.9, 8.7$  Hz, 1H), 4.32 (dd,  $J = 8.8, 5.5$  Hz, 1H), 1.34 (s, 9H).  $^{13}\text{C}$  NMR (100 MHz,  $\text{CDCl}_3$ )  $\delta$  165.92, 152.12, 133.56, 129.84, 129.19, 128.57, 128.43, 127.53, 126.34, 118.75, 65.60, 37.14, 34.69, 31.26. IR (thin film):  $\nu$  2248, 1725  $\text{cm}^{-1}$ . HRMS (ESI) calcd for  $[\text{C}_{20}\text{H}_{21}\text{NNaO}_2]^+$  ( $[\text{M}+\text{Na}]^+$ ): 330.1470, found: 330.1463.

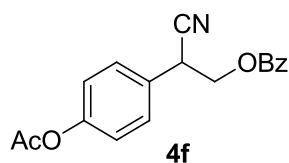

Following the general procedure, product **4f** was obtained as a yellow liquid (102 mg, 66% yield).  $^1\text{H}$  NMR (400 MHz,  $\text{CDCl}_3$ )  $\delta$  8.22 – 7.96 (m, 2H), 7.71 – 7.54 (m, 1H), 7.484 – 7.435 (m, 4H), 7.16 (d,  $J = 8.6$  Hz, 2H), 4.65 (dd,  $J = 10.9, 5.6$  Hz, 1H), 4.50 (dd,  $J = 11.0, 8.4$  Hz, 1H), 4.33 (dd,  $J = 8.4, 5.6$  Hz, 1H), 2.30 (s, 3H).  $^{13}\text{C}$  NMR (100 MHz,  $\text{CDCl}_3$ )  $\delta$  169.19, 165.86, 151.06, 133.64, 129.82, 129.01, 128.99, 128.59, 122.65, 118.32, 65.37, 37.01, 21.10. IR (thin film):  $\nu$  2248, 1724  $\text{cm}^{-1}$ . HRMS (ESI) calcd for  $[\text{C}_{18}\text{H}_{15}\text{NNaO}_4]^+$  ( $[\text{M}+\text{Na}]^+$ ): 332.0899, found: 332.0892.

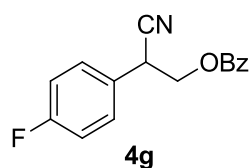

Following the general procedure, product **4g** was obtained as a yellow liquid (90 mg, 67% yield).  $^1\text{H}$  NMR (400 MHz,  $\text{CDCl}_3$ )  $\delta$  8.08 – 8.01 (m, 2H), 7.60 (t,  $J = 7.4$  Hz, 1H), 7.52 – 7.39 (m, 4H),  $\delta$  7.12 (t,  $J = 8.5$  Hz, 2H), 4.64 (dd,  $J = 11.0, 5.7$  Hz, 1H), 4.51 (dd,  $J = 11.0, 8.2$  Hz, 1H), 4.31 (dd,  $J = 8.2, 5.7$  Hz, 1H).  $^{13}\text{C}$  NMR (100 MHz,  $\text{CDCl}_3$ )  $\delta$  165.84, 162.91 (d,  $J = 248.9$  Hz), 133.67, 129.80, 129.61 (d,  $J = 8.4$  Hz), 128.95, 128.60, 127.36 (d,  $J = 3.5$  Hz), 118.30, 116.47 (d,  $J = 22.0$  Hz), 65.35 (d,  $J = 1.1$  Hz), 36.86. IR (thin film):  $\nu$  2248, 1724  $\text{cm}^{-1}$ . HRMS (ESI) calcd for  $[\text{C}_{16}\text{H}_{12}\text{FNNaO}_2]^+$  ( $[\text{M}+\text{Na}]^+$ ): 292.0750, found: 292.0744.

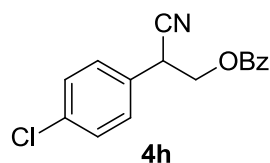

Following the general procedure, product **4h** was obtained as a colorless liquid (88 mg, 62% yield).  $^1\text{H}$  NMR (400 MHz,  $\text{CDCl}_3$ )  $\delta$  8.03 (dd,  $J = 8.3, 1.4$  Hz, 2H), 7.59 (t,  $J = 7.4$  Hz, 1H), 7.45 (dd,  $J = 8.4, 7.2$  Hz, 2H), 7.41-7.37 (m, 4H), 4.63 (dd,  $J = 10.9, 5.7$  Hz, 1H), 4.51 (dd,  $J = 10.9, 8.0$  Hz, 1H), 4.30 (dd,  $J = 8.0, 5.7$  Hz, 1H).  $^{13}\text{C}$  NMR (100 MHz,  $\text{CDCl}_3$ )  $\delta$  165.79, 135.09, 133.69, 130.11, 129.80, 129.60, 129.18, 128.93, 128.62, 118.12, 65.20, 36.97. IR (thin film):  $\nu$  2248, 1723  $\text{cm}^{-1}$ . HRMS (ESI) calcd for  $[\text{C}_{16}\text{H}_{12}\text{ClNNaO}_2]^+$  ( $[\text{M}+\text{Na}]^+$ ): 308.0454, found: 308.0451.

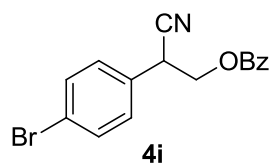

Following the general procedure, product **4i** was obtained as a yellow liquid (87 mg, 53% yield).  $^1\text{H}$  NMR (400 MHz,  $\text{CDCl}_3$ )  $\delta$  7.99 – 7.93 (m, 2H), 7.57 – 7.45 (m, 3H), 7.39 (t,  $J = 7.7$  Hz, 2H), 7.25 (d,  $J = 8.4$  Hz, 2H), 4.56 (dd,  $J = 11.0, 5.7$  Hz, 1H), 4.44 (dd,  $J = 10.9, 8.0$  Hz, 1H), 4.21 (dd,  $J = 8.0, 5.7$  Hz, 1H).  $^{13}\text{C}$  NMR (100 MHz,  $\text{CDCl}_3$ )  $\delta$  165.81, 133.70, 132.58, 130.59, 129.81, 129.45, 128.90, 128.62, 123.22, 118.00, 65.12, 37.07. IR (thin film):  $\nu$  2248, 1723  $\text{cm}^{-1}$ . HRMS (ESI) calcd for  $[\text{C}_{16}\text{H}_{12}\text{BrNNaO}_2]^+$  ( $[\text{M}+\text{Na}]^+$ ): 351.9949, found: 351.9944.



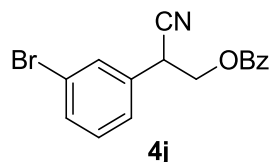

Following the general procedure, product **4j** was obtained as a yellow liquid (105 mg, 64% yield).  $^1\text{H}$  NMR (400 MHz,  $\text{CDCl}_3$ )  $\delta$  8.07 – 8.01 (m, 2H), 7.68 – 7.57 (m, 2H), 7.551 – 7.524 (m, 1H), 7.47 (t,  $J = 7.7$  Hz, 2H), 7.4415 – 7.388 (m, 1H), 7.31 (t,  $J = 7.9$  Hz, 1H), 4.66 (dd,  $J = 10.9, 5.7$  Hz, 1H), 4.52 (dd,  $J = 10.9, 8.2$  Hz, 1H), 4.30 (dd,  $J = 8.2, 5.6$  Hz, 1H).  $^{13}\text{C}$  NMR (100 MHz,  $\text{CDCl}_3$ )  $\delta$  165.80, 133.70, 133.64, 132.25, 130.98, 130.89, 129.82, 128.89, 128.62, 126.43, 123.33, 117.85, 65.16, 37.11. IR (thin film):  $\nu$  2248, 1721  $\text{cm}^{-1}$ . HRMS (ESI) calcd for  $[\text{C}_{16}\text{H}_{12}\text{BrNNaO}_2]^+$  ( $[\text{M}+\text{Na}]^+$ ): 351.9949, found: 351.9945.

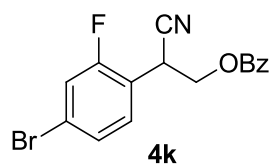

Following the general procedure, product **4k** was obtained as a yellow liquid (97 mg, 56% yield).  $^1\text{H}$  NMR (400 MHz,  $\text{CDCl}_3$ )  $\delta$  8.02 (dd,  $J = 8.4, 1.4$  Hz, 2H), 7.63 – 7.55 (m, 1H), 7.45 (t,  $J = 7.7$  Hz, 3H), 7.38 (dd,  $J = 8.5, 1.8$  Hz, 1H), 7.32 (dd,  $J = 9.5, 1.9$  Hz, 1H), 4.66 – 4.54 (m, 3H).  $^{13}\text{C}$  NMR (100 MHz,  $\text{CDCl}_3$ )  $\delta$  165.62, 159.73 (d,  $J = 253.4$  Hz), 133.67, 130.67 (d,  $J = 3.5$  Hz), 129.78, 128.86, 128.60, 128.47 (d,  $J = 3.7$  Hz), 123.74 (d,  $J = 9.5$  Hz), 119.83 (d,  $J = 24.4$  Hz), 118.40 (d,  $J = 14.2$  Hz), 117.15, 63.60 (d,  $J = 1.5$  Hz), 31.35 (d,  $J = 2.9$  Hz). IR (thin film):  $\nu$  2251, 1725  $\text{cm}^{-1}$ . HRMS (ESI) calcd for  $[\text{C}_{16}\text{H}_{12}\text{FBrNNaO}_2]^+$  ( $[\text{M}+\text{Na}]^+$ ): 369.9855, found: 369.9848.

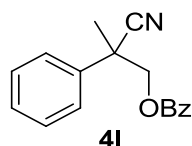

Following the general procedure, product **4l** was obtained as a yellow liquid (70 mg, 53% yield).  $^1\text{H}$  NMR (400 MHz,  $\text{CDCl}_3$ )  $\delta$  7.98 – 7.87 (m, 2H), 7.53 – 7.43 (m, 3H), 7.38 – 7.30 (m, 4H), 7.30 – 7.23 (m, 1H), 4.47 (d,  $J = 1.4$  Hz, 2H), 1.76 (s, 3H).  $^{13}\text{C}$  NMR (100 MHz,  $\text{CDCl}_3$ )  $\delta$  165.71, 136.71, 133.51, 129.79, 129.20, 129.15, 128.68, 128.56, 125.94, 121.64, 69.58, 42.59, 23.63. IR (thin film):  $\nu$  2241, 1726  $\text{cm}^{-1}$ . HRMS (ESI) calcd for  $[\text{C}_{17}\text{H}_{15}\text{NNaO}_2]^+$  ( $[\text{M}+\text{Na}]^+$ ): 288.1000, found: 288.0994.

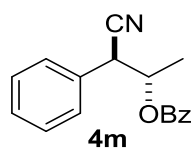

Following the general procedure, product **4m** was obtained as a yellow liquid (70 mg, 53% yield, dr = 1:1 as detected by GC-MS and one of the isomer was lost during separation).  $^1\text{H}$  NMR (400 MHz,  $\text{CDCl}_3$ )  $\delta$  8.13 – 8.05 (m, 2H), 7.64 – 7.57 (m, 1H), 7.50 – 7.35 (m, 7H), 5.37 (qd,  $J = 6.4, 4.7$  Hz, 1H), 4.44 (d,  $J = 4.7$  Hz, 1H), 1.43 (d,  $J = 6.4$  Hz, 3H).  $^{13}\text{C}$  NMR (100

MHz, CDCl<sub>3</sub>)  $\delta$  165.24, 133.39, 131.98, 129.73, 129.45, 129.10, 128.77, 128.50, 128.26, 118.08, 71.36, 43.67, 18.35. IR (thin film):  $\nu$  2318, 1721 cm<sup>-1</sup>. HRMS (ESI) calcd for [C<sub>17</sub>H<sub>15</sub>NNaO<sub>2</sub>]<sup>+</sup> ([M+Na]<sup>+</sup>): 288.1000, found: 288.0994.

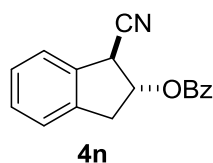

Following the general procedure, product **4n** was obtained as a yellow liquid (67 mg, 51% yield, dr > 20:1 as detected by GC-MS). <sup>1</sup>H NMR (400 MHz, CDCl<sub>3</sub>)  $\delta$  7.98 – 7.91 (m, 2H), 7.49 (t, *J* = 7.4 Hz, 1H), 7.40 – 7.31 (m, 3H), 7.26 – 7.16 (m, 3H), 5.80 (dt, *J* = 7.3, 5.7 Hz, 1H), 4.30 (d, *J* = 5.7 Hz, 1H), 3.58 (dd, *J* = 16.6, 7.2 Hz, 1H), 3.05 (dd, *J* = 16.6, 5.6 Hz, 1H). <sup>13</sup>C NMR (100 MHz, CDCl<sub>3</sub>)  $\delta$  164.77, 138.21, 133.28, 132.53, 128.74, 128.38, 128.08, 127.47, 127.04, 124.25, 123.57, 117.57, 76.82, 40.24, 37.07. IR (thin film):  $\nu$  2243, 1722 cm<sup>-1</sup>. HRMS (ESI) calcd for [C<sub>17</sub>H<sub>13</sub>NNaO<sub>2</sub>]<sup>+</sup> ([M+Na]<sup>+</sup>): 286.0844, found: 286.0837.

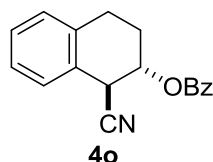

Following the general procedure, product **4o** was obtained as a yellow liquid (60 mg, 43% yield, dr = 5:1 as detected by <sup>1</sup>H NMR). <sup>1</sup>H NMR (400 MHz, CDCl<sub>3</sub>, major and minor)  $\delta$  8.16 – 8.06 (m, 0.17H), 8.07 – 7.98 (m, 1.99H), 7.66 – 7.52 (m, 1.09H), 7.48 – 7.38 (m, 3.25H), 7.34 – 7.10 (m, 3.55H), 5.70 – 5.56 (m, 1H), 5.45 (ddd, *J* = 10.4, 5.3, 3.3 Hz, 0.08H), 4.30 (d, *J* = 7.0 Hz, 0.99H), 4.11 (q, *J* = 7.1 Hz, 0.06H), 3.21 – 2.97 (m, 2.23H), 2.464 – 2.391 (m, 1.08H), 2.14 – 1.97 (m, 1.12H). <sup>13</sup>C NMR (100 MHz, CDCl<sub>3</sub>, major and minor)  $\delta$  165.53, 135.08, 133.51, 129.92, 129.78, 129.56, 129.49, 129.31, 129.02, 128.78, 128.53, 127.53, 127.10, 119.14, 70.63, 36.64, 26.63, 25.95. IR (thin film):  $\nu$  2251, 1725 cm<sup>-1</sup>. HRMS (ESI) calcd for [C<sub>18</sub>H<sub>15</sub>NNaO<sub>2</sub>]<sup>+</sup> ([M+Na]<sup>+</sup>): 300.1000, found: 300.0996.

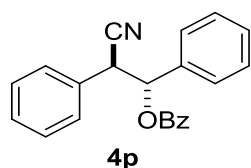

Following the general procedure, product **4p** was obtained as a yellow liquid (49 mg, 30% yield, dr = 2:1 as detected by GC-MS). <sup>1</sup>H NMR (400 MHz, CDCl<sub>3</sub>)  $\delta$  8.11 (dd, *J* = 8.3, 1.4 Hz, 2H), 7.64 – 7.55 (m, 1H), 7.47 (dd, *J* = 8.4, 7.1 Hz, 2H), 7.36 – 7.32 (m, 5H), 7.31 – 7.28 (m, 3H), 7.32 – 7.22 (m, 2H), 6.24 (d, *J* = 5.7 Hz, 1H), 4.34 (d, *J* = 5.6 Hz, 1H). <sup>13</sup>C NMR (100 MHz, CDCl<sub>3</sub>)  $\delta$  164.80, 136.33, 133.60, 131.69, 129.86, 129.23, 129.12, 128.99, 128.81, 128.71, 128.63, 128.47, 126.58, 117.92, 76.63, 45.15.

IR (thin film):  $\nu$  2318, 1724  $\text{cm}^{-1}$ . HRMS (ESI) calcd for  $[\text{C}_{22}\text{H}_{17}\text{NNaO}_2]^+$  ( $[\text{M}+\text{Na}]^+$ ): 350.1157, found: 350.1151.

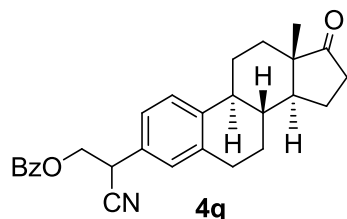

Following the general procedure, 5 mol % of Hantzsch ester (diethyl 1,4-dihydro-2,6-dimethyl-3,5-pyridinedicarboxylate) was added and product **4q** was obtained as a yellow liquid (98 mg, 46% yield, dr = 1:1).  $^1\text{H}$  NMR (400 MHz,  $\text{CDCl}_3$ )  $\delta$  8.12 – 8.02 (m, 2H), 7.64 – 7.55 (m, 1H), 7.46 (t,  $J = 7.7$  Hz, 2H), 7.34 (d,  $J = 8.0$  Hz, 1H), 7.25 – 7.16 (m, 2H), 4.64 (dd,  $J = 10.7, 5.4$  Hz, 1H), 4.48 (dd,  $J = 10.9, 8.7$  Hz, 1H), 4.26 (dd,  $J = 8.7, 5.5$  Hz, 1H), 2.97 – 2.89 (m, 2H), 2.51 (dd,  $J = 18.7, 8.7$  Hz, 1H), 2.448 – 2.397 (m, 1H), 2.30 (td,  $J = 10.7, 4.3$  Hz, 1H), 2.22 – 2.10 (m, 1H), 2.11 – 1.99 (m, 2H), 2.02 – 1.92 (m, 1H), 1.69 – 1.57 (m, 2H), 1.60 – 1.40 (m, 4H), 0.91 (s, 3H).  $^{13}\text{C}$  NMR (100 MHz,  $\text{CDCl}_3$ )  $\delta$  165.91, 140.73, 137.83, 133.58, 129.83, 129.14, 128.81, 128.56, 128.32, 126.40, 125.12, 118.72, 65.58, 50.47, 47.93, 44.28, 37.95, 37.16, 35.84, 31.55, 29.34, 26.30, 25.67, 21.59, 13.84. IR (thin film):  $\nu$  2246, 1727  $\text{cm}^{-1}$ . HRMS (ESI) calcd for  $[\text{C}_{28}\text{H}_{29}\text{NNaO}_3]^+$  ( $[\text{M}+\text{Na}]^+$ ): 450.2054, found: 450.2039.

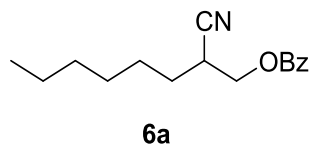

Following the general procedure, product **6a** was obtained as a colorless liquid (52 mg, 40% yield).  $^1\text{H}$  NMR (400 MHz,  $\text{CDCl}_3$ )  $\delta$  8.07 (dd,  $J = 8.3, 1.3$  Hz, 2H), 7.63 – 7.56 (m, 1H), 7.46 (dd,  $J = 8.4, 7.1$  Hz, 2H), 4.47 (dd,  $J = 11.0, 5.4$  Hz, 1H), 4.38 (dd,  $J = 11.0, 7.5$  Hz, 1H), 3.04 (ddt,  $J = 9.1, 7.5, 5.5$  Hz, 1H), 1.81 – 1.45 (m, 4H), 1.41 – 1.25 (m, 6H), 0.92 – 0.85 (m, 3H).  $^{13}\text{C}$  NMR (100 MHz,  $\text{CDCl}_3$ )  $\delta$  165.97, 133.51, 129.79, 129.20, 128.54, 119.79, 63.60, 31.75, 31.45, 28.94, 28.68, 26.87, 22.49, 14.01. IR (thin film):  $\nu$  2244, 1725  $\text{cm}^{-1}$ . HRMS (ESI) calcd for  $[\text{C}_{16}\text{H}_{21}\text{NNaO}_2]^+$  ( $[\text{M}+\text{Na}]^+$ ): 282.1470, found: 282.1464.

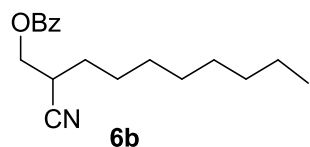

Following the general procedure, product **6b** was obtained as a colorless liquid (64.6 mg, 45% yield).  $^1\text{H}$  NMR (400 MHz,  $\text{CDCl}_3$ )  $\delta$  8.10 – 8.05 (m, 2H), 7.62 – 7.56 (m, 1H), 7.46 (dd,  $J = 8.4, 7.1$  Hz, 2H), 4.47 (dd,  $J = 11.0, 5.4$  Hz, 1H), 4.38 (dd,  $J = 11.0, 7.5$  Hz, 1H), 3.08 – 2.99 (m, 1H), 1.82 – 1.67 (m, 2H), 1.66 – 1.56 (m, 1H), 1.56 – 1.45 (m, 1H), 1.40 – 1.22 (m, 10H), 0.93 – 0.85 (m, 3H).  $^{13}\text{C}$  NMR (100 MHz,  $\text{CDCl}_3$ )  $\delta$  165.97, 133.51, 129.79, 129.20, 128.54, 119.79, 63.59, 31.79, 31.76, 29.24, 29.13,

29.03, 28.95, 26.91, 22.63, 14.09. IR (thin film):  $\nu$  2245, 1726  $\text{cm}^{-1}$ . HRMS (ESI) calcd for  $[\text{C}_{18}\text{H}_{25}\text{NNaO}_2]^+$  ( $[\text{M}+\text{Na}]^+$ ): 310.1783, found: 310.1778.

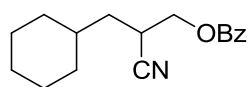

**6c**

Following the general procedure, product **6c** was obtained as a colorless liquid (46 mg, 34% yield).  $^1\text{H}$  NMR (400 MHz,  $\text{CDCl}_3$ )  $^1\text{H}$  NMR (400 MHz, Chloroform-*d*)  $\delta$  8.15 – 7.98 (m, 2H), 7.73 – 7.55 (m, 1H), 7.47 (dd,  $J = 8.4, 7.1$  Hz, 2H), 4.47 (dd,  $J = 10.9, 5.3$  Hz, 1H), 4.35 (dd,  $J = 11.0, 7.6$  Hz, 1H), 3.17 – 3.08 (m, 1H), 1.89 – 1.65 (m, 6H), 1.53 – 1.44 (m, 1H), 1.36 – 1.23 (m, 3H), 1.22 – 1.08 (m, 1H), 1.06 – 0.80 (m, 2H).  $^{13}\text{C}$  NMR (100 MHz,  $\text{CDCl}_3$ )  $\delta$  165.99, 133.51, 129.80, 129.20, 128.54, 119.98, 63.96, 36.32, 35.18, 33.44, 32.30, 29.28, 26.26, 25.97, 25.85. IR (thin film):  $\nu$  2244, 1724  $\text{cm}^{-1}$ . HRMS (ESI) calcd for  $[\text{C}_{16}\text{H}_{21}\text{NNaO}_2]^+$  ( $[\text{M}+\text{Na}]^+$ ): 294.1470, found: 294.1466.

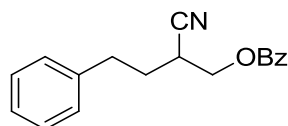

**6d**

Following the general procedure, product **6d** was obtained as a colorless liquid (46 mg, 33% yield).  $^1\text{H}$  NMR (400 MHz,  $\text{CDCl}_3$ )  $\delta$  8.14 – 7.91 (m, 2H), 7.66 – 7.54 (m, 1H), 7.45 (dd,  $J = 8.4, 7.1$  Hz, 2H), 7.32 (dd,  $J = 7.9, 6.6$  Hz, 2H), 7.26 – 7.19 (m, 3H), 4.55 – 4.24 (m, 2H), 3.02 – 2.92 (m, 2H), 2.81 (dt,  $J = 14.0, 8.2$  Hz, 1H), 2.19 – 2.06 (m, 1H), 2.06 – 1.94 (m, 1H).  $^{13}\text{C}$  NMR (100 MHz,  $\text{CDCl}_3$ )  $\delta$  165.91, 139.48, 133.56, 129.81, 129.12, 128.81, 128.57, 128.45, 126.70, 119.48, 63.43, 32.89, 31.06, 30.65. IR (thin film):  $\nu$  2244, 1722  $\text{cm}^{-1}$ . HRMS (ESI) calcd for  $[\text{C}_{18}\text{H}_{17}\text{NNaO}_2]^+$  ( $[\text{M}+\text{Na}]^+$ ): 302.1157, found: 302.1151.

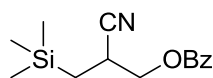

**6e**

Following the general procedure, product **6e** was obtained as a yellow liquid (39 mg, 30% yield).  $^1\text{H}$  NMR (400 MHz,  $\text{CDCl}_3$ )  $\delta$  8.09 – 8.05 (m, 2H), 7.62 – 7.56 (m, 1H), 7.46 (t,  $J = 7.7$  Hz, 2H), 4.45 (dd,  $J = 10.9, 5.2$  Hz, 1H), 4.30 (dd,  $J = 10.8, 8.4$  Hz, 1H), 3.11 – 3.02 (m, 1H), 1.05 (dd,  $J = 14.7, 10.6$  Hz, 1H), 0.89 (dd,  $J = 14.7, 5.2$  Hz, 1H), 0.16 (s, 9H).  $^{13}\text{C}$  NMR (100 MHz,  $\text{CDCl}_3$ )  $\delta$  167.35, 134.85, 131.16, 129.89, 122.26, 67.36, 28.81, 17.86, 0.01. IR (thin film):  $\nu$  2243, 1725  $\text{cm}^{-1}$ . HRMS (ESI) calcd for  $[\text{C}_{14}\text{H}_{19}\text{NNaO}_2\text{Si}]^+$  ( $[\text{M}+\text{Na}]^+$ ): 284.1083, found: 284.1078.

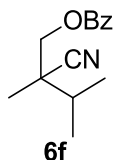

Following the general procedure, product **6f** was obtained as a yellow liquid (45 mg, 39% yield).  $^1\text{H}$  NMR (400 MHz, Chloroform-*d*)  $\delta$  8.12 – 8.04 (m, 2H), 7.64 – 7.55 (m, 1H), 7.47 (dd,  $J = 8.4, 7.1$  Hz, 2H), 4.42 (d,  $J = 11.1$  Hz, 1H), 4.32 (d,  $J = 11.0$  Hz, 1H), 2.03 (p,  $J = 6.8$  Hz, 1H), 1.41 (s, 3H), 1.17 (d,  $J = 6.8$  Hz, 3H), 1.09 (d,  $J = 6.8$  Hz, 3H).  $^{13}\text{C}$  NMR (100 MHz,  $\text{CDCl}_3$ )  $\delta$  165.91, 133.48, 129.76, 129.30, 128.56, 121.85, 67.12, 41.69, 32.74, 18.77, 18.37, 17.39. IR (thin film):  $\nu$  2237, 1726  $\text{cm}^{-1}$ . HRMS (ESI) calcd for  $[\text{C}_{14}\text{H}_{17}\text{NNaO}_2]^+$  ( $[\text{M}+\text{Na}]^+$ ): 254.1157, found: 254.1150.

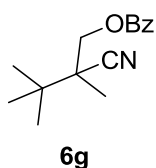

Following the general procedure, product **6g** was obtained as a yellow liquid (63.7 mg, 52% yield).  $^1\text{H}$  NMR (400 MHz,  $\text{CDCl}_3$ )  $\delta$  8.18 – 8.05 (m, 2H), 7.59 (d,  $J = 7.4$  Hz, 1H), 7.47 (dd,  $J = 8.3, 7.0$  Hz, 2H), 4.50 (d,  $J = 10.9$  Hz, 1H), 4.32 (d,  $J = 10.9$  Hz, 1H), 1.45 (s, 3H), 1.16 (s, 9H).  $^{13}\text{C}$  NMR (100 MHz,  $\text{CDCl}_3$ )  $\delta$  166.15, 133.45, 129.78, 129.36, 128.56, 122.04, 66.14, 45.11, 35.27, 26.03, 17.98. IR (thin film):  $\nu$  2236, 1725  $\text{cm}^{-1}$ . HRMS (ESI) calcd for  $[\text{C}_{15}\text{H}_{19}\text{NNaO}_2]^+$  ( $[\text{M}+\text{Na}]^+$ ): 268.1313, found: 268.1309.

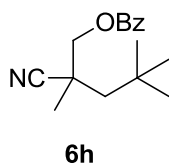

Following the general procedure, product **6h** was obtained as a yellow liquid (58 mg, 45% yield).  $^1\text{H}$  NMR (400 MHz,  $\text{CDCl}_3$ )  $\delta$  8.12 – 8.06 (m, 2H), 7.65 – 7.56 (m, 1H), 7.47 (dd,  $J = 8.4, 7.1$  Hz, 2H), 4.39 (d,  $J = 10.9$  Hz, 1H), 4.23 (d,  $J = 10.9$  Hz, 1H), 1.77 (d,  $J = 14.6$  Hz, 1H), 1.54 (d,  $J = 14.7$  Hz, 1H), 1.54 (s, 3H), 1.15 (s, 9H).  $^{13}\text{C}$  NMR (100 MHz,  $\text{CDCl}_3$ )  $\delta$  165.86, 133.49, 129.77, 129.29, 128.58, 122.90, 69.62, 48.72, 35.56, 31.58, 30.86, 24.26. IR (thin film):  $\nu$  2237, 1726  $\text{cm}^{-1}$ . HRMS (ESI) calcd for  $[\text{C}_{16}\text{H}_{21}\text{NNaO}_2]^+$  ( $[\text{M}+\text{Na}]^+$ ): 282.1470, found: 282.1464.

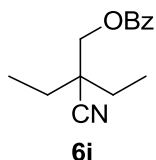

Following the general procedure, product **6i** was obtained as a yellow liquid (46 mg, 40% yield).  $^1\text{H}$  NMR (400 MHz,  $\text{CDCl}_3$ )  $\delta$  8.11 – 8.03 (m, 2H), 7.63 – 7.56 (m, 1H),

7.47 (dd,  $J = 8.4, 7.1$  Hz, 2H), 4.37 (s, 2H), 1.78 (d,  $J = 7.6$  Hz, 4H), 1.11 (t,  $J = 7.5$  Hz, 6H).  $^{13}\text{C}$  NMR (100 MHz,  $\text{CDCl}_3$ )  $\delta$  165.87, 133.48, 129.74, 129.30, 128.56, 121.41, 65.55, 42.49, 26.92, 8.78. IR (thin film):  $\nu$  2238, 1726  $\text{cm}^{-1}$ . HRMS (ESI) calcd for  $[\text{C}_{14}\text{H}_{17}\text{NNaO}_2]^+$  ( $[\text{M}+\text{Na}]^+$ ): 254.1157, found: 254.1152.

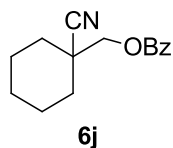

Following the general procedure, product **6j** was obtained as a white liquid (74 mg, 61% yield).  $^1\text{H}$  NMR (400 MHz,  $\text{CDCl}_3$ )  $\delta$  8.15 – 8.01 (m, 2H), 7.63 – 7.54 (m, 1H), 7.46 (dd,  $J = 8.4, 7.1$  Hz, 2H), 4.31 (s, 2H), 2.10 (dd,  $J = 12.8, 2.1$  Hz, 2H), 1.79 – 1.75 (m, 3H), 1.74 – 1.59 (m, 2H), 1.40 (td,  $J = 13.0, 3.5$  Hz, 2H), 1.30 – 1.16 (m, 1H).  $^{13}\text{C}$  NMR (100 MHz,  $\text{CDCl}_3$ )  $\delta$  165.92, 133.45, 129.78, 129.31, 128.53, 121.64, 69.07, 39.60, 32.48, 25.23, 22.40. IR (thin film):  $\nu$  2237, 1725  $\text{cm}^{-1}$ . HRMS (ESI) calcd for  $[\text{C}_{15}\text{H}_{17}\text{NNaO}_2]^+$  ( $[\text{M}+\text{Na}]^+$ ): 266.1157, found: 266.1152.

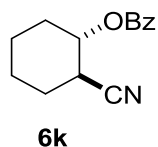

Following the general procedure, product **6k** was obtained as a colorless liquid (73 mg, 64% yield, dr > 20:1 as detected by GC-MS).  $^1\text{H}$  NMR (400 MHz,  $\text{CDCl}_3$ , major and minor)  $\delta$  8.10 – 8.02 (m, 2H), 7.62 – 7.52 (m, 1H), 7.49 – 7.40 (m, 2H), 5.17 – 5.00 (m, 1H), 3.27 (q,  $J = 4.1$  Hz, 0.32H), 2.87 (td,  $J = 9.2, 4.0$  Hz, 0.69H), 2.26 – 2.05 (m, 1.56H), 2.00 – 1.90 (m, 0.64H), 1.89 – 1.73 (m, 2.77H), 1.66 (tq,  $J = 7.7, 3.5$  Hz, 0.72H), 1.58 – 1.32 (m, 2.49H), 0.93 – 0.79 (m, 0.36H).  $^{13}\text{C}$  NMR (100 MHz,  $\text{CDCl}_3$ , major and minor)  $\delta$  165.50, 165.37, 133.39, 133.31, 129.80, 129.74, 129.72, 129.64, 119.88, 119.29, 71.86, 70.72, 33.60, 33.29, 30.16, 28.33, 27.70, 27.29, 23.48, 23.06, 22.65, 21.67. IR (thin film):  $\nu$  2243, 1721  $\text{cm}^{-1}$ . HRMS (ESI) calcd for  $[\text{C}_{14}\text{H}_{15}\text{NNaO}_2]^+$  ( $[\text{M}+\text{Na}]^+$ ): 252.1000, found: 252.0995.

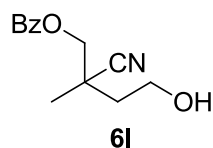

Following the general procedure, product **6l** was obtained as a colorless liquid (55 mg, 47% yield).  $^1\text{H}$  NMR (400 MHz,  $\text{CDCl}_3$ )  $\delta$  8.09 – 8.05 (m, 2H), 7.62 – 7.55 (m, 1H), 7.46 (dd,  $J = 8.4, 7.1$  Hz, 2H), 4.44 (d,  $J = 11.0$  Hz, 1H), 4.33 (d,  $J = 11.0$  Hz, 1H), 4.00 – 3.90 (m, 1H), 2.05 (dt,  $J = 14.3, 6.5$  Hz, 2H), 1.89 (dt,  $J = 14.2, 6.3$  Hz, 1H), 1.52 (s, 3H).  $^{13}\text{C}$  NMR (100 MHz,  $\text{CDCl}_3$ )  $\delta$  165.91, 133.58, 129.78, 129.17, 128.60, 122.07, 68.48, 58.93, 38.43, 36.10, 22.17. IR (thin film):  $\nu$  2240, 1724, 1274  $\text{cm}^{-1}$ . HRMS (ESI) calcd for  $[\text{C}_{13}\text{H}_{15}\text{NNaO}_3]^+$  ( $[\text{M}+\text{Na}]^+$ ): 256.0950, found: 256.0945.

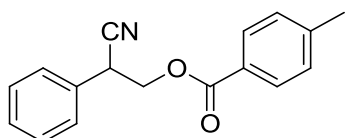

**7a**

Following the general procedure, product **7a** was obtained as a colorless liquid (89 mg, 67% yield).  $^1\text{H}$  NMR (400 MHz,  $\text{CDCl}_3$ )  $\delta$  7.96 – 7.92 (m, 2H), 7.50 – 7.34 (m, 5H), 7.32 – 7.21 (m, 2H), 4.64 (dd,  $J = 10.9, 5.7$  Hz, 1H), 4.50 (dd,  $J = 10.9, 8.5$  Hz, 1H), 4.31 (dd,  $J = 8.5, 5.6$  Hz, 1H), 2.42 (s, 3H).  $^{13}\text{C}$  NMR (100 MHz,  $\text{CDCl}_3$ )  $\delta$  165.94, 144.42, 131.58, 129.86, 129.36, 129.28, 128.93, 127.81, 126.33, 118.57, 65.36, 37.60, 21.75. IR (thin film):  $\nu$  2248, 1721  $\text{cm}^{-1}$ . HRMS (ESI) calcd for  $[\text{C}_{17}\text{H}_{15}\text{NNaO}_2]^+$  ( $[\text{M}+\text{Na}]^+$ ): 288.1000, found: 288.0994.

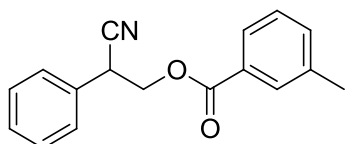

**7b**

Following the general procedure, product **7b** was obtained as a colorless liquid (86 mg, 65% yield).  $^1\text{H}$  NMR (400 MHz,  $\text{CDCl}_3$ )  $\delta$  7.85 (dd,  $J = 6.8, 1.5$  Hz, 2H), 7.49 – 7.36 (m, 6H), 7.38 – 7.29 (m, 1H), 4.64 (dd,  $J = 10.9, 5.6$  Hz, 1H), 4.51 (dd,  $J = 10.9, 8.6$  Hz, 1H), 4.32 (dd,  $J = 8.6, 5.6$  Hz, 1H), 2.41 (s, 3H).  $^{13}\text{C}$  NMR (100 MHz,  $\text{CDCl}_3$ )  $\delta$  166.07, 138.40, 134.37, 131.54, 130.33, 129.38, 129.01, 128.96, 128.46, 127.81, 126.97, 118.57, 65.47, 37.58, 21.30. IR (thin film):  $\nu$  2248, 1721  $\text{cm}^{-1}$ . HRMS (ESI) calcd for  $[\text{C}_{17}\text{H}_{15}\text{NNaO}_2]^+$  ( $[\text{M}+\text{Na}]^+$ ): 288.1000, found: 288.0996.

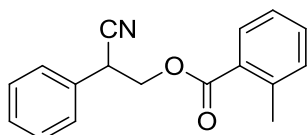

**7c**

Following the general procedure, product **7c** was obtained as a colorless liquid (58 mg, 44% yield).  $^1\text{H}$  NMR (400 MHz,  $\text{CDCl}_3$ )  $\delta$  7.95 (dd,  $J = 8.1, 1.5$  Hz, 1H), 7.47 – 7.35 (m, 6H), 7.29 – 7.22 (m, 2H), 4.63 (dd,  $J = 10.9, 5.6$  Hz, 1H), 4.50 (dd,  $J = 10.9, 8.5$  Hz, 1H), 4.31 (dd,  $J = 8.5, 5.6$  Hz, 1H), 2.59 (s, 3H).  $^{13}\text{C}$  NMR (100 MHz,  $\text{CDCl}_3$ )  $\delta$  166.64, 140.82, 132.66, 131.86, 131.56, 130.93, 129.38, 128.95, 128.28, 127.81, 125.93, 118.65, 65.39, 37.55, 21.86. IR (thin film):  $\nu$  2248, 1723  $\text{cm}^{-1}$ . HRMS (ESI) calcd for  $[\text{C}_{17}\text{H}_{15}\text{NNaO}_2]^+$  ( $[\text{M}+\text{Na}]^+$ ): 288.1000, found: 288.0992.

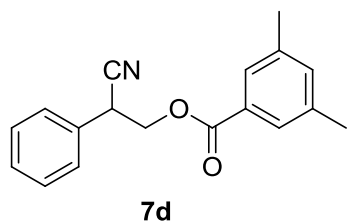

Following the general procedure, product **7d** was obtained as a colorless liquid (85 mg, 61% yield).  $^1\text{H}$  NMR (400 MHz,  $\text{CDCl}_3$ )  $\delta$  7.67 (d,  $J = 1.6$  Hz, 2H), 7.50 – 7.37 (m, 5H), 7.23 (s, 1H), 4.64 (dd,  $J = 10.9, 5.6$  Hz, 1H), 4.51 (dd,  $J = 10.9, 8.7$  Hz, 1H), 4.32 (dd,  $J = 8.7, 5.6$  Hz, 1H), 2.37 (s, 6H).  $^{13}\text{C}$  NMR (100 MHz,  $\text{CDCl}_3$ )  $\delta$  166.26, 138.24, 135.27, 131.56, 129.37, 128.95, 127.82, 127.53, 118.61, 65.45, 37.59, 21.19. IR (thin film): 2248, 1720  $\text{cm}^{-1}$ . IR (thin film):  $\nu$  2248, 1723  $\text{cm}^{-1}$ . HRMS (ESI) calcd for  $[\text{C}_{18}\text{H}_{17}\text{NNaO}_2]^+$  ( $[\text{M}+\text{Na}]^+$ ): 302.1157, found: 302.1152.

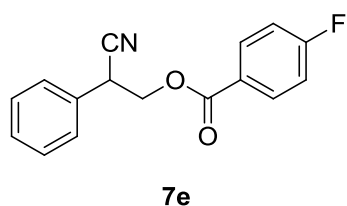

Following the general procedure, product **7e** was obtained as a colorless liquid (102 mg, 76% yield).  $^1\text{H}$  NMR (400 MHz,  $\text{CDCl}_3$ )  $\delta$  8.13 – 8.03 (m, 2H), 7.50 – 7.35 (m, 5H), 7.13 (t,  $J = 8.6$  Hz, 2H), 4.66 (dd,  $J = 10.9, 5.6$  Hz, 1H), 4.51 (dd,  $J = 10.9, 8.5$  Hz, 1H), 4.32 (dd,  $J = 8.5, 5.6$  Hz, 1H).  $^{13}\text{C}$  NMR (100 MHz,  $\text{CDCl}_3$ )  $\delta$  166.12 (d,  $J = 255.1$  Hz), 164.87, 132.43 (d,  $J = 9.5$  Hz), 131.40, 129.41, 129.01, 127.78, 125.33 (d,  $J = 3.0$  Hz), 118.48, 115.81 (d,  $J = 22.1$  Hz), 65.56, 37.55. IR (thin film):  $\nu$  2248, 1723  $\text{cm}^{-1}$ . HRMS (ESI) calcd for  $[\text{C}_{16}\text{H}_{12}\text{FNNaO}_2]^+$  ( $[\text{M}+\text{Na}]^+$ ): 292.0750, found: 292.0744.

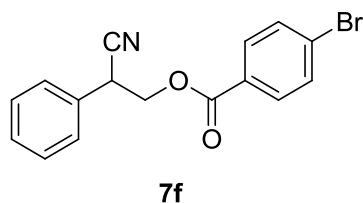

Following the general procedure, product **7f** was obtained as a yellow liquid (76 mg, 46% yield).  $^1\text{H}$  NMR (400 MHz,  $\text{CDCl}_3$ )  $\delta$  7.94 – 7.87 (m, 2H), 7.63 – 7.56 (m, 2H), 7.48 – 7.36 (m, 5H), 4.65 (dd,  $J = 10.9, 5.6$  Hz, 1H), 4.52 (dd,  $J = 10.9, 8.5$  Hz, 1H), 4.31 (dd,  $J = 8.5, 5.6$  Hz, 1H).  $^{13}\text{C}$  NMR (100 MHz,  $\text{CDCl}_3$ )  $\delta$  165.16, 131.97, 131.32, 131.29, 129.43, 129.05, 128.87, 127.96, 127.77, 118.40, 65.63, 37.53. IR (thin film):  $\nu$  2249, 1722  $\text{cm}^{-1}$ . HRMS (ESI) calcd for  $[\text{C}_{16}\text{H}_{12}\text{BrNNaO}_2]^+$  ( $[\text{M}+\text{Na}]^+$ ): 351.9949, found: 351.9943.



## Transformations of the oxycyanation products

### 1. Synthesis of compound **8**

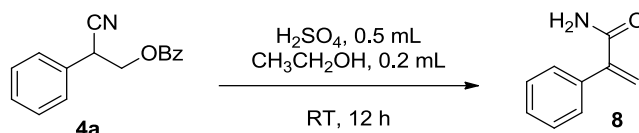

A solution of **4a** (0.1 mmol), EtOH (0.2 mL), and  $\text{H}_2\text{SO}_4$  (1 mL) was stirred at rt for 12 h. On completion the reaction was quenched with ice- $\text{H}_2\text{O}$  (3 mL). The aqueous layer was extracted with ethyl acetate and the combined organic layers was washed with brine (10 mL), dried over  $\text{MgSO}_4$  and concentrated under vacuum. The residue was purified by column chromatography to yield **8** (12 mg, 80% yield).  $^1\text{H}$  NMR (400 MHz,  $\text{CDCl}_3$ )  $\delta$  7.45 – 7.35 (m, 5H), 6.21 – 6.17 (m, 2H), 5.68 – 5.65 (m, 2H).  $^{13}\text{C}$  NMR (100 MHz,  $\text{CDCl}_3$ )  $\delta$  169.35, 144.11, 137.07, 128.72, 128.59, 128.16, 123.25. These data matches with the reported value.<sup>2</sup>

### 2. Synthesis of compound **9**

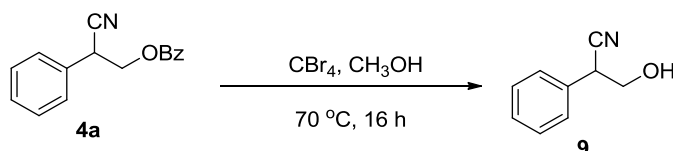

A solution of **4a** (0.2 mmol),  $\text{CH}_3\text{OH}$  (0.6 mL), and  $\text{CBr}_4$  (0.04 mmol) was stirred at 70 °C for 16 h. On completion the reaction was quenched with  $\text{H}_2\text{O}$  (3 mL). The aqueous layer was extracted with diethyl ether and the combined organic layers was washed with brine (3 mL), dried over  $\text{MgSO}_4$  and concentrated under vacuum. The residue was purified by column chromatography to yield **9** as a clear oil (18 mg, 61% yield).  $^1\text{H}$  NMR (400 MHz,  $\text{CDCl}_3$ )  $\delta$  7.45 – 7.33 (m, 5H), 4.04 – 3.88 (m, 3H), 2.25 (t,  $J = 6.3$  Hz, 1H).  $^{13}\text{C}$  NMR (100 MHz,  $\text{CDCl}_3$ )  $\delta$  132.16, 129.29, 128.69, 127.81, 119.35, 65.36, 40.98. These data matches with the reported value.<sup>3</sup>

### 3. Synthesis of compound 10

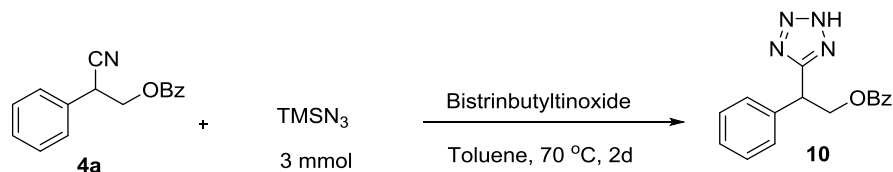

A solution of **4a** (0.18 mmol),  $\text{TMSN}_3$  (3 mmol), and  $\text{Bu}_2\text{SnO}$  (0.6 equiv), toluene was stirred at 70 °C for 2 d. On completion the reaction was quenched with  $\text{H}_2\text{O}$  (3 mL). The aqueous layer was extracted with ethyl acetate and the combined organic layers was washed with brine (3 mL), dried over  $\text{MgSO}_4$  and concentrated under vacuum. The residue was purified by column chromatography to yield **10** as a yellow oil (72 mg, 82% yield).  $^1\text{H}$  NMR (400 MHz,  $\text{DMSO-}d_6$ )  $\delta$  7.83 – 7.77 (m, 2H), 7.64 – 7.58 (m, 1H), 7.47 (t,  $J = 7.7$  Hz, 2H), 7.41 – 7.37 (m, 2H), 7.29 (t,  $J = 7.5$  Hz, 2H), 7.24 – 7.18 (m, 1H), 4.89 – 4.59 (m, 3H).  $^{13}\text{C}$  NMR (400 MHz,  $\text{DMSO-}d_6$ )  $\delta$  165.91, 159.24, 140.04, 133.80, 130.02, 129.48, 129.16, 128.81, 128.79, 127.39, 67.60, 41.86. IR (thin film):  $\nu$  1714  $\text{cm}^{-1}$ . HRMS (ESI) calcd for  $[\text{C}_{16}\text{H}_{14}\text{N}_4\text{NaO}_2]^+$  ( $[\text{M}+\text{Na}]^+$ ): 317.1014, found: 317.1008.<sup>4</sup>

## Mechanism studies

### 1. Radical trapping experiments

(a) With TEMPO

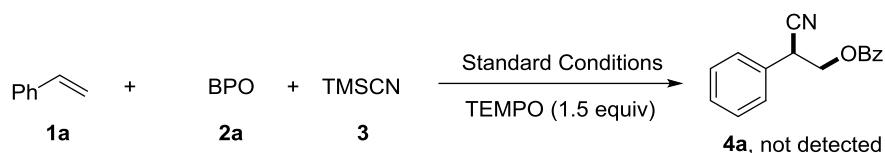

In a flame-dried Schlenk tube,  $\text{Cu}(\text{CH}_3\text{CN})_4\text{PF}_6$  (0.025 mmol, 5 mol %) and 1,10-phenanthroline (0.035 mmol, 7 mol %) were dissolved in TFEA (0.5 mL) under a nitrogen atmosphere, and the mixture was stirred at room temperature for 30 minutes. Then styrene **1a** (0.5 mmol, 1.0 equiv), BPO (0.75 mmol, 1.5 equiv), TEMPO (0.75 mmol, 1.5 equiv) and TMSCN (1 mmol, 2 equiv) were sequentially added. The reaction mixture was stirred at 50 °C for 24 hours. The reaction mixture was detected by GC-MS analysis and no trace of product **4a** was detected.

(b) With BHT

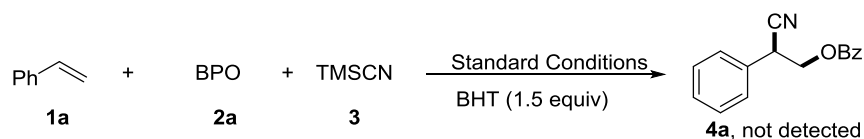

In a flame-dried Schlenk tube,  $\text{Cu}(\text{CH}_3\text{CN})_4\text{PF}_6$  (0.025 mmol, 5 mol %) and 1,10-phenanthroline (0.035 mmol, 7 mol %) were dissolved in TFEA (0.5 mL) under a nitrogen atmosphere, and the mixture was stirred at room temperature for 30 minutes. Then styrene **1a** (0.5 mmol, 1.0 equiv), BPO (0.75 mmol, 1.5 equiv), BHT (0.75 mmol, 1.5 equiv) and TMSCN (1 mmol, 2 equiv) were sequentially added. The reaction mixture was stirred at 50 °C for 24 hours. The reaction mixture was detected by GC-MS analysis and no trace of product **4a** was detected.

## 2. Ring-opening experiment

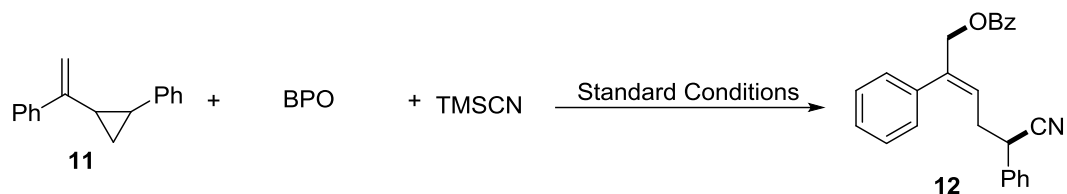

In a flame-dried Schlenk tube,  $\text{Cu}(\text{CH}_3\text{CN})_4\text{PF}_6$  (0.025 mmol, 5 mol %) and 1,10-phenanthroline (0.035 mmol, 7 mol %) were dissolved in TFEA (0.5 mL) under a nitrogen atmosphere, and the mixture was stirred at room temperature for 30 minutes. Then styrene **11** (0.5 mmol, 1.0 equiv), BPO (0.75 mmol, 1.5 equiv) and TMSCN (1 mmol, 2 equiv) were sequentially added. The reaction mixture was stirred at 50 °C for 24 hours. After the reaction completion, the solvent was evaporated under reduced pressure. The residue was purified by flash column chromatography on silica gel to afford the product **12**.

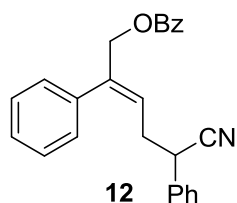

Product **12** was obtained as a yellow liquid (61 mg, 33% yield).  $^1\text{H}$  NMR (400 MHz,  $\text{CDCl}_3$ )  $\delta$  7.85 – 7.81 (m, 2H), 7.48 – 7.40 (m, 1H), 7.36 – 7.31 (m, 3H), 7.29 (t,  $J$  = 4.4 Hz, 6H), 7.27 – 7.19 (m, 3H), 5.98 (t,  $J$  = 7.8 Hz, 1H), 5.07 (d,  $J$  = 12.6 Hz, 1H), 4.97 (d,  $J$  = 12.6 Hz, 1H), 3.92 (dd,  $J$  = 7.6, 6.6 Hz, 1H), 3.01 – 2.85 (m, 2H).  $^{13}\text{C}$  NMR (100 MHz,  $\text{CDCl}_3$ )  $\delta$  166.33, 139.97, 138.68, 134.91, 133.09, 129.87, 129.64, 129.20, 128.52, 128.39, 128.36, 127.90, 127.82, 127.43, 126.40, 120.22, 61.33, 37.53, 34.73. IR (thin film):  $\nu$  2242, 1719  $\text{cm}^{-1}$ . HRMS (ESI) calcd for  $[\text{C}_{25}\text{H}_{21}\text{NNaO}_2]^+$  ( $[\text{M}+\text{Na}]^+$ ): 390.1470, found: 390.1466.

## Asymmetric oxycyanation

Table S1. Optimization of reaction conditions

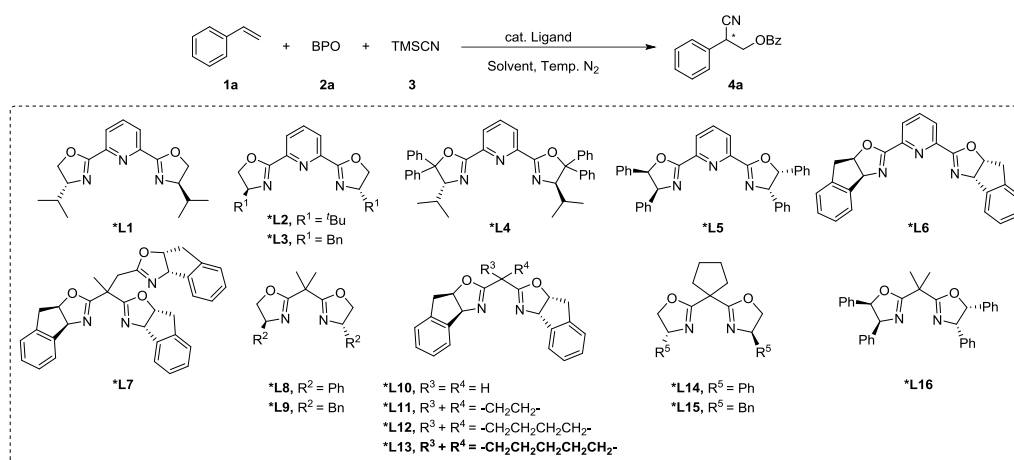

| Entry           | Cat.                                                | Ligand | Solvent | Temp (°C) | Yield (%) <sup>b</sup> | Er value  |
|-----------------|-----------------------------------------------------|--------|---------|-----------|------------------------|-----------|
| 1               | Cu(CH <sub>3</sub> CN) <sub>4</sub> PF <sub>6</sub> | *L1    | TFEA    | 50        | 54                     | 33:67     |
| 2               | Cu(CH <sub>3</sub> CN) <sub>4</sub> PF <sub>6</sub> | *L2    | TFEA    | 50        | 62                     | 63.5:36.5 |
| 3               | Cu(CH <sub>3</sub> CN) <sub>4</sub> PF <sub>6</sub> | *L3    | TFEA    | 50        | 75                     | 81.5:18.5 |
| 4               | Cu(CH <sub>3</sub> CN) <sub>4</sub> PF <sub>6</sub> | *L4    | TFEA    | 50        | 31                     | 32.5:67.5 |
| 5               | Cu(CH <sub>3</sub> CN) <sub>4</sub> PF <sub>6</sub> | *L5    | TFEA    | 50        | 35                     | 65.5:34.5 |
| 6               | Cu(CH <sub>3</sub> CN) <sub>4</sub> PF <sub>6</sub> | *L6    | TFEA    | 50        | 32                     | 65.5:34.5 |
| 7               | Cu(CH <sub>3</sub> CN) <sub>4</sub> PF <sub>6</sub> | *L7    | TFEA    | 50        | 70                     | 82:18     |
| 8               | Cu(CH <sub>3</sub> CN) <sub>4</sub> PF <sub>6</sub> | *L8    | TFEA    | 50        | 77                     | 77.5:22.5 |
| 9               | Cu(CH <sub>3</sub> CN) <sub>4</sub> PF <sub>6</sub> | *L9    | TFEA    | 50        | 66                     | 83:17     |
| 10              | Cu(CH <sub>3</sub> CN) <sub>4</sub> PF <sub>6</sub> | *L10   | TFEA    | 50        | 54                     | 71:29     |
| 11              | Cu(CH <sub>3</sub> CN) <sub>4</sub> PF <sub>6</sub> | *L11   | TFEA    | 50        | 69                     | 77:23     |
| 12 <sup>c</sup> | Cu(CH <sub>3</sub> CN) <sub>4</sub> PF <sub>6</sub> | *L9    | TFEA    | 50        | 80                     | 87:13     |
| 13              | Cu(OAc) <sub>2</sub>                                | *L9    | TFEA    | 50        | 82                     | 89:11     |
| 14              | CuTc                                                | *L9    | TFEA    | 50        | 86                     | 85:15     |
| 15              | Cu(OAc) <sub>2</sub>                                | *L9    | TFEA    | RT        | 84                     | 88:12     |
| 16              | Cu(OAc) <sub>2</sub>                                | *L12   | TFEA    | RT        | 89                     | 85:15     |
| 17              | Cu(OAc) <sub>2</sub>                                | *L13   | TFEA    | RT        | 88                     | 90:10     |
| 18              | Cu(OAc) <sub>2</sub>                                | *L14   | TFEA    | RT        | 84                     | 23.5:76.5 |
| 19              | Cu(OAc) <sub>2</sub>                                | *L15   | TFEA    | RT        | 71                     | 14:86     |
| 20              | Cu(OAc) <sub>2</sub>                                | *L16   | TFEA    | RT        | 80                     | 70:30     |
| 21 <sup>c</sup> | Cu(OAc) <sub>2</sub>                                | *L13   | TFEA    | RT        | 83                     | 91:9      |

<sup>a</sup> Reaction conditions: styrene **1a** (0.2 mmol), BPO **2a** (0.3 mmol), TMSCN **3** (0.4 mmol), cat. (5 mol %), ligand (7 mol %), solvent (0.5 mL), 24 h. <sup>b</sup> isolated yields. <sup>c</sup> 2.5 mol % of Cu(OAc)<sub>2</sub> and 3.5 mol % of ligand were used instead.

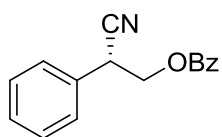

**(R)-4a**

The reaction was conducted following the general procedure: the mixture of  $\text{Cu}(\text{OAc})_2$  (2.5 mol %), \***L13** (3.5 mol %), BPO (181.5 mg, 0.75 mmol, 1.5 equiv), TFEA (0.5 mL), TMSCN (0.75 mmol, 1.5 equiv), and styrene (0.5 mmol, 1 equiv) was stirred at rt for 24 hours, and **(R)-4a** was obtained (102 mg, 81% yield, 91:9 er).  $[\alpha]^{24.5}_{\text{D}} = 44.596$  ( $c$  0.32,  $\text{CHCl}_3$ ). HPLC (Chiralcel OD-H, hexane: *i*-PrOH = 91:9, flow rate: 1 mL/min,  $\lambda = 254$  nm),  $t_{\text{minor}} = 11.308$ ,  $t_{\text{major}} = 13.455$ .

<chromatogram>

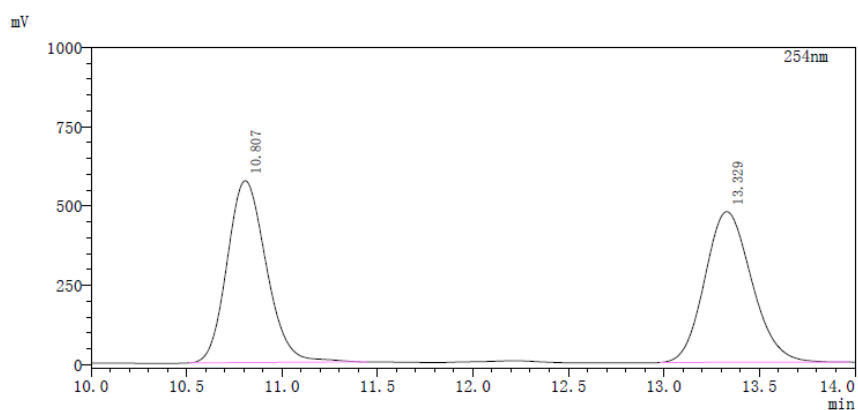

| Peak# | Ret. Time | Height  | Height% | Area     | Area%   |
|-------|-----------|---------|---------|----------|---------|
| 1     | 10.807    | 573320  | 54.710  | 8173327  | 50.171  |
| 2     | 13.329    | 474608  | 45.290  | 8117557  | 49.829  |
| Total |           | 1047928 | 100.000 | 16290884 | 100.000 |

<chromatogram>

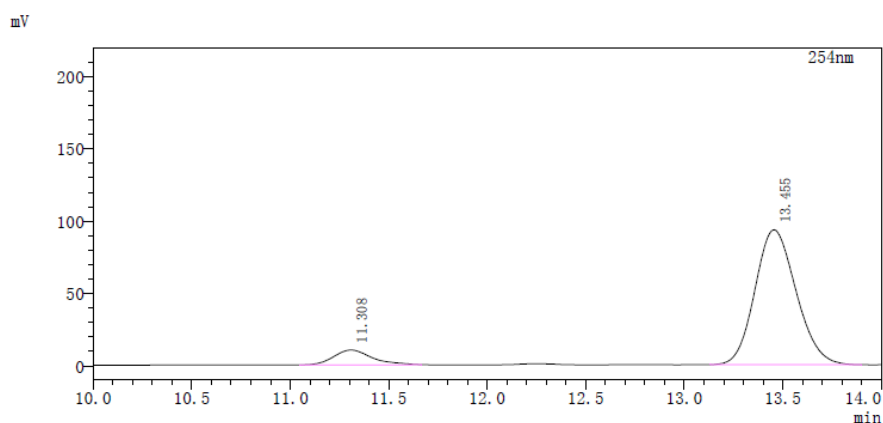

| Peak# | Ret. Time | Height | Height% | Area    | Area%   |
|-------|-----------|--------|---------|---------|---------|
| 1     | 11.308    | 10286  | 9.937   | 138610  | 9.270   |
| 2     | 13.455    | 93225  | 90.063  | 1356614 | 90.730  |
| Total |           | 103511 | 100.000 | 1495223 | 100.000 |

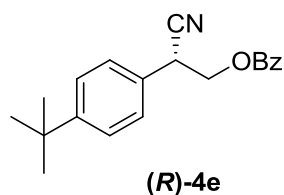

The reaction was conducted following the general procedure: the mixture of Cu(OAc)<sub>2</sub> (2.5 mol %), \***L13** (3.5 mol %), BPO (181.5 mg, 0.75 mmol, 1.5 equiv), TFEA (0.5 mL), TMSCN (0.75 mmol, 1.5 equiv), and 1-(tert-butyl)-4-vinylbenzene (0.5 mmol, 1 equiv) was stirred at rt for 24 hours, and **(R)-4e** was obtained (101 mg, 66% yield, 90:10 er).  $[\alpha]^{24.6}_D = 10.964$  (*c* 0.59, CHCl<sub>3</sub>). HPLC (Chiralcel OD-H, hexane: *i*-PrOH = 95:5, flow rate: 1 mL/min,  $\lambda = 254$  nm),  $t_{\text{minor}} = 8.675$ ,  $t_{\text{major}} = 10.051$ .

<chromatogram>

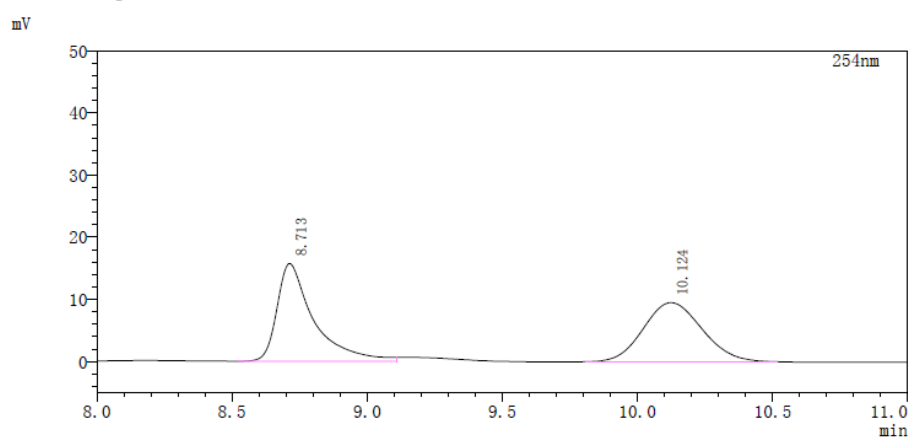

| Peak# | Ret. Time | Height | Height% | Area   | Area%   |
|-------|-----------|--------|---------|--------|---------|
| 1     | 8.713     | 15709  | 62.247  | 149350 | 50.896  |
| 2     | 10.124    | 9527   | 37.753  | 144089 | 49.104  |
| Total |           | 25236  | 100.000 | 293440 | 100.000 |

<chromatogram>

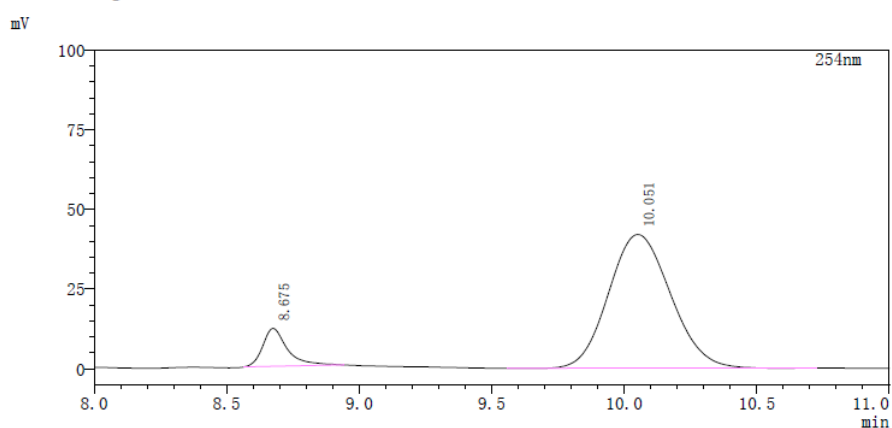

| Peak# | Ret. Time | Height | Height% | Area   | Area%   |
|-------|-----------|--------|---------|--------|---------|
| 1     | 8.675     | 11962  | 22.190  | 77432  | 10.193  |
| 2     | 10.051    | 41943  | 77.810  | 682252 | 89.807  |
| Total |           | 53904  | 100.000 | 759684 | 100.000 |

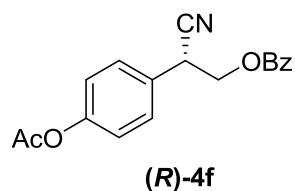

The reaction was conducted following the general procedure: the mixture of  $\text{Cu}(\text{OAc})_2$  (2.5 mol %), \***L13** (3.5 mol %), BPO (181.5 mg, 0.75 mmol, 1.5 equiv), TFEA (0.5 mL), TMSCN (0.75 mmol, 1.5 equiv), and 4-vinylphenyl acetate (0.5 mmol, 1 equiv) was stirred at rt for 24 hours, and **(R)-4f** was obtained (102 mg, 66% yield, 81:19 er).  $[\alpha]^{24.7}_{\text{D}} = -31.627$  ( $c$  0.35,  $\text{CHCl}_3$ ). HPLC (Chiralcel OD-H, hexane: *i*-PrOH = 90: 10, flow rate: 1 mL/min,  $\lambda = 254$  nm),  $t_{\text{minor}} = 27.204$ ,  $t_{\text{major}} = 28.266$ .

<chromatogram>

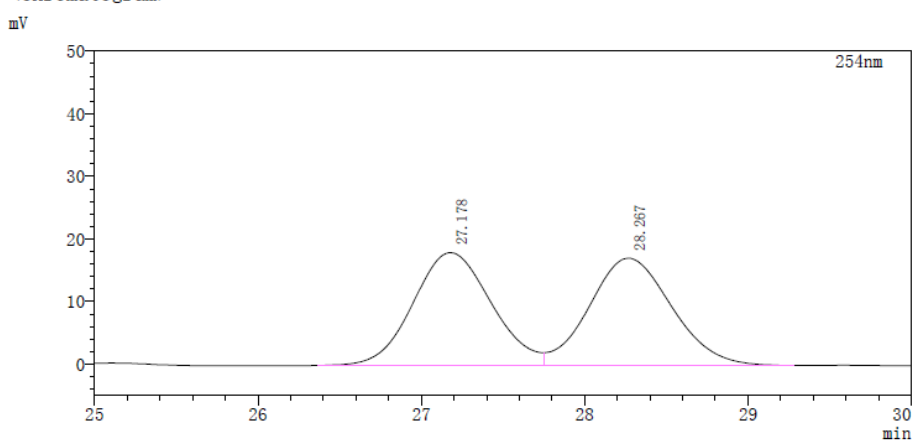

| Peak# | Ret. Time | Height | Height% | Area    | Area%   |
|-------|-----------|--------|---------|---------|---------|
| 1     | 27.178    | 18013  | 51.266  | 599308  | 49.996  |
| 2     | 28.267    | 17123  | 48.734  | 599413  | 50.004  |
| Total |           | 35136  | 100.000 | 1198721 | 100.000 |

<chromatogram>

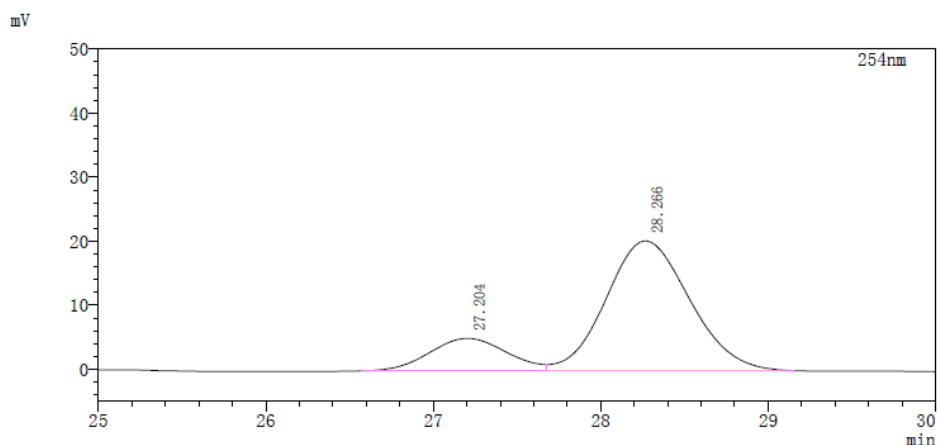

| Peak# | Ret. Time | Height | Height% | Area   | Area%   |
|-------|-----------|--------|---------|--------|---------|
| 1     | 27.204    | 5085   | 20.048  | 162973 | 18.782  |
| 2     | 28.266    | 20278  | 79.952  | 704744 | 81.218  |
| Total |           | 25362  | 100.000 | 867716 | 100.000 |



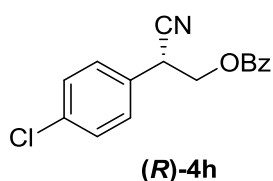

The reaction was conducted following the general procedure: the mixture of Cu(OAc)<sub>2</sub> (2.5 mol %), \***L13** (3.5 mol %), BPO (181.5 mg, 0.75 mmol, 1.5 equiv), TFEA (0.5 mL), TMSCN (0.75 mmol, 1.5 equiv), and 1-chloro-4-vinylbenzene (0.5 mmol, 1 equiv) was stirred at rt for 24 hours, and **(R)-4h** was obtained (88 mg, 62% yield, 88:12 er).  $[\alpha]^{24.5}_D = -25.986$  ( $c$  0.97, CHCl<sub>3</sub>). HPLC (Chiralcel OD-H, hexane: *i*-PrOH = 90: 10, flow rate: 1 mL/min,  $\lambda = 254$  nm),  $t_{\text{minor}} = 10.504$ ,  $t_{\text{major}} = 12.446$ .

<chromatogram>

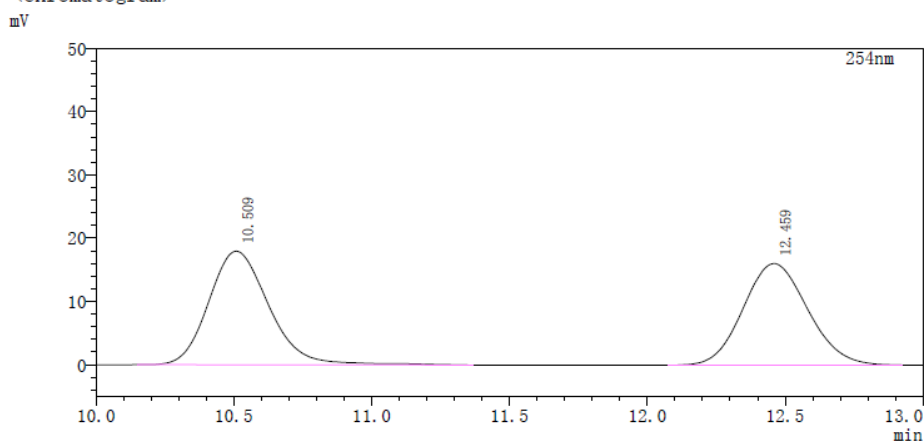

| Peak# | Ret. Time | Height | Height% | Area   | Area%   |
|-------|-----------|--------|---------|--------|---------|
| 1     | 10.509    | 17968  | 52.810  | 273467 | 51.134  |
| 2     | 12.459    | 16056  | 47.190  | 261333 | 48.866  |
| Total |           | 34024  | 100.000 | 534799 | 100.000 |

<chromatogram>

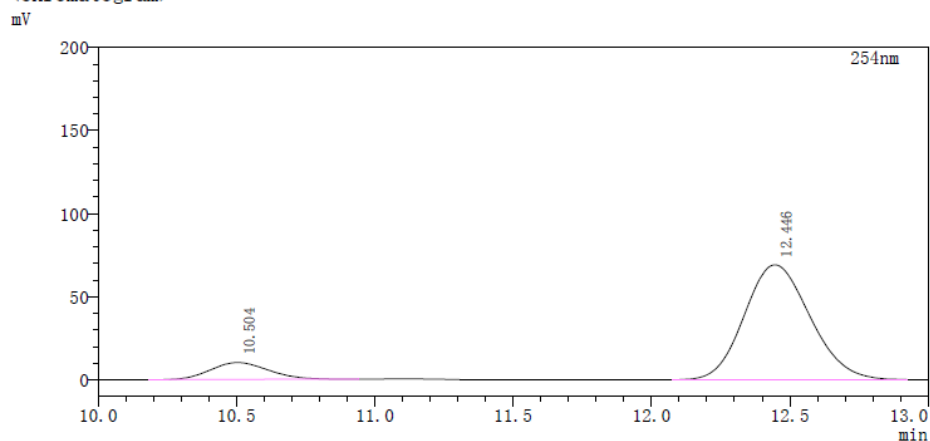

| Peak# | Ret. Time | Height | Height% | Area    | Area%   |
|-------|-----------|--------|---------|---------|---------|
| 1     | 10.504    | 10184  | 12.839  | 148921  | 11.541  |
| 2     | 12.446    | 69141  | 87.161  | 1141408 | 88.459  |
| Total |           | 79326  | 100.000 | 1290328 | 100.000 |

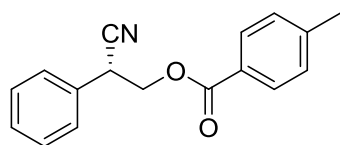

**(R)-7a**

The reaction was conducted following the general procedure: the mixture of Cu(OAc)<sub>2</sub> (2.5 mol %), \***L13** (3.5 mol %), 4-methylbenzoic peroxyanhydride (0.75 mmol, 1.5 equiv), TFEA (0.5 mL), TMSCN (0.75 mmol, 1.5 equiv), and styrene (0.5 mmol, 1 equiv) was stirred at rt for 24 hours, and **(R)-7a** was obtained (89 mg, 67% yield, 90.5:9.5 er).  $[\alpha]^{24.7}_D = 37.425$  (*c* 1.65, CHCl<sub>3</sub>). Chiralcel (Chiralcel OD-H, hexane: *i*-PrOH = 90: 10, flow rate: 1 mL/min,  $\lambda = 254$  nm),  $t_{\text{major}} = 11.553$ ,  $t_{\text{minor}} = 14.060$ .

<chromatogram>

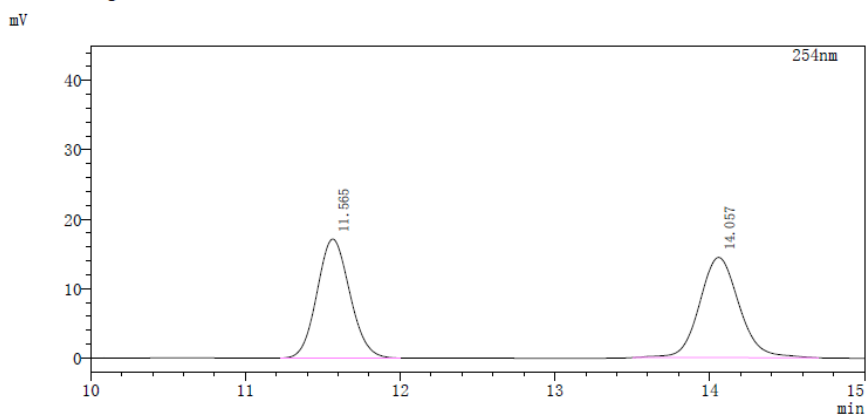

| Peak# | Ret. Time | Height | Height% | Area   | Area%   |
|-------|-----------|--------|---------|--------|---------|
| 1     | 11.565    | 17143  | 54.258  | 252649 | 49.624  |
| 2     | 14.057    | 14452  | 45.742  | 256482 | 50.376  |
| Total |           | 31595  | 100.000 | 509131 | 100.000 |

<chromatogram>

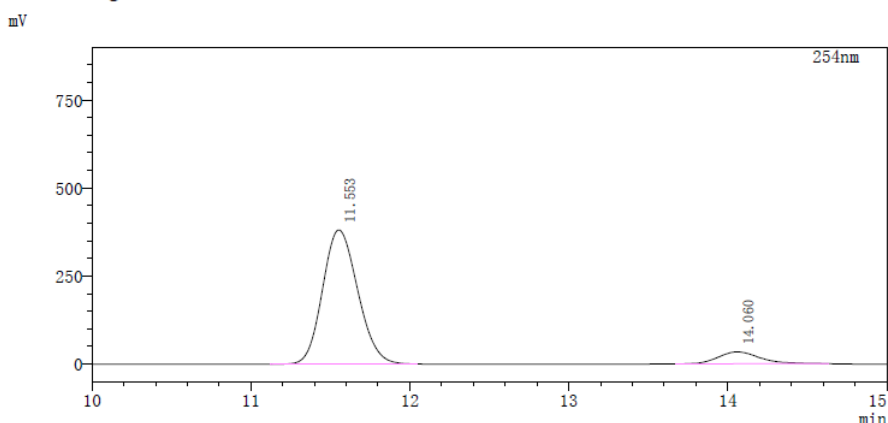

| Peak# | Ret. Time | Height | Height% | Area    | Area%   |
|-------|-----------|--------|---------|---------|---------|
| 1     | 11.553    | 380991 | 91.860  | 5859226 | 90.470  |
| 2     | 14.060    | 33762  | 8.140   | 617223  | 9.530   |
| Total |           | 414753 | 100.000 | 6476449 | 100.000 |

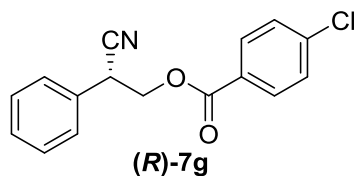

The reaction was conducted following the general procedure: the mixture of  $\text{Cu}(\text{OAc})_2$  (2.5 mol %), \***L13** (3.5 mol %), 4-chlorobenzoic peroxyanhydride (0.75 mmol, 1.5 equiv), TFEA (0.5 mL), TMS-CN (0.75 mmol, 1.5 equiv), and styrene (0.5 mmol, 1 equiv) was stirred at rt for 24 hours, and **(R)-7g** was obtained (71 mg, 46% yield, 86:14 er).  $[\alpha]^{24.7}_{\text{D}} = 31.391$  ( $c$  0.41,  $\text{CHCl}_3$ ).  $^1\text{H NMR}$  (400 MHz,  $\text{CDCl}_3$ )  $\delta$  7.99 (d,  $J = 8.6$  Hz, 1H), 7.54 – 7.36 (m, 4H), 4.66 (dd,  $J = 10.9, 5.6$  Hz, 1H), 4.51 (dd,  $J = 10.9, 8.5$  Hz, 1H), 4.32 (dd,  $J = 8.5, 5.6$  Hz, 1H).  $^{13}\text{C NMR}$  (100 MHz,  $\text{CDCl}_3$ )  $\delta$  165.02, 140.16, 131.31, 131.20, 129.44, 129.06, 128.98, 127.78, 127.48, 118.46, 65.64, 37.53. IR (thin film):  $\nu$  2248, 1725  $\text{cm}^{-1}$ . HRMS (ESI) calcd for  $[\text{C}_{16}\text{H}_{12}\text{ClNNaO}_2]^+$  ( $[\text{M}+\text{Na}]^+$ ): 308.0454, found: 308.0448. HPLC (Chiralcel IC, hexane/*i*-PrOH = 95:5, flow rate: 1 mL/min,  $\lambda = 254$  nm),  $t_{\text{major}} = 12.158$ ,  $t_{\text{minor}} = 14.009$ .

<chromatogram>

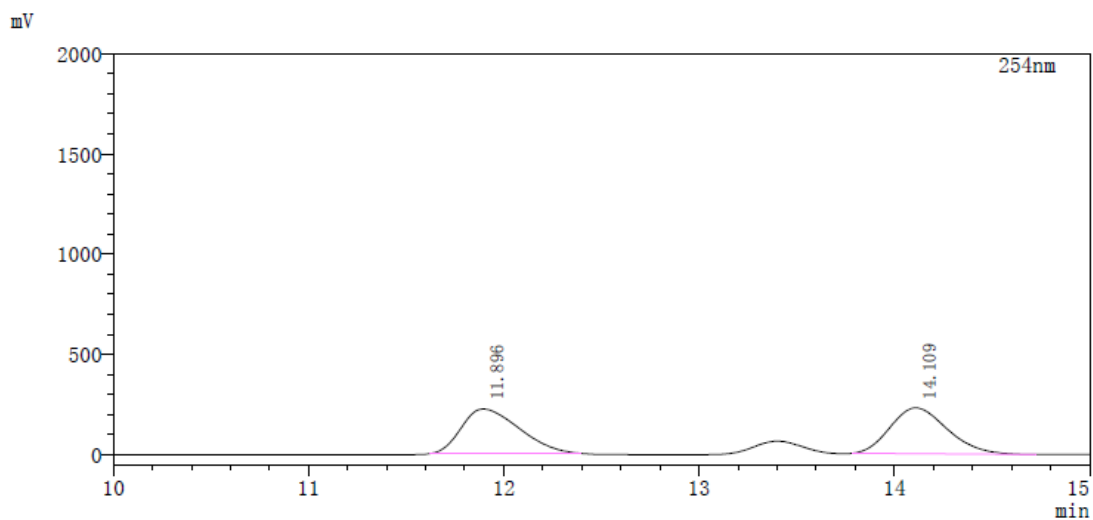

| Peak# | Ret. Time | Height | Height% | Area    | Area%   |
|-------|-----------|--------|---------|---------|---------|
| 1     | 11.896    | 221822 | 49.257  | 4548611 | 49.451  |
| 2     | 14.109    | 228511 | 50.743  | 4649546 | 50.549  |
| Total |           | 450333 | 100.000 | 9198157 | 100.000 |

<Chromatogram>

mV

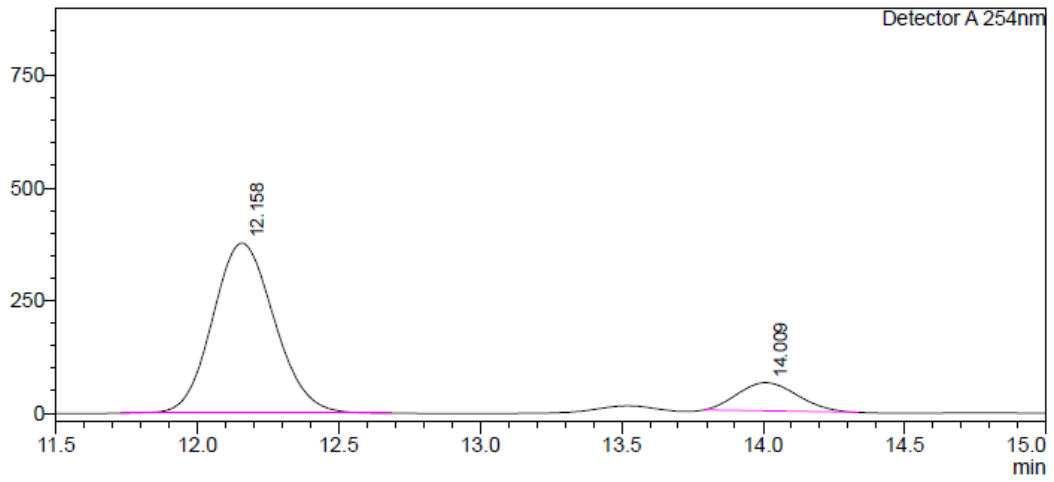

| Peak# | Ret. Time | Height | Height% | Area    | Area%   |
|-------|-----------|--------|---------|---------|---------|
| 1     | 12.158    | 377570 | 85.810  | 5743052 | 86.192  |
| 2     | 14.009    | 62438  | 14.190  | 920032  | 13.808  |
| Total |           | 440008 | 100.000 | 6663084 | 100.000 |

## Single crystal data of (*R*)-4e

CCDC 2040065 (*R*)-4e contains the supplementary crystallographic data (dimer). Crystal data and structure refinements of (*R*)-4e is listed in Table S2. These data can be obtained free of charge from the Cambridge Crystallographic Data Centre via <https://www.ccdc.cam.ac.uk/>

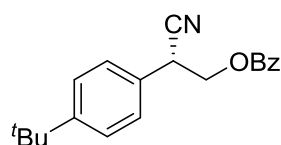

Table S2. Crystal data and structure refinement for (*R*)-4e.

|                                            |                                                               |                        |
|--------------------------------------------|---------------------------------------------------------------|------------------------|
| Identification code                        | ( <i>R</i> )-4e                                               |                        |
| Empirical formula                          | C <sub>20</sub> H <sub>21</sub> NO <sub>2</sub>               |                        |
| Formula weight                             | 307.38                                                        |                        |
| Temperature (K)                            | 100(2)                                                        |                        |
| Wavelength (Å)                             | 1.54178                                                       |                        |
| Crystal system                             | monoclinic                                                    |                        |
| Space group                                | P2 <sub>1</sub>                                               |                        |
| Unit cell dimensions (Å, °)                | <i>a</i> = 9.4303(5)                                          | $\alpha$ = 90          |
|                                            | <i>b</i> = 19.9537(11)                                        | $\beta$ = 111.9060(10) |
|                                            | <i>c</i> = 9.8206(5)                                          | $\gamma$ = 90          |
| Volume (Å <sup>3</sup> )                   | 1714.51(16)                                                   |                        |
| <i>Z</i>                                   | 4                                                             |                        |
| Calculated density (g cm <sup>-3</sup> )   | 1.191                                                         |                        |
| Absorption coefficient (mm <sup>-1</sup> ) | 0.605                                                         |                        |
| <i>F</i> <sub>000</sub>                    | 656                                                           |                        |
| Crystal size (mm <sup>3</sup> )            | × ×                                                           |                        |
| $\theta$ range for data collection (°)     | 4.432 to 72.480                                               |                        |
| Miller index ranges                        | -11 ≤ <i>h</i> ≤ 10, -24 ≤ <i>k</i> ≤ 24, -12 ≤ <i>l</i> ≤ 12 |                        |
| Reflections collected                      | 32674                                                         |                        |
| Independent reflections                    | 6739 [ <i>R</i> <sub>int</sub> = 0.0377]                      |                        |
| Completeness to $\theta_{\max}$ (%)        | 0.995                                                         |                        |
| Max. and min. transmission                 | and                                                           |                        |
| Refinement method                          | Full-matrix least-squares on <i>F</i> <sup>2</sup>            |                        |

|                                                      |                                |
|------------------------------------------------------|--------------------------------|
| Data / restraints / parameters                       | 6739 / 2 / 443                 |
| Goodness-of-fit on $F^2$                             | 1.052                          |
| Final $R$ indices [ $I > 2\sigma(I)$ ]               | $R1 = 0.0354$ , $wR2 = 0.0864$ |
| $R$ indices (all data)                               | $R1 = 0.0356$ , $wR2 = 0.0866$ |
| Extinction coefficient                               | 0.0041(7)                      |
| Largest diff. peak and hole ( $e \text{ \AA}^{-3}$ ) | 0.321 and -0.221               |
| Absolute structure parameter                         | .11(5)                         |

## References

- 1 B. Qian, S. Chen, T. Wang, X. Zhang and H. Bao, Iron-Catalyzed Carboamination of Olefins: Synthesis of Amines and Disubstituted beta-Amino Acids, *J. Am. Chem. Soc.*, 2017, **139**, 13076.
- 2 X. Ji, B. Gao, X. Zhou, Z. Liu and H. Huang, Palladium-Catalyzed Regioselective Hydroaminocarbonylation of Alkynes to alpha,beta-Unsaturated Primary Amides with Ammonium Chloride, *J. Org. Chem.*, 2018, **83**, 10134.
- 3 E. Farber, J. Herget, J. A. Gascon and A. R. Howell, Unexpected cleavage of 2-azido-2-(hydroxymethyl)oxetanes: conformation determines reaction pathway?, *J. Org. Chem.*, 2010, **75**, 7565.
- 4 A. L. Fuentes de Arriba, E. Lenci, M. Sonawane, O. Formery and D. J. Dixon, Iridium-Catalyzed Reductive Strecker Reaction for Late-Stage Amide and Lactam Cyanation, *Angew. Chem. Int. Ed.*, 2017, **56**, 3655.

# NMR spectra

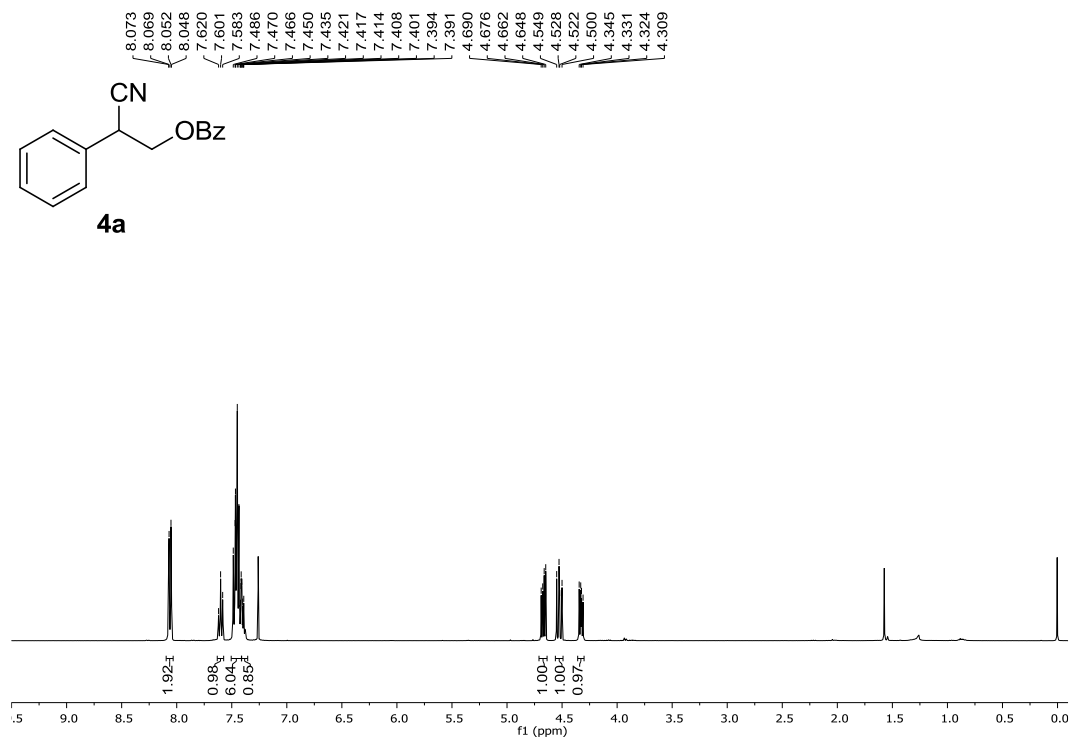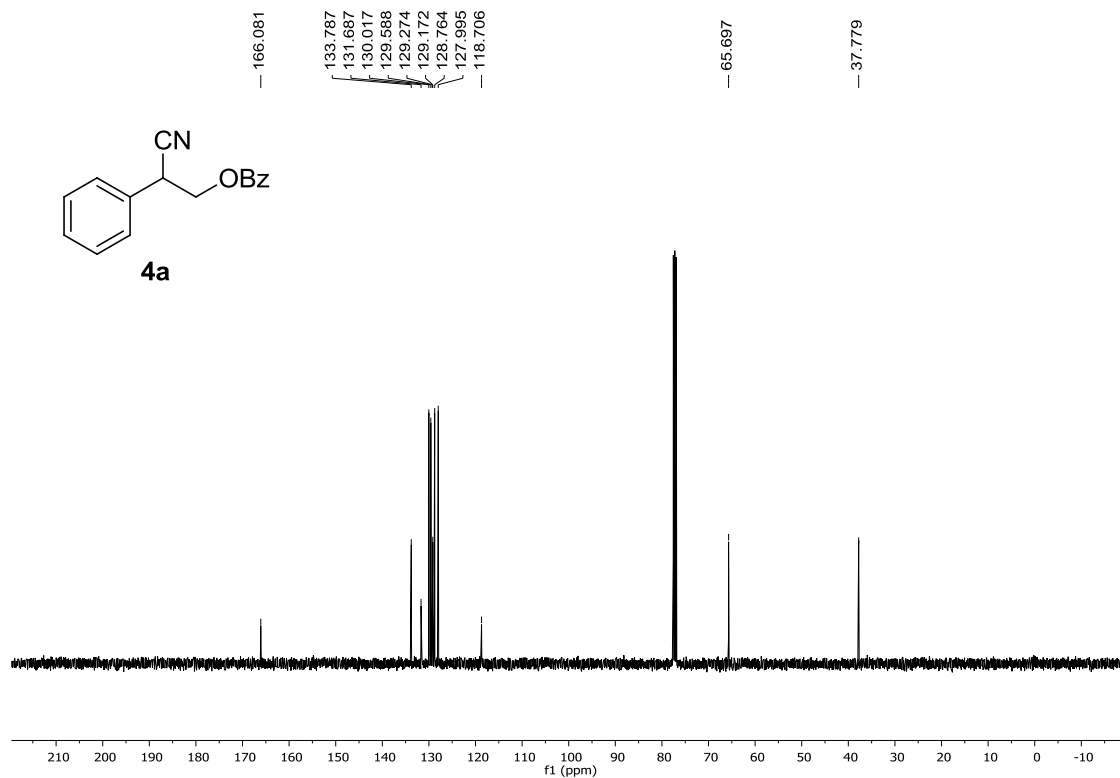



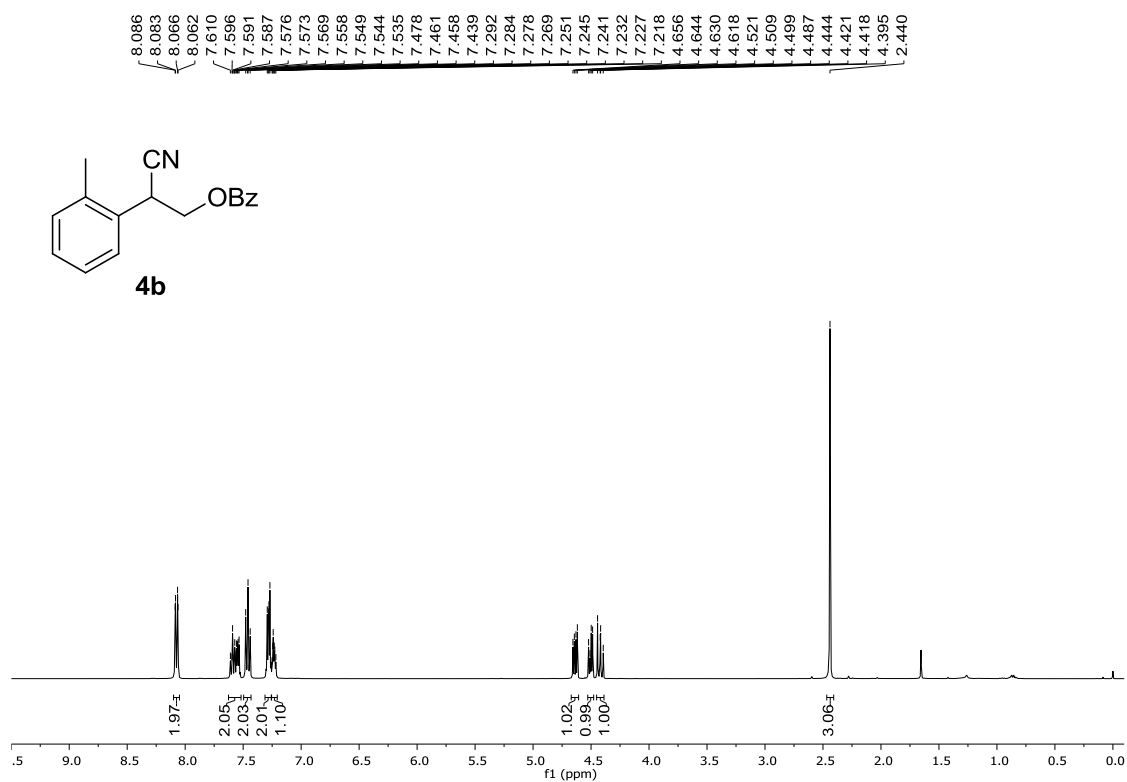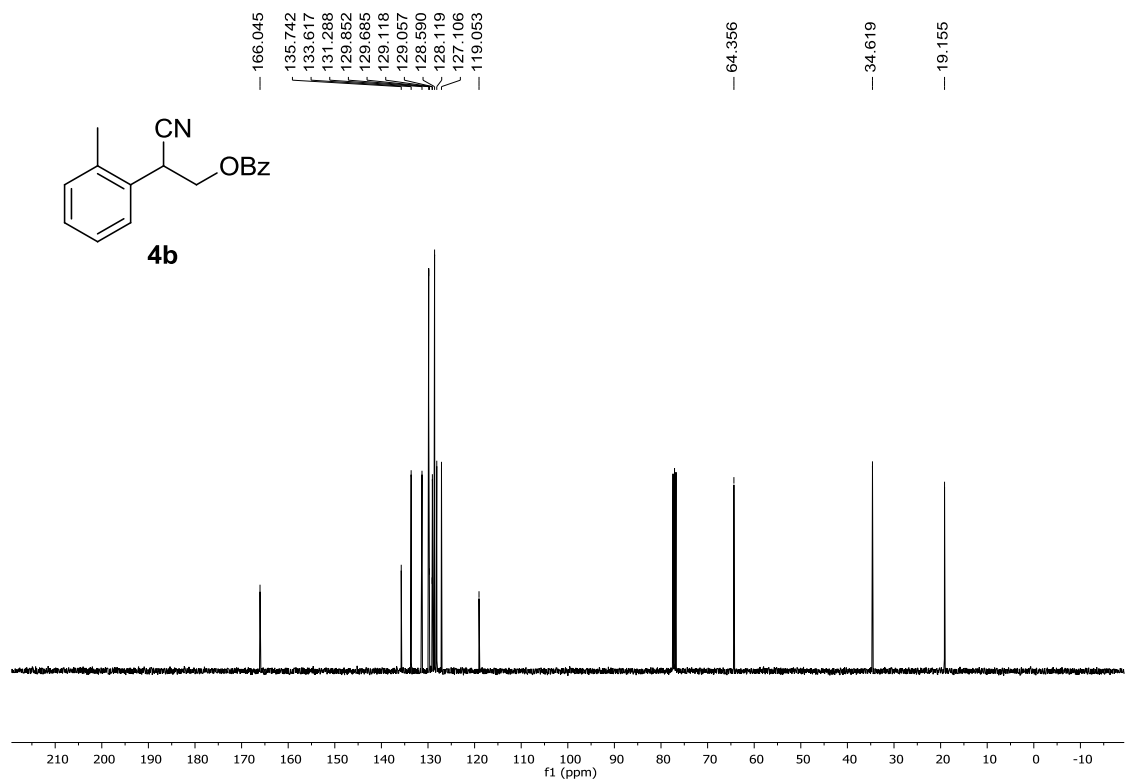

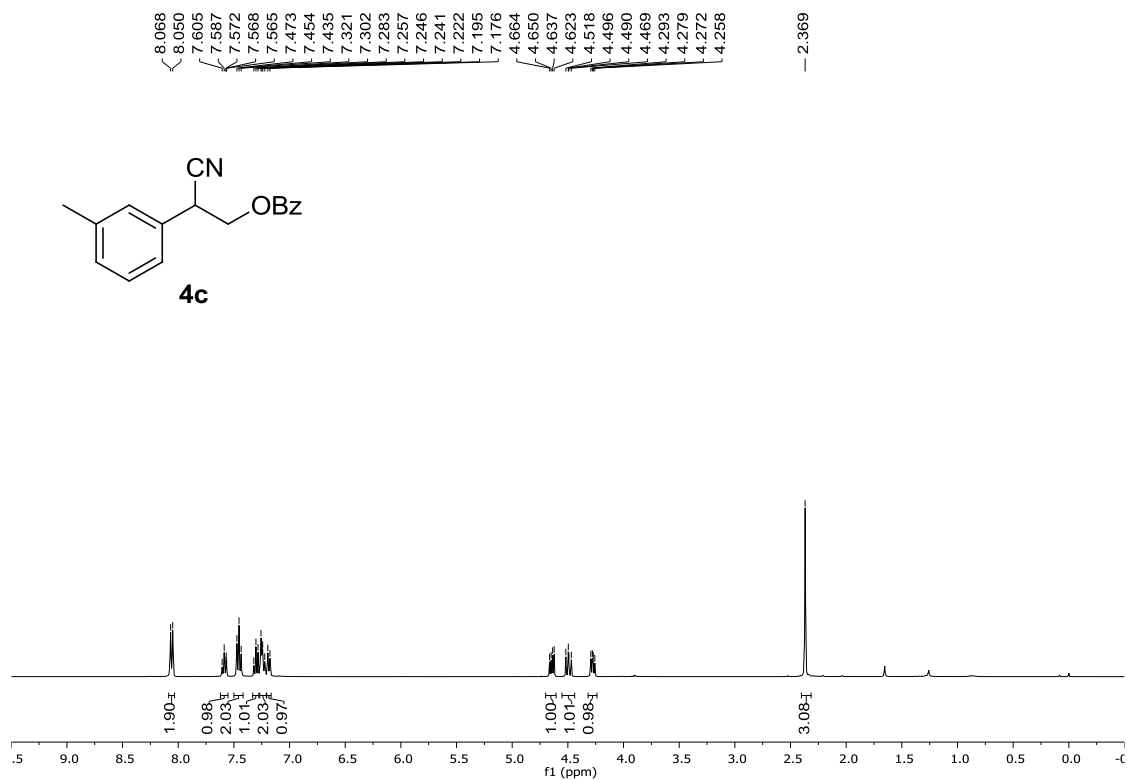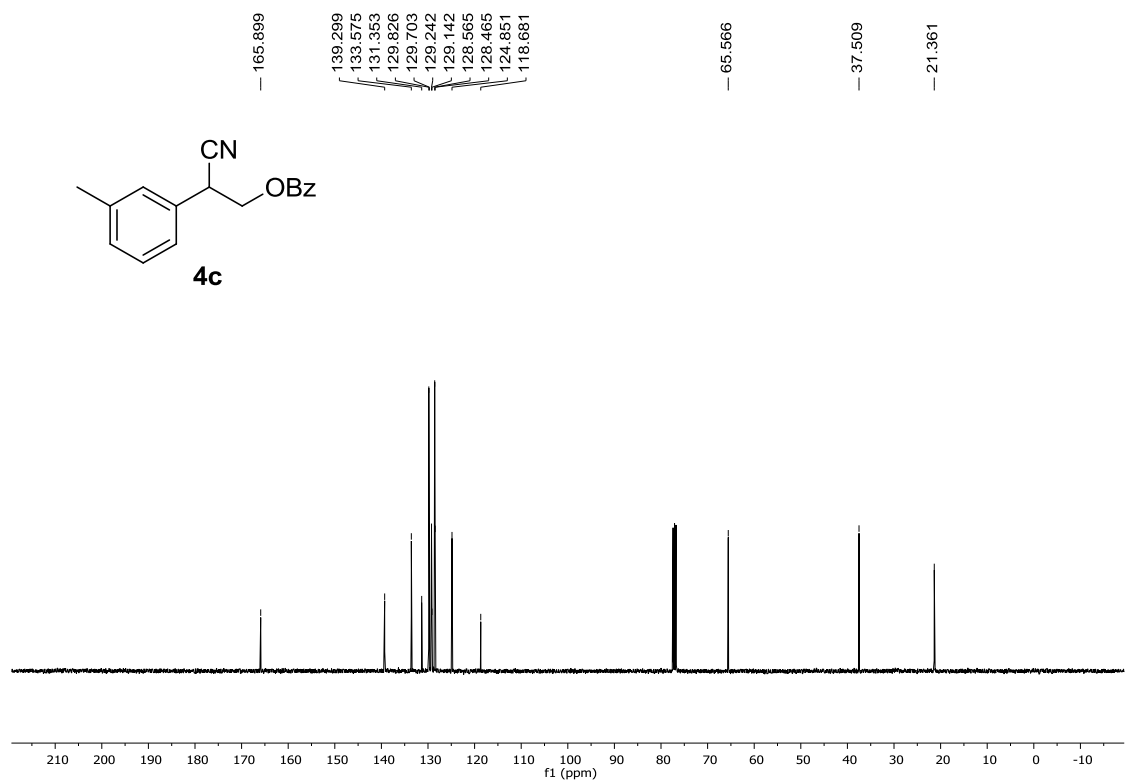

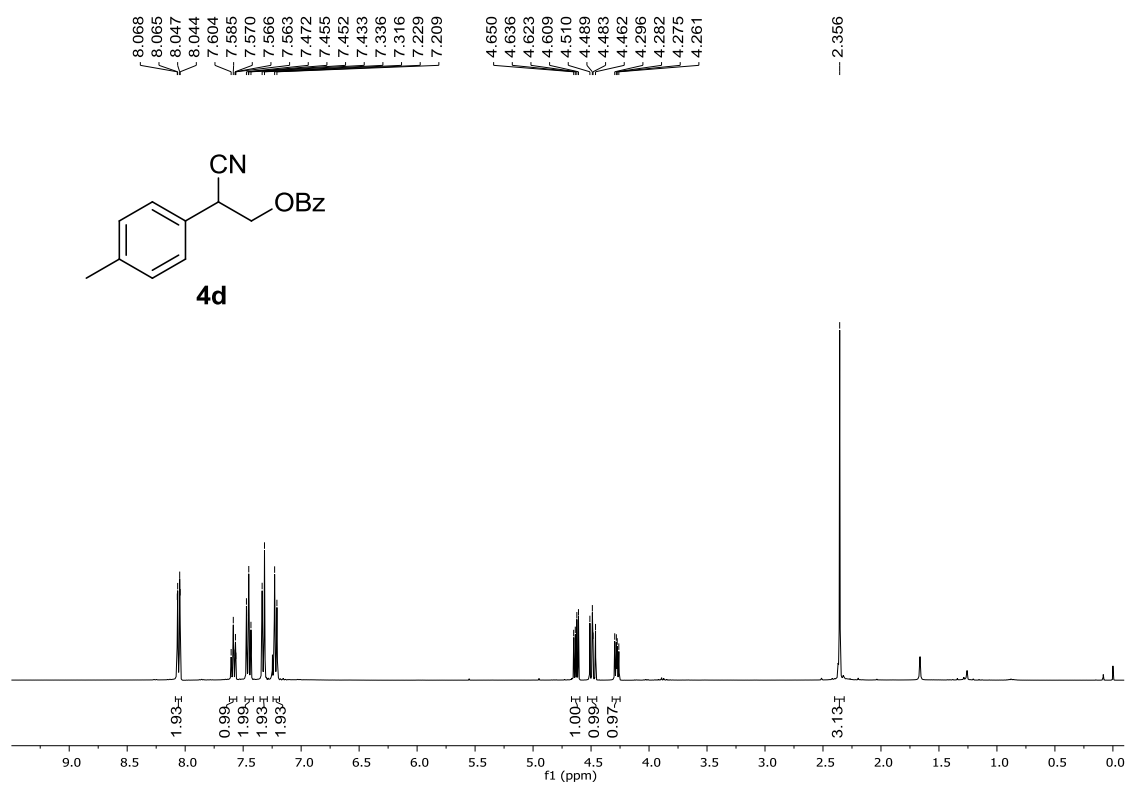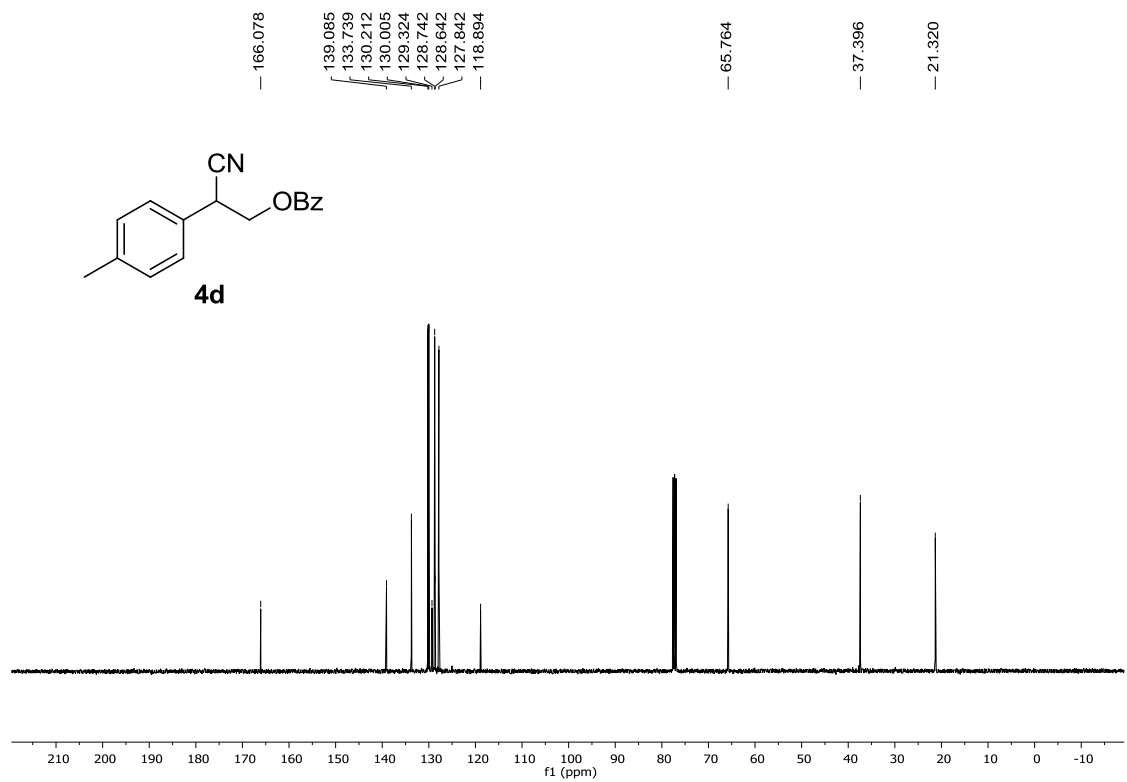

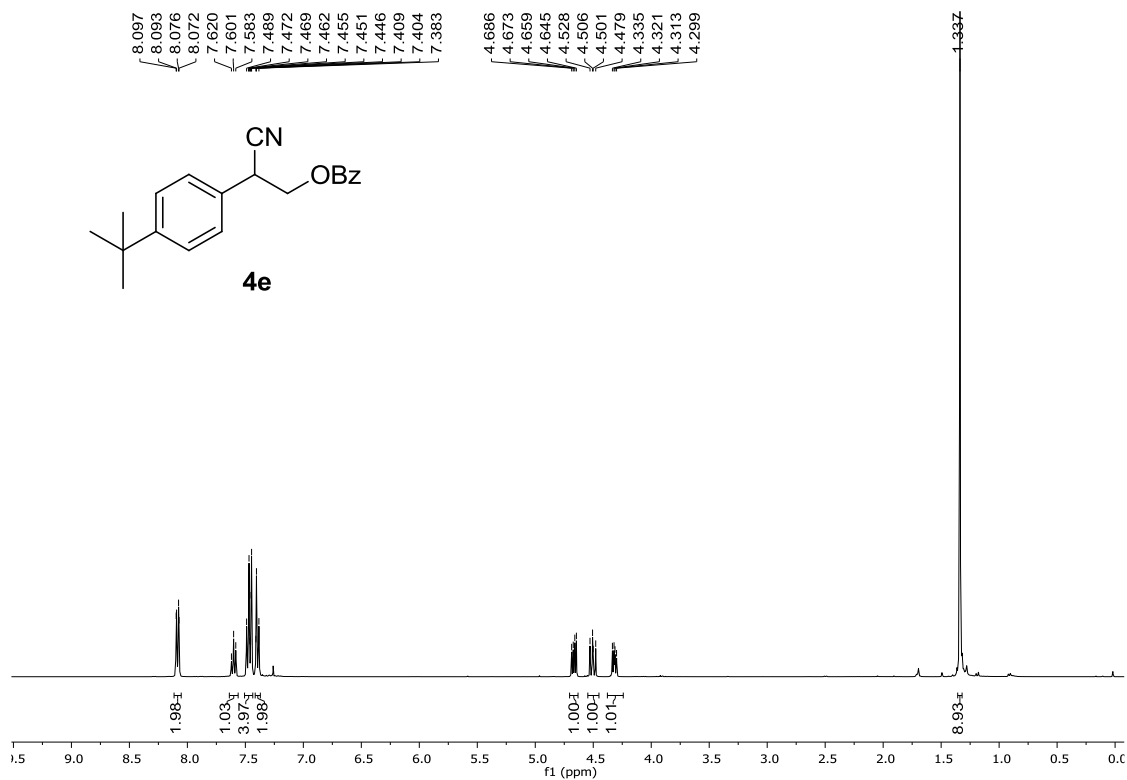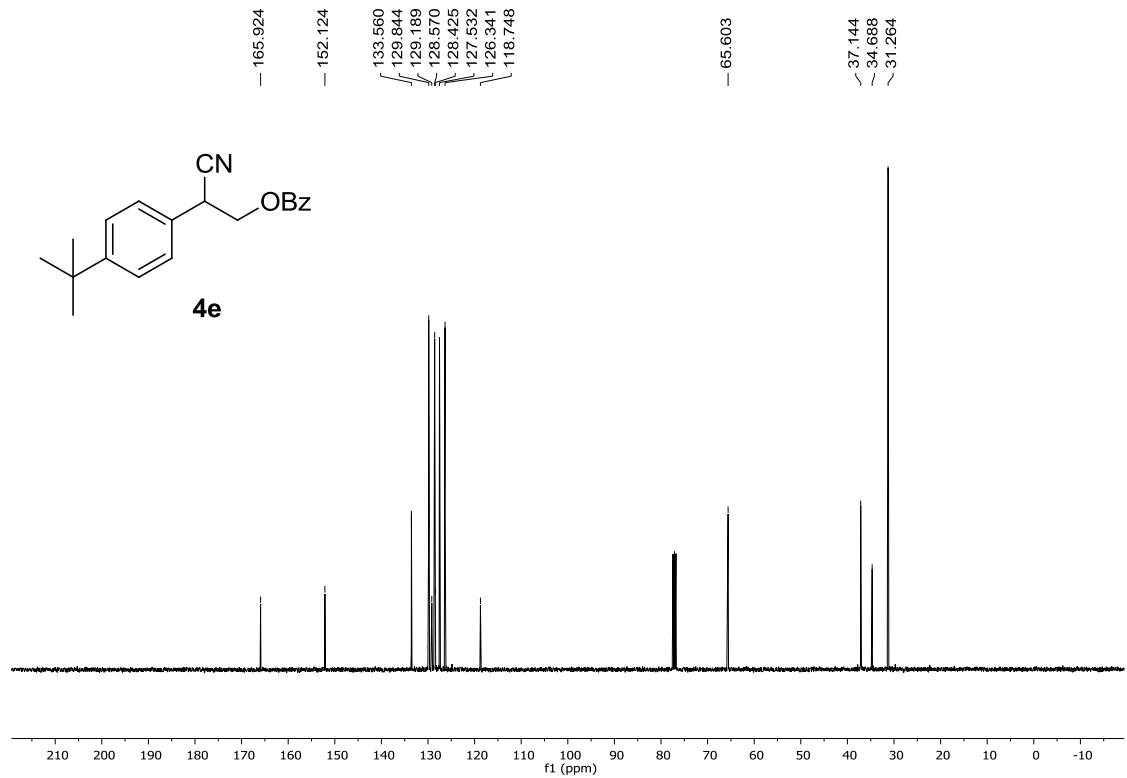

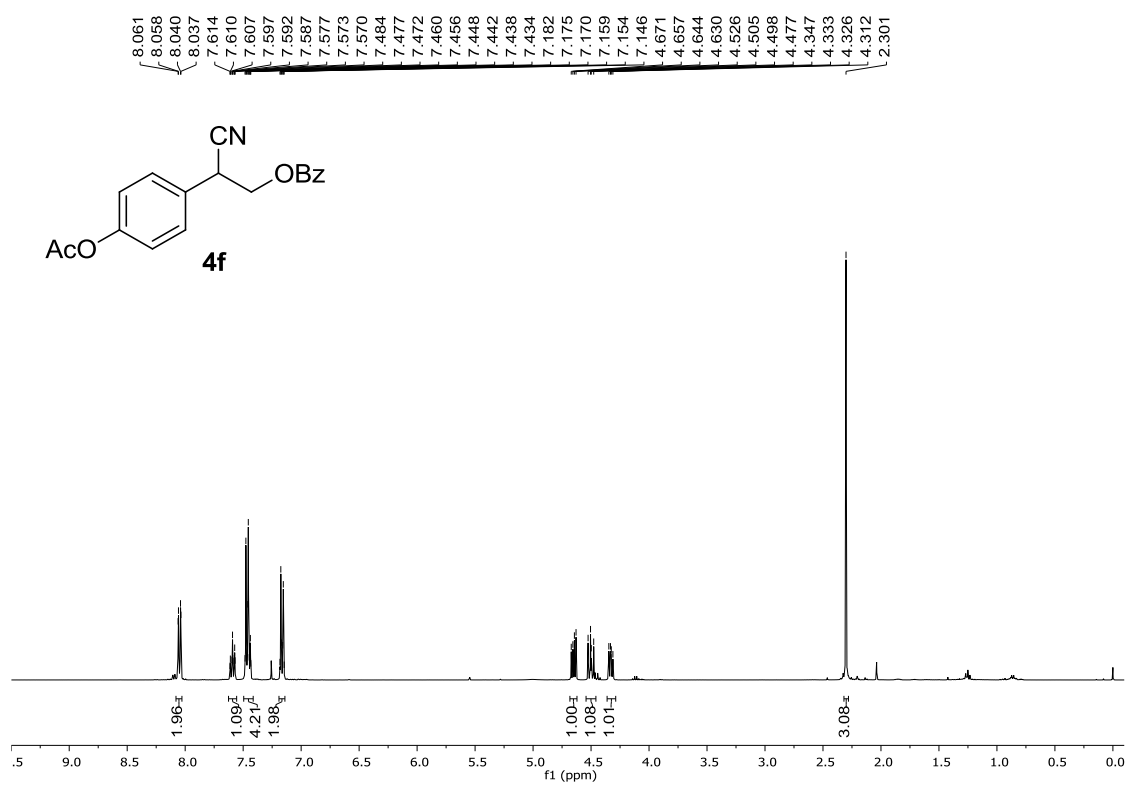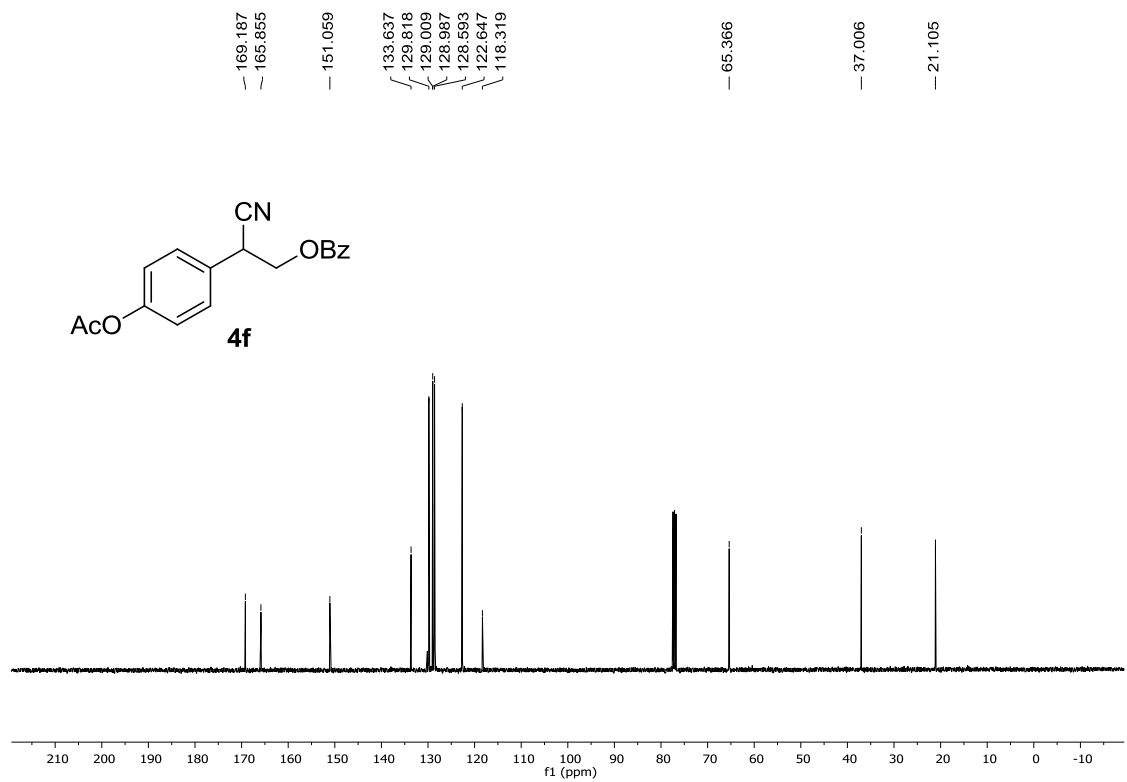

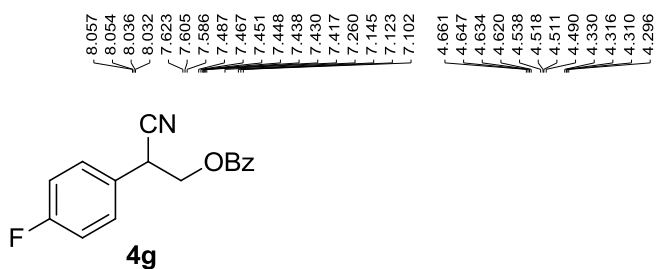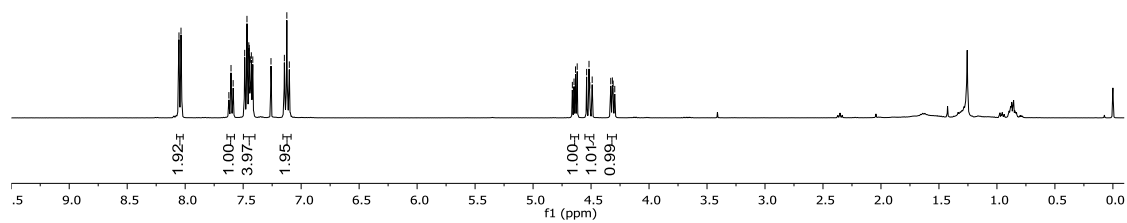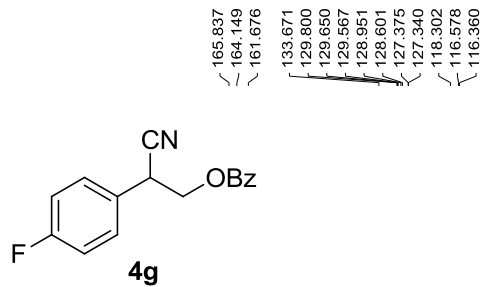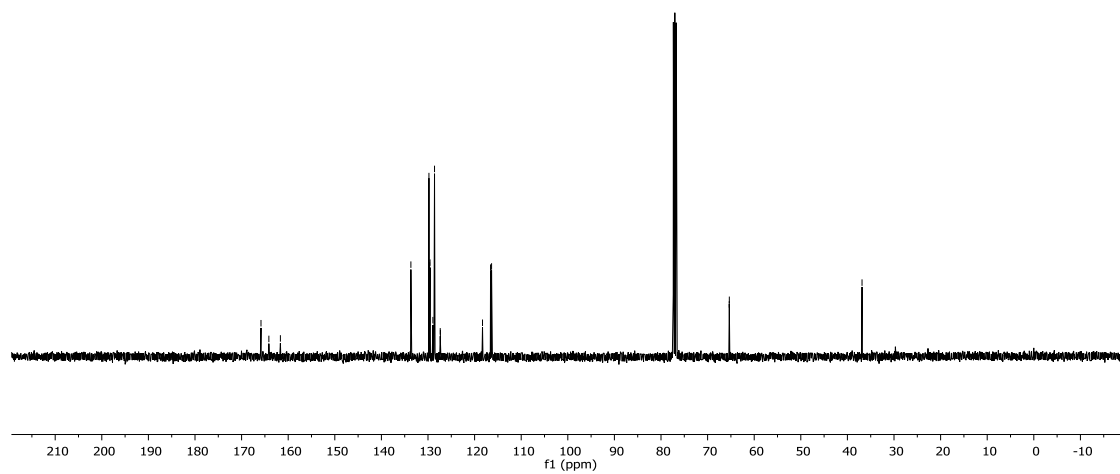

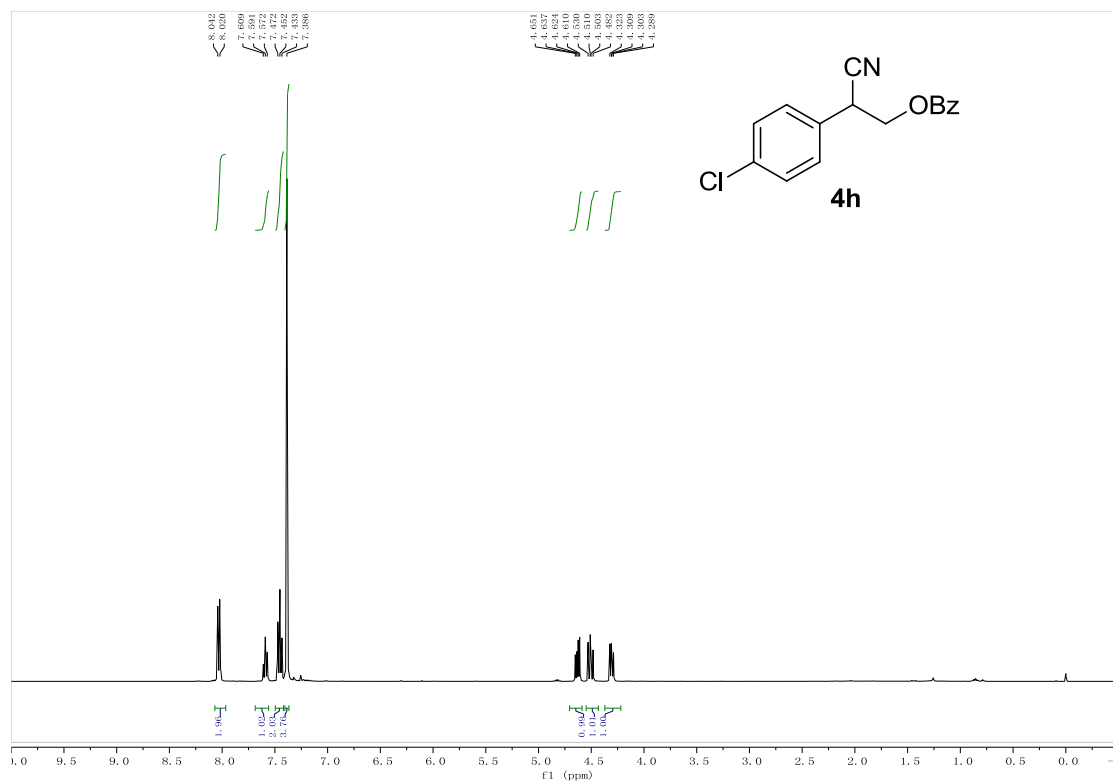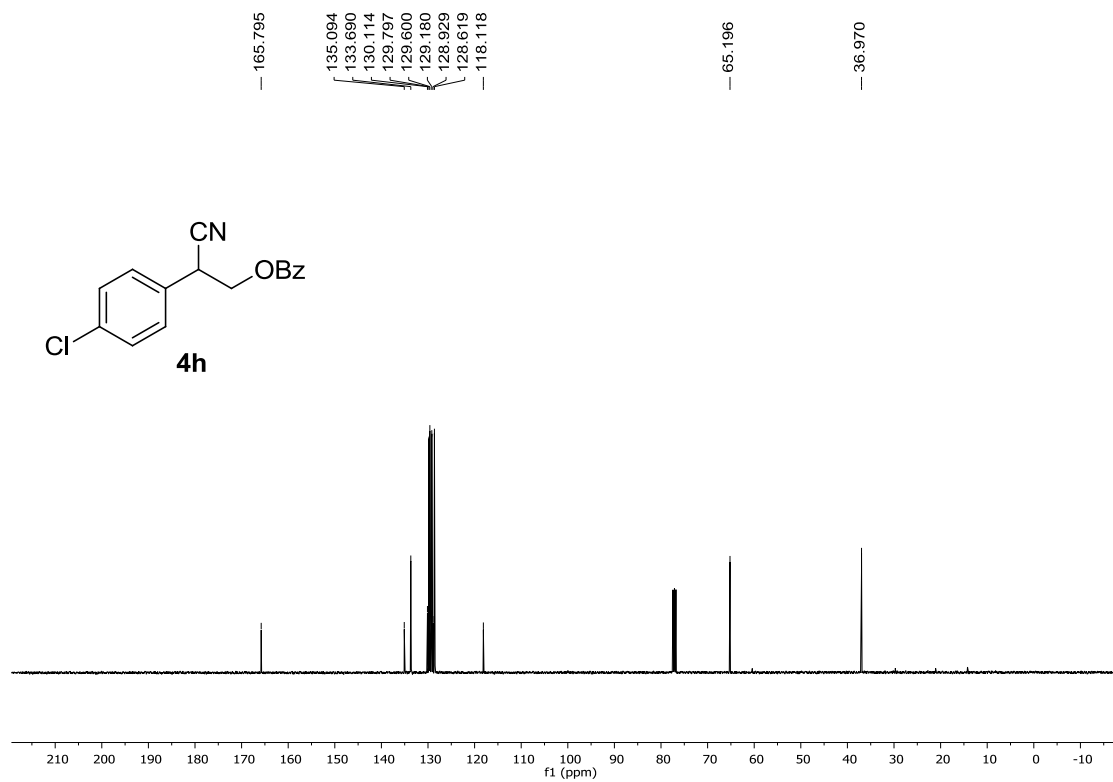

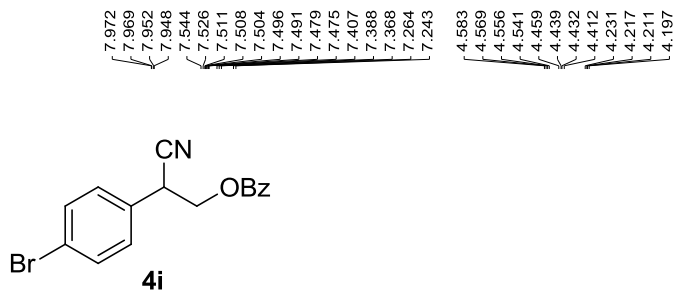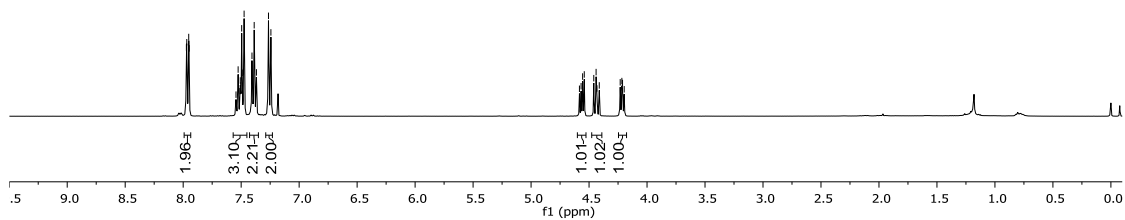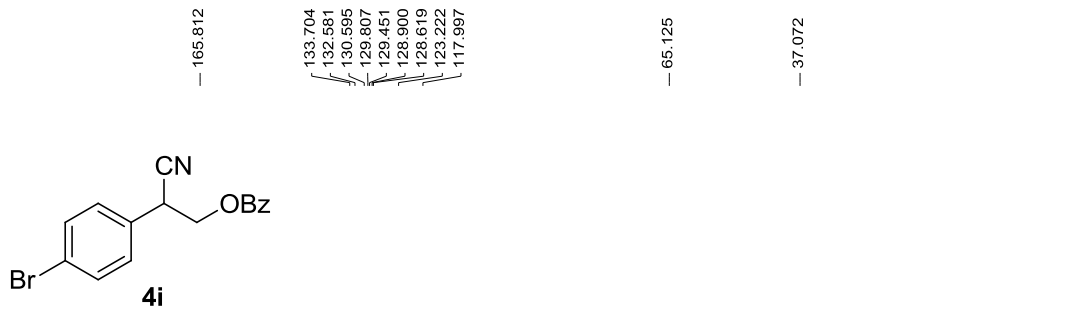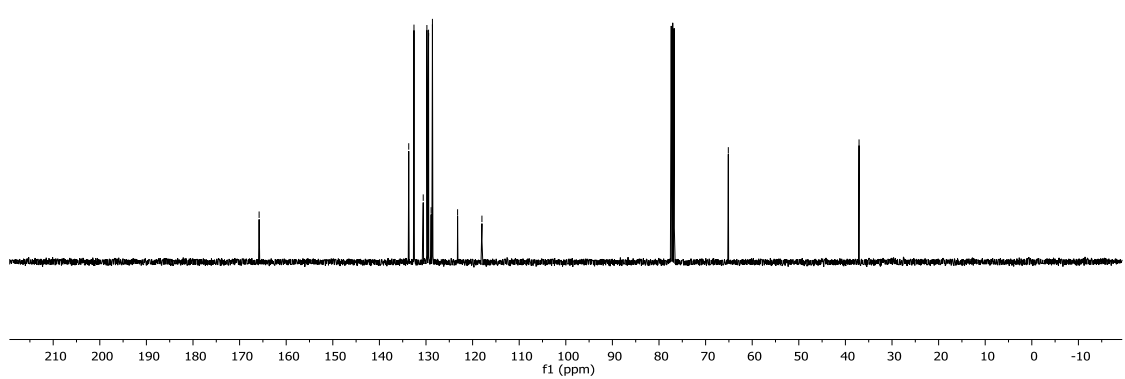



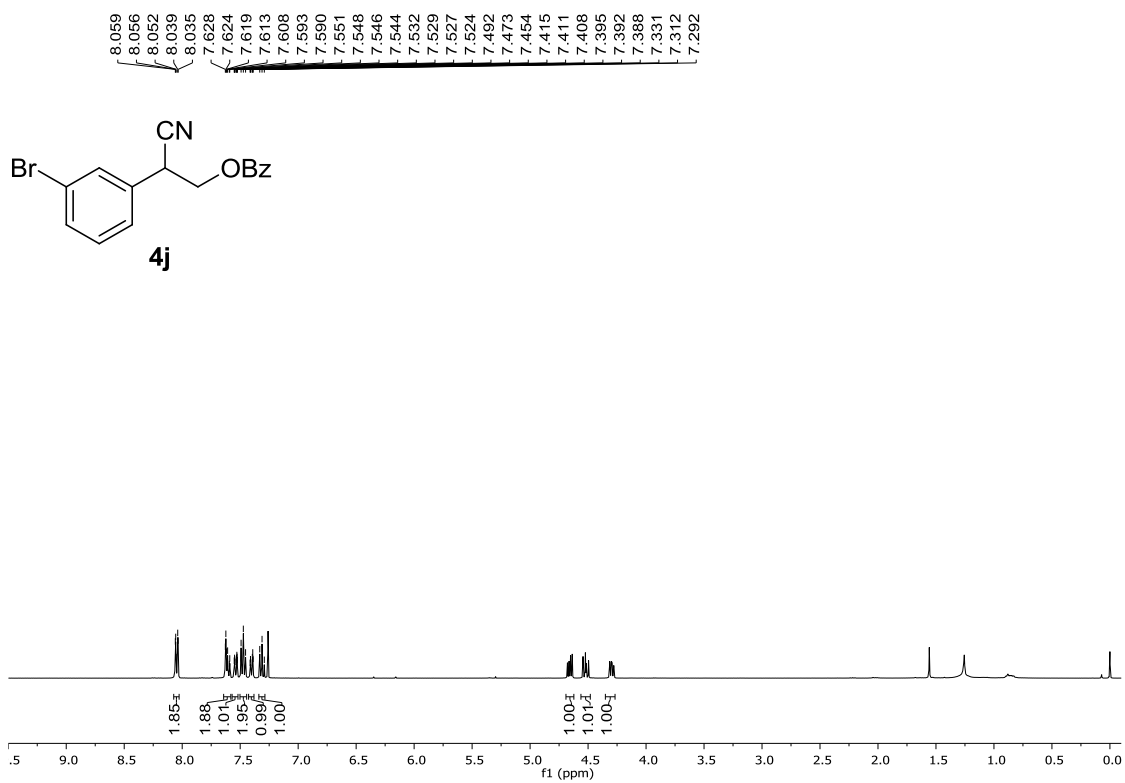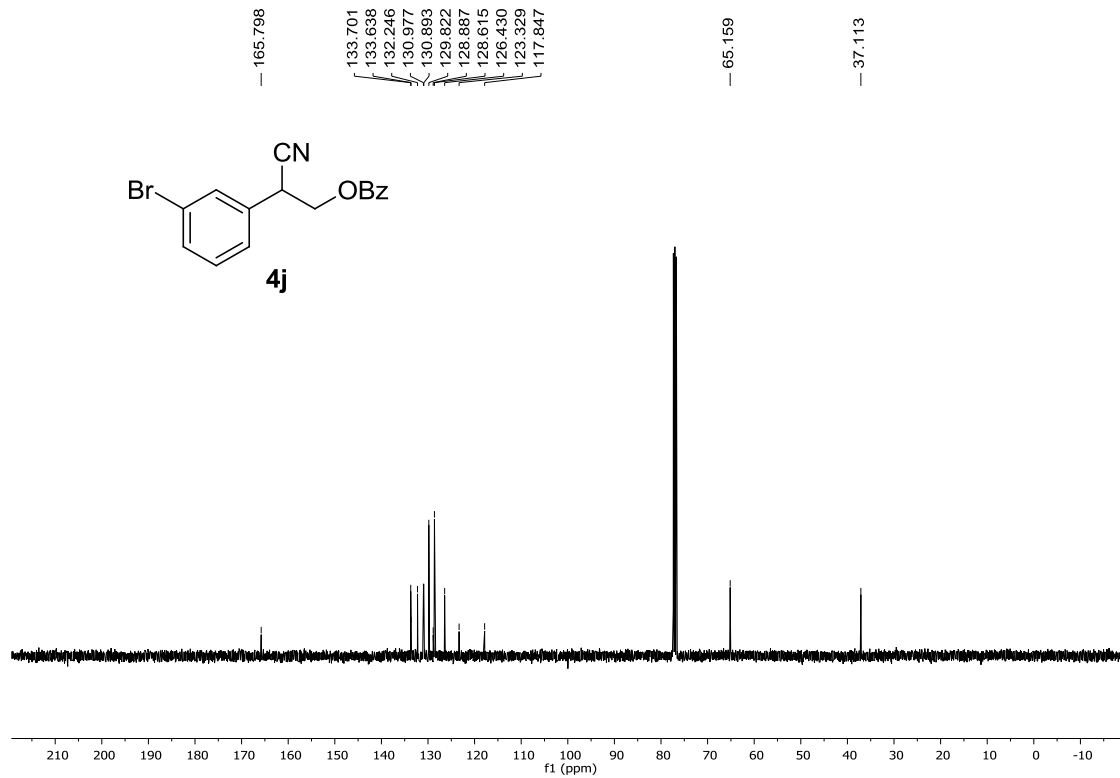

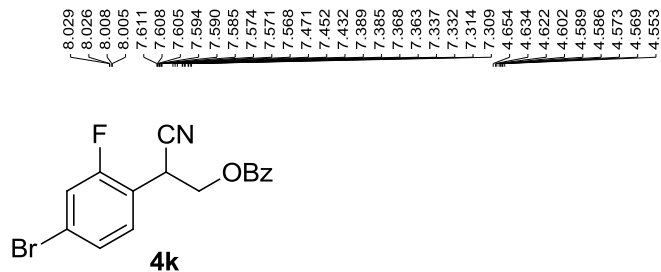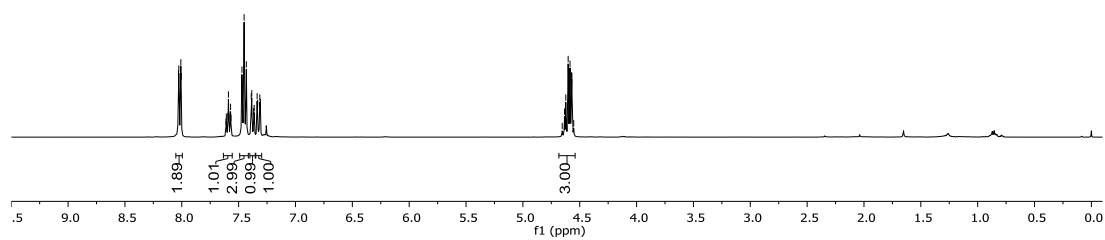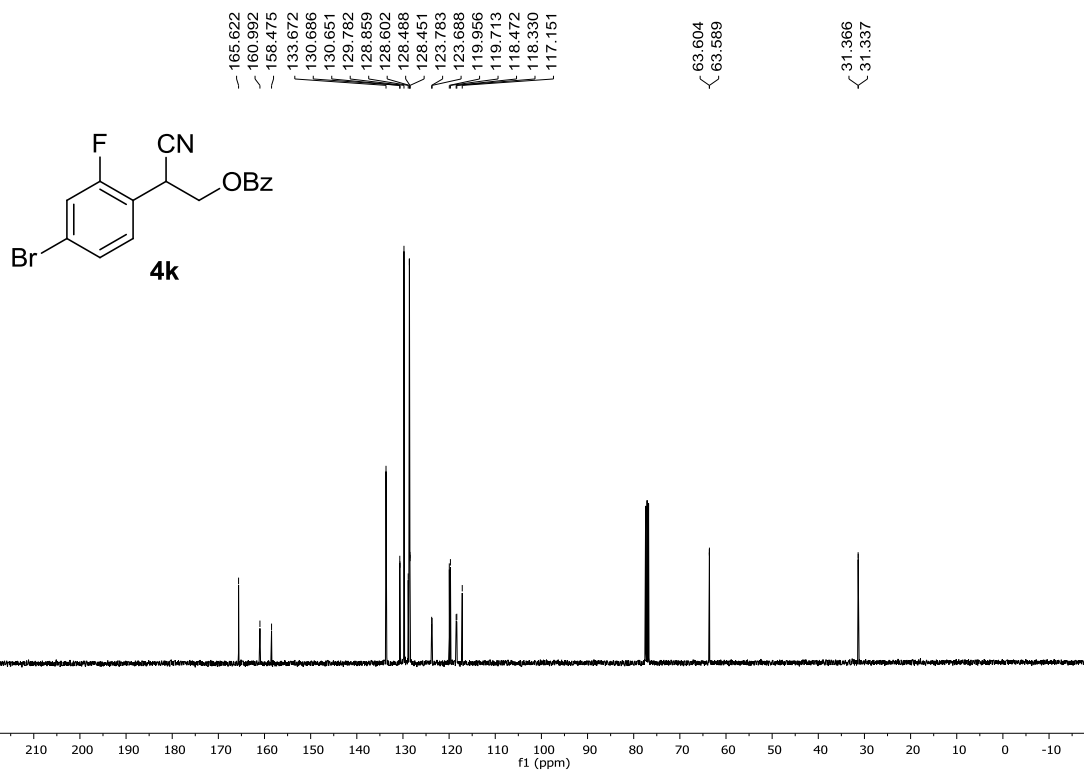

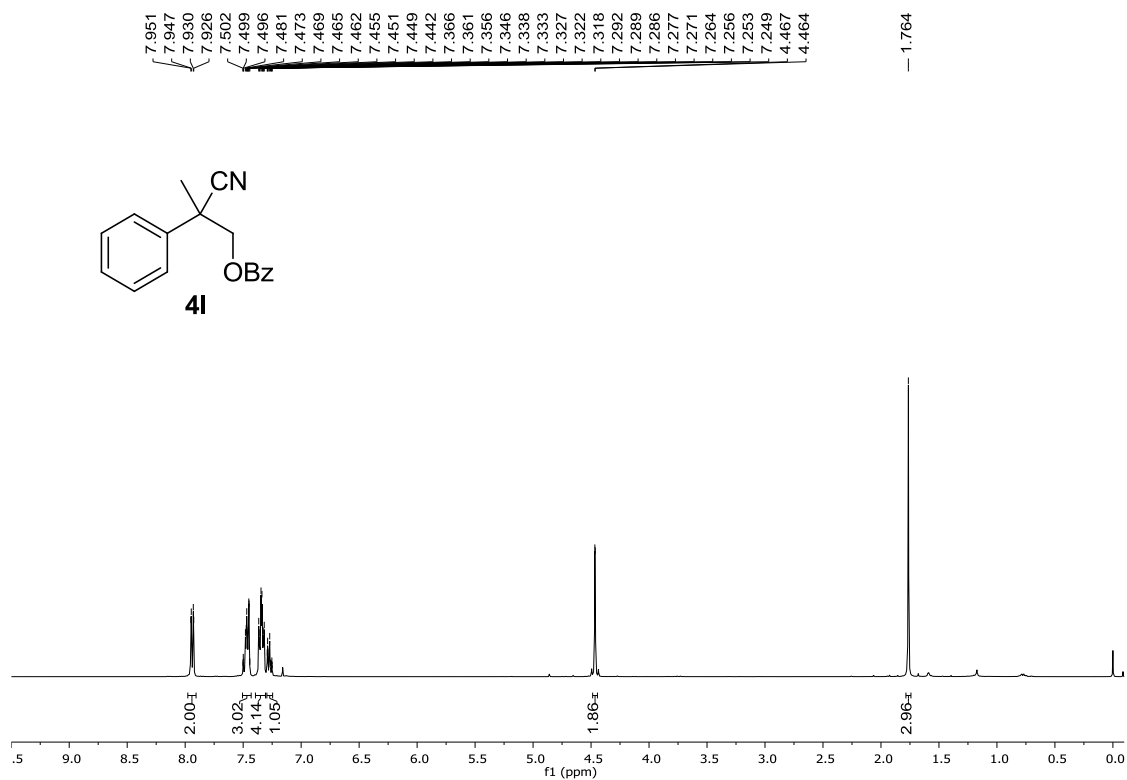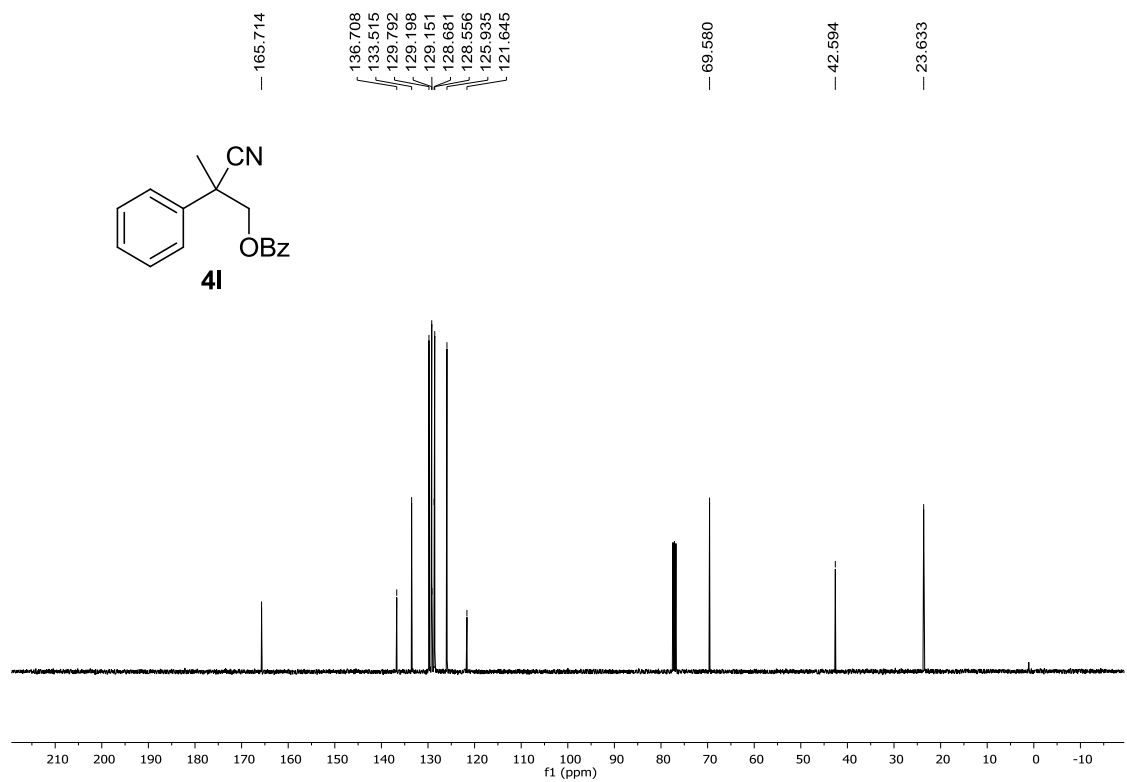

7.599  
7.580  
7.469  
7.449  
7.430  
7.403  
7.397  
7.392  
7.388  
7.382  
7.378  
7.376  
7.372  
7.368  
7.363  
7.361  
7.355  
7.349  
7.343  
7.338  
5.309  
5.288  
5.488  
5.485  
5.472  
5.469  
5.456  
5.453  
5.441

4.141  
4.129

1.514  
1.498

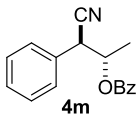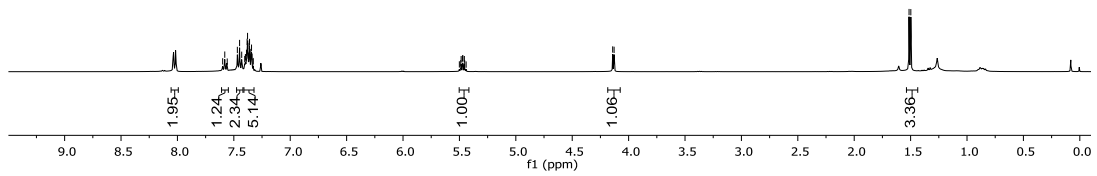

165.244  
133.387  
131.982  
129.726  
129.454  
129.100  
128.765  
128.502  
128.294  
118.080

71.362

43.665

18.355

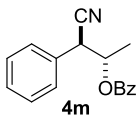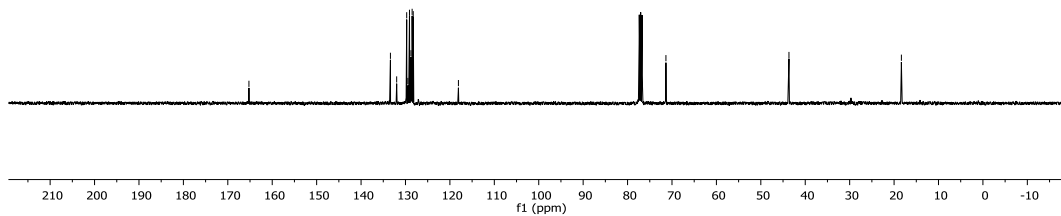

7.951  
7.933  
7.930  
7.510  
7.497  
7.492  
7.487  
7.477  
7.473  
7.470  
7.371  
7.366  
7.351  
7.351  
7.332  
7.264  
7.261  
7.254  
7.248  
7.243  
7.235  
7.231  
7.218  
7.211  
7.205  
7.196  
7.192  
7.188

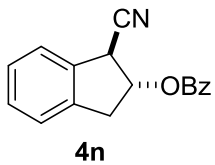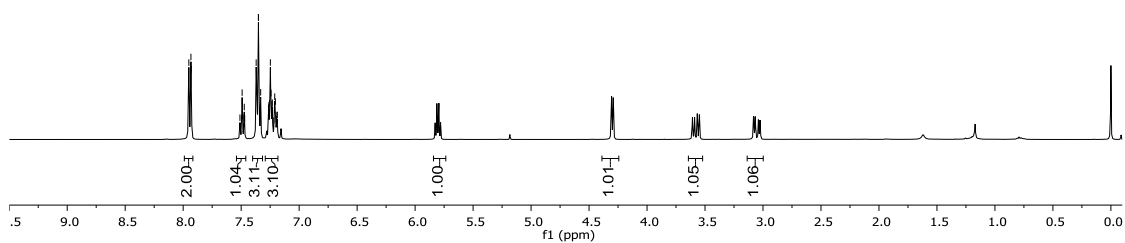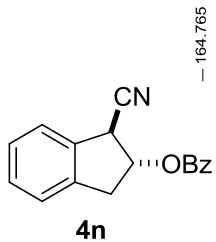

164.765

138.210  
133.277  
132.534  
128.739  
128.384  
128.079  
127.037  
124.255  
123.566  
117.565

76.819

40.236  
37.067

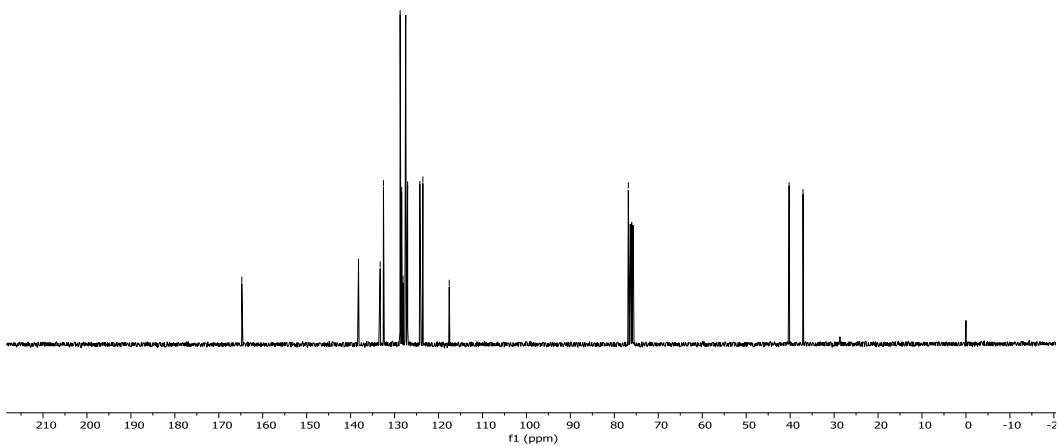

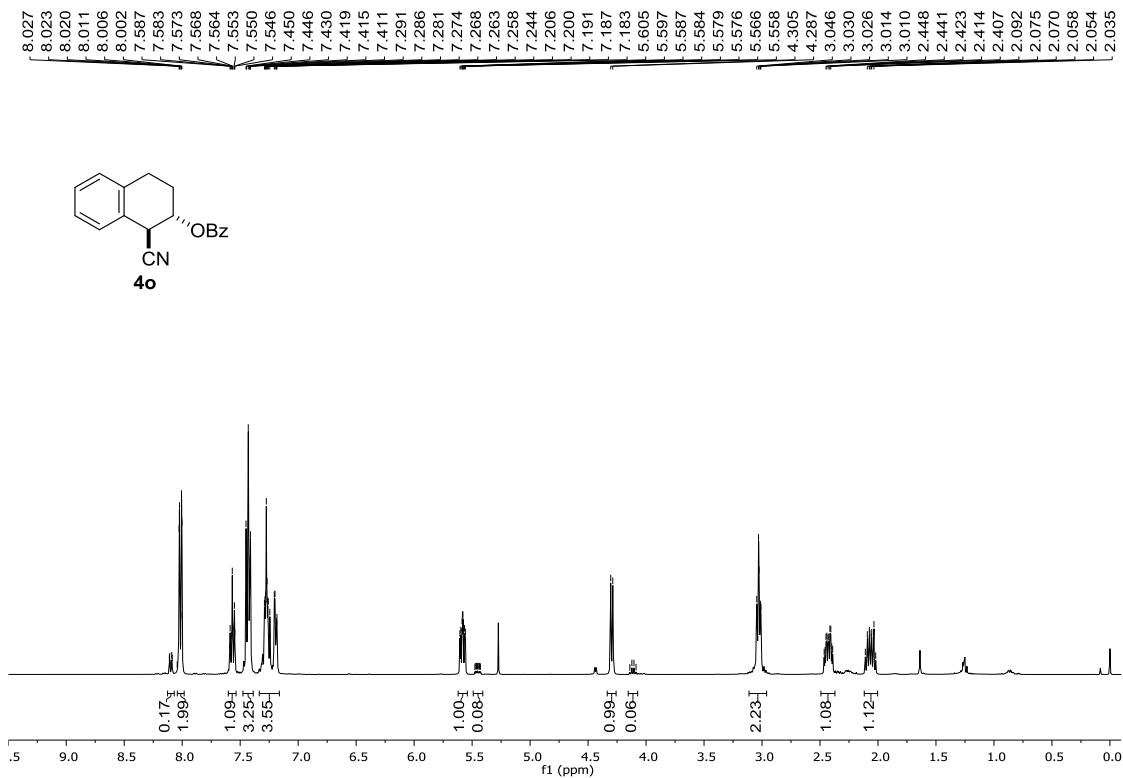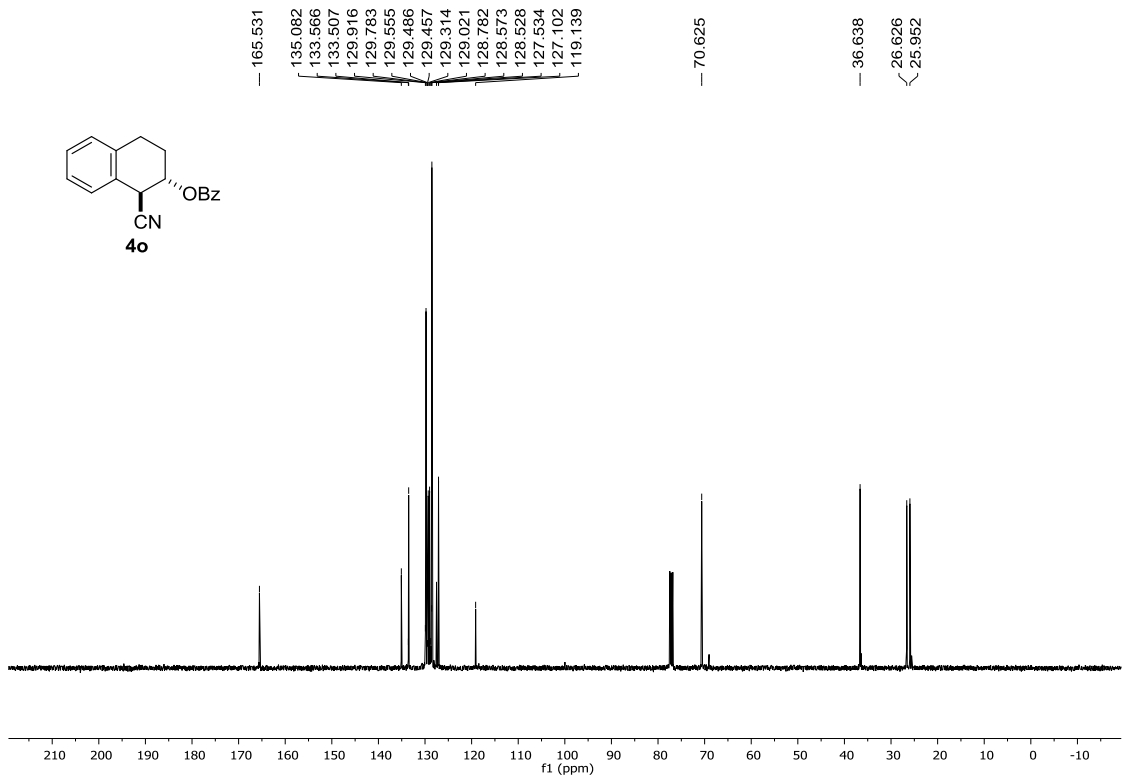

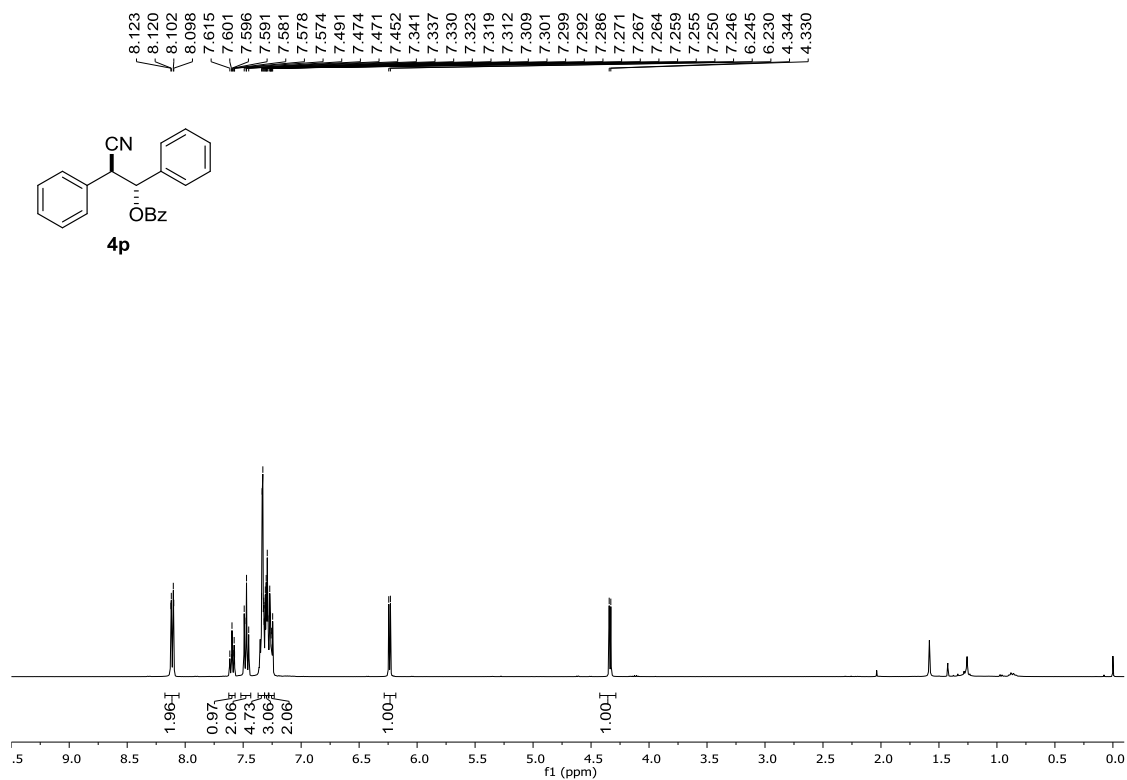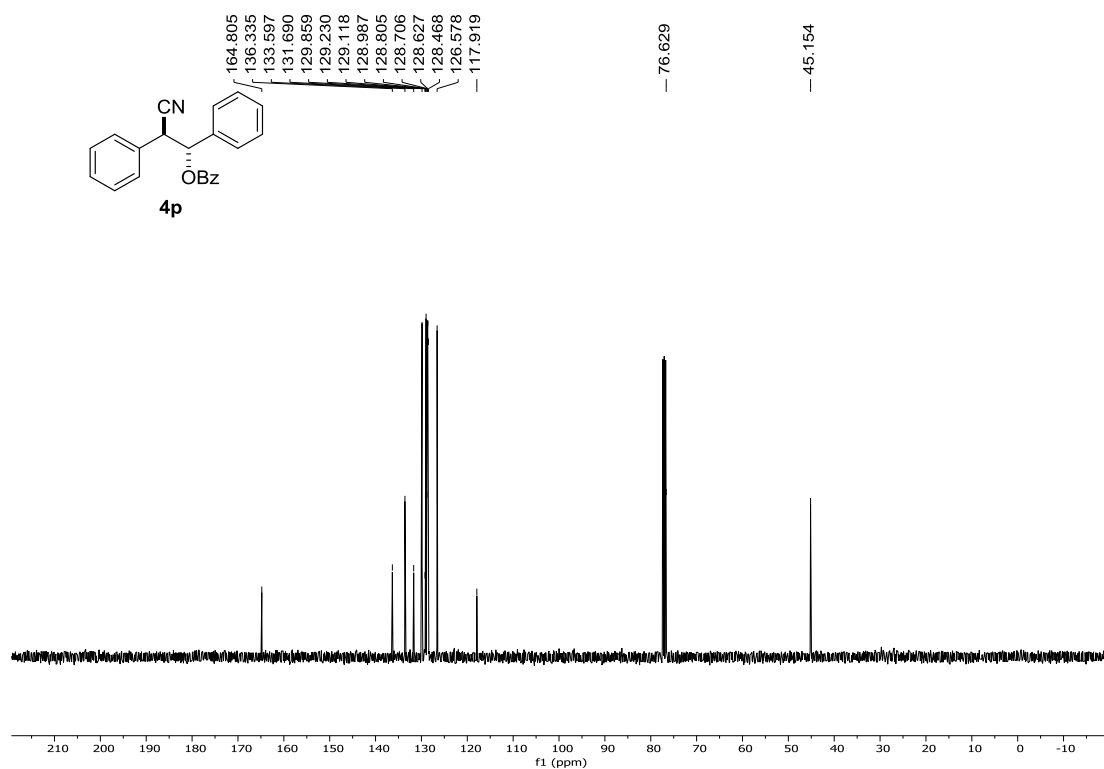

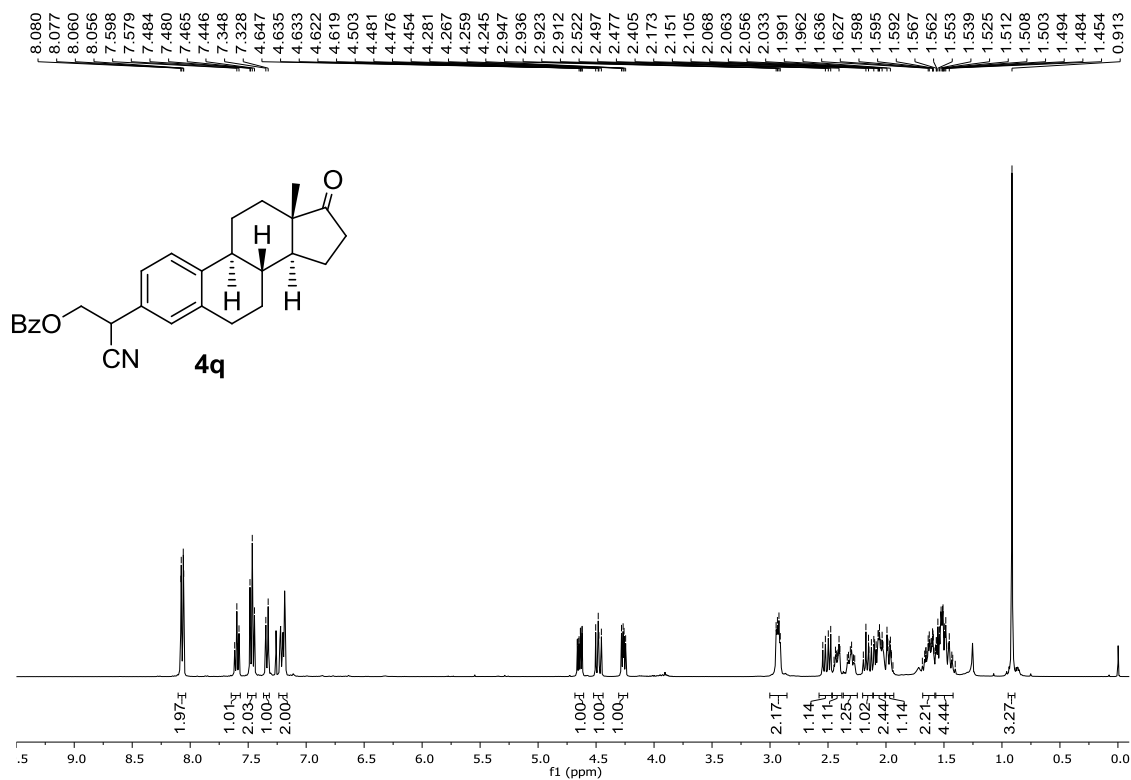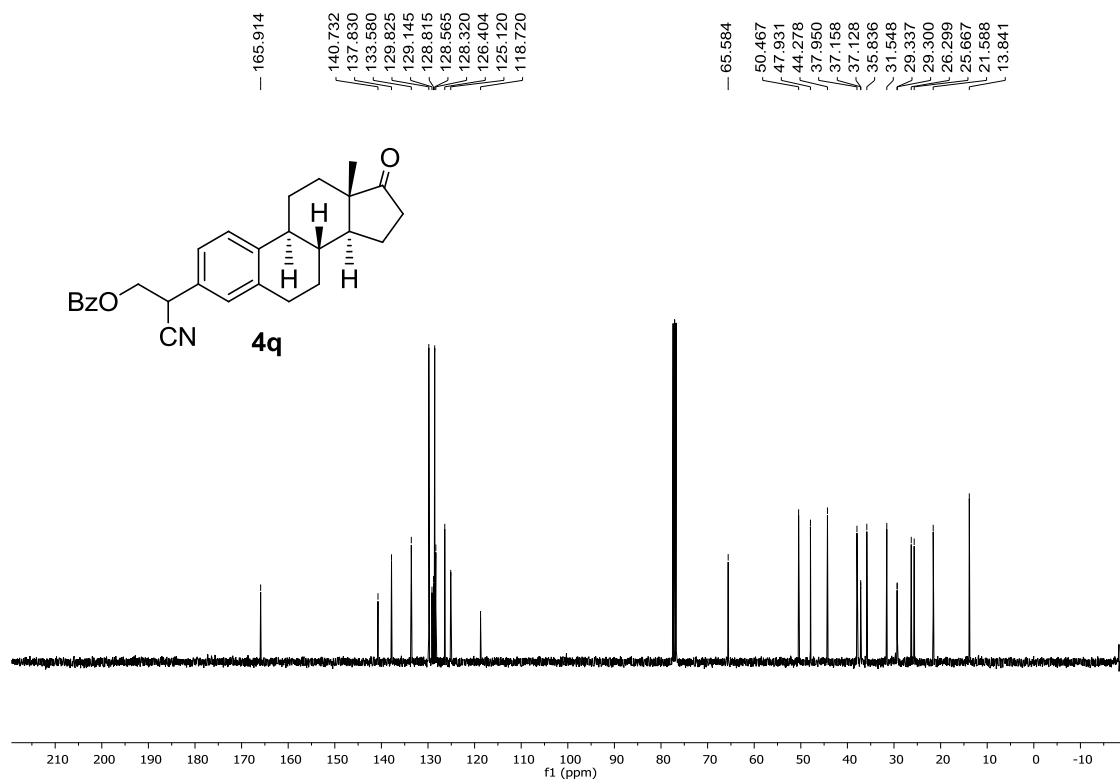



8.081  
8.078  
8.074  
8.060  
8.057  
7.612  
7.594  
7.579  
7.575  
7.572  
7.482  
7.478  
7.465  
7.462  
7.458  
7.443  
4.494  
4.481  
4.467  
4.453  
4.406  
4.387  
4.379  
4.360  
3.038  
3.035  
1.745  
1.734  
1.732  
1.723  
1.713  
1.709  
1.699  
1.685  
1.666  
1.375  
1.369  
1.366  
1.359  
1.351  
1.347  
1.344  
1.337  
1.329  
1.324  
1.320  
1.311  
1.307  
1.302  
1.298  
1.294  
1.291  
1.285  
0.910  
0.904  
0.899  
0.893  
0.881  
0.876

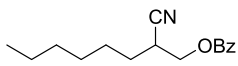

6a

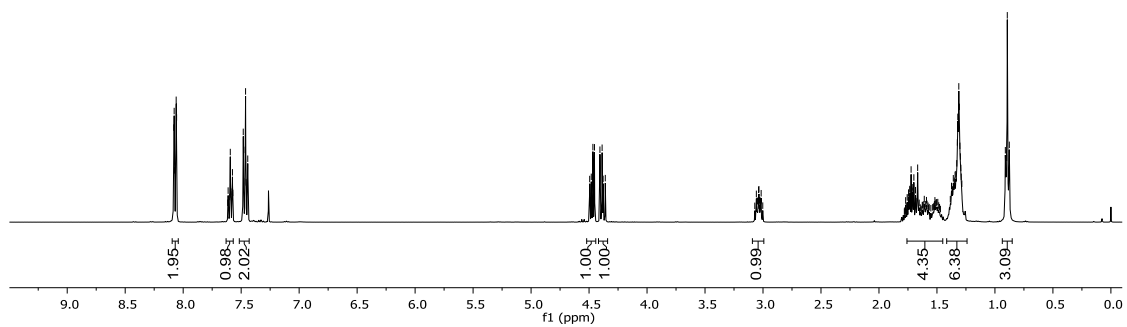

165.967

133.511  
129.785  
129.199  
128.539  
119.793

63.597

31.753  
31.449  
28.939  
28.683  
26.869  
22.494  
14.006

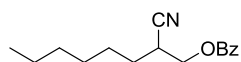

6a

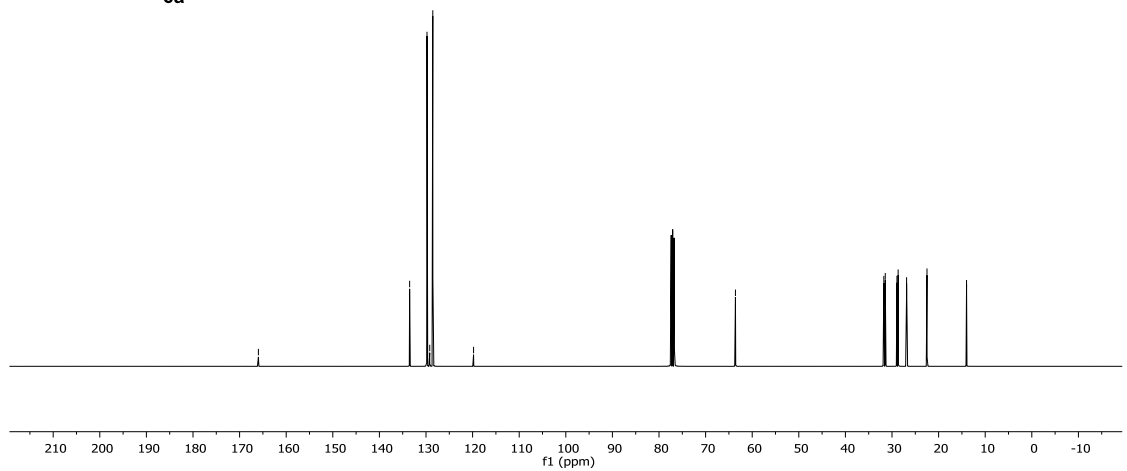

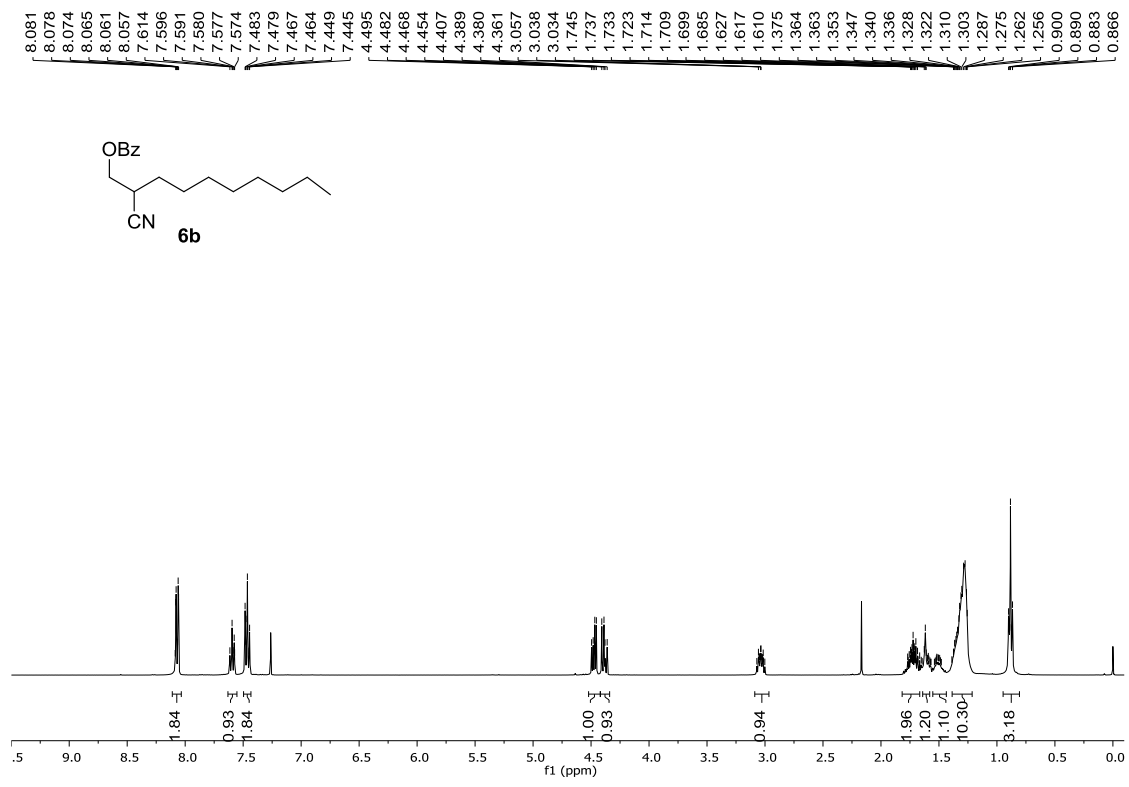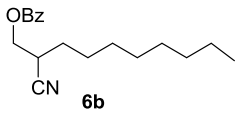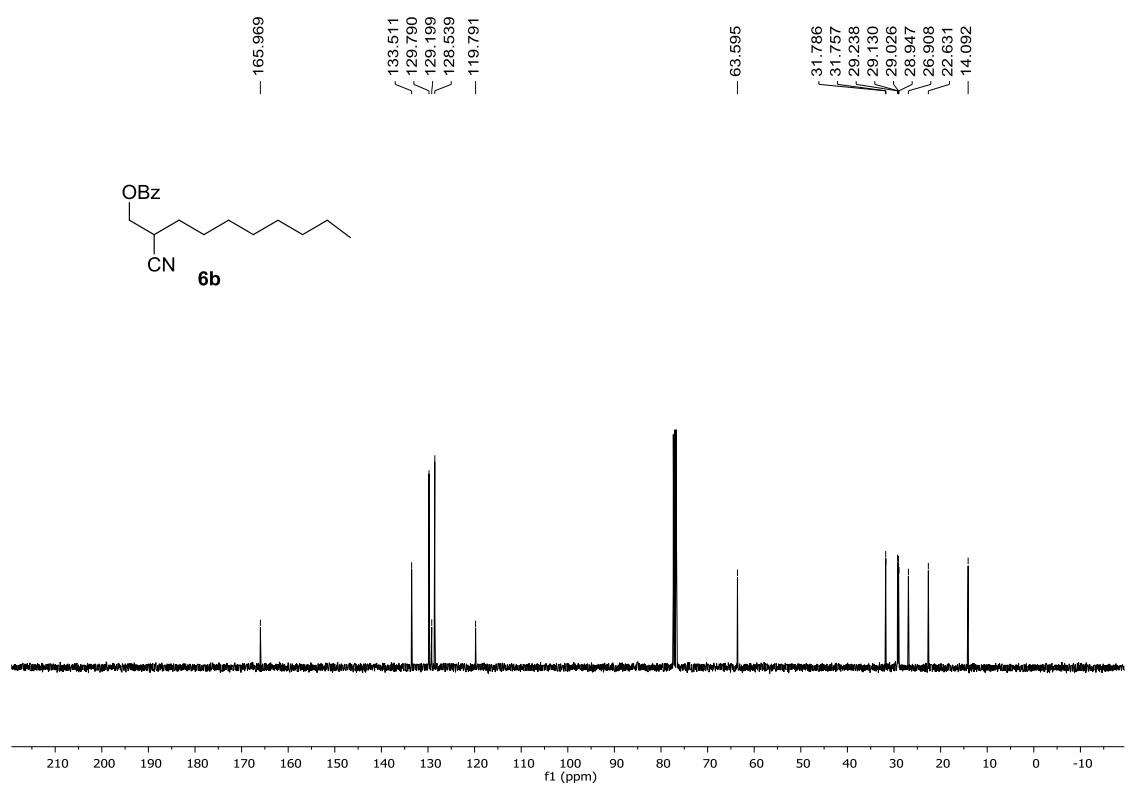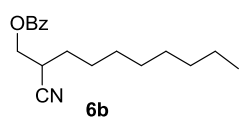

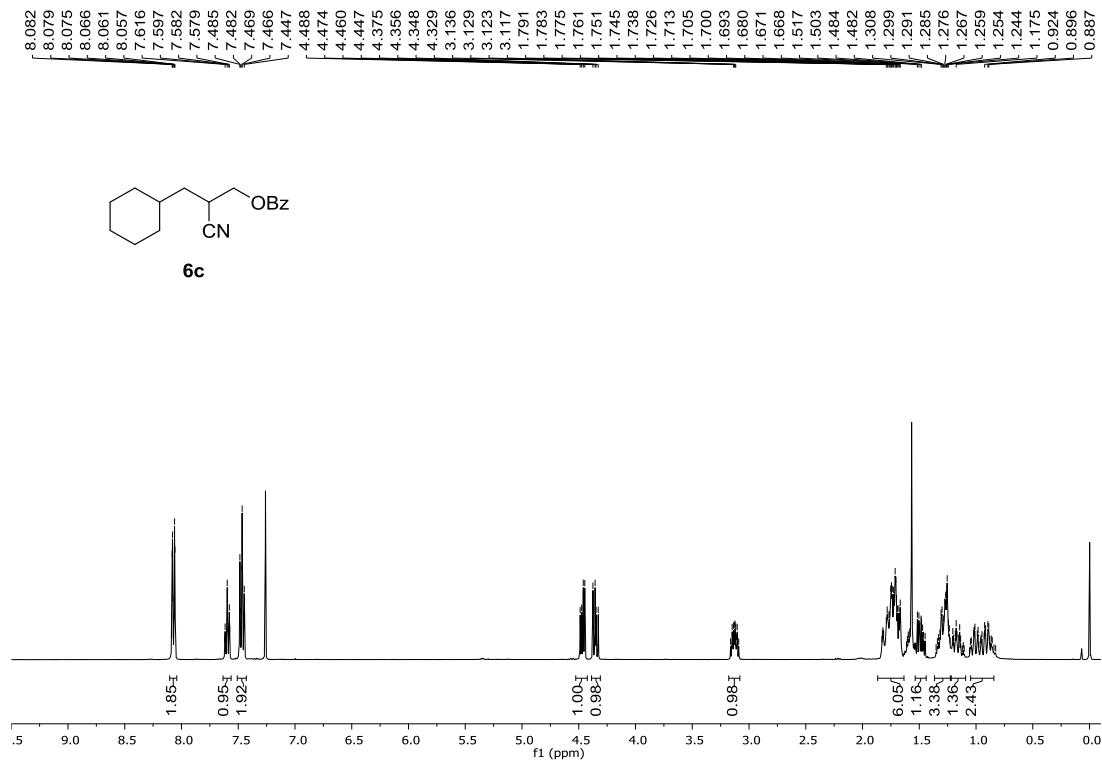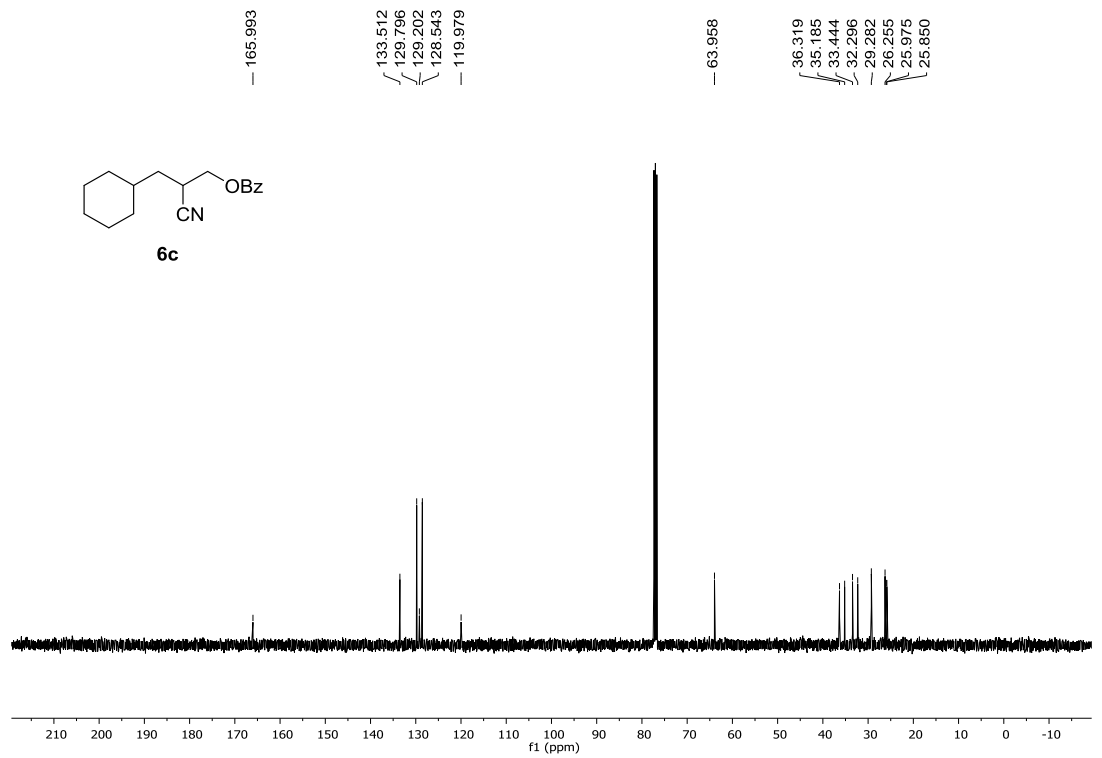

8.064  
8.060  
8.057  
8.043  
8.039  
7.605  
7.587  
7.582  
7.572  
7.568  
7.565  
7.472  
7.468  
7.456  
7.453  
7.434  
7.336  
7.323  
7.319  
7.315  
7.304  
7.300  
7.257  
7.254  
7.250  
7.247  
7.235  
7.230  
7.227  
7.214  
7.209  
7.209  
4.481  
4.467  
4.453  
4.440  
4.421  
4.403  
4.393  
4.375  
4.375  
3.006  
3.002  
2.994  
2.989  
2.982  
2.977  
2.968  
2.964  
2.955  
2.950  
2.947  
2.832  
2.812  
2.797  
2.113  
2.092  
2.089  
2.018  
2.004  
1.984

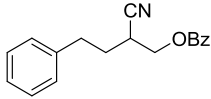

6d

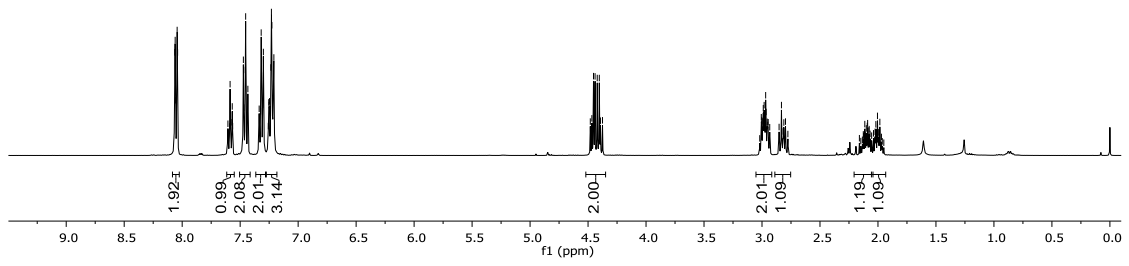

165.905

139.482  
133.565  
129.807  
129.123  
128.812  
128.567  
128.448  
126.704  
119.484

63.430

32.890  
31.064  
30.653

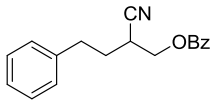

6d

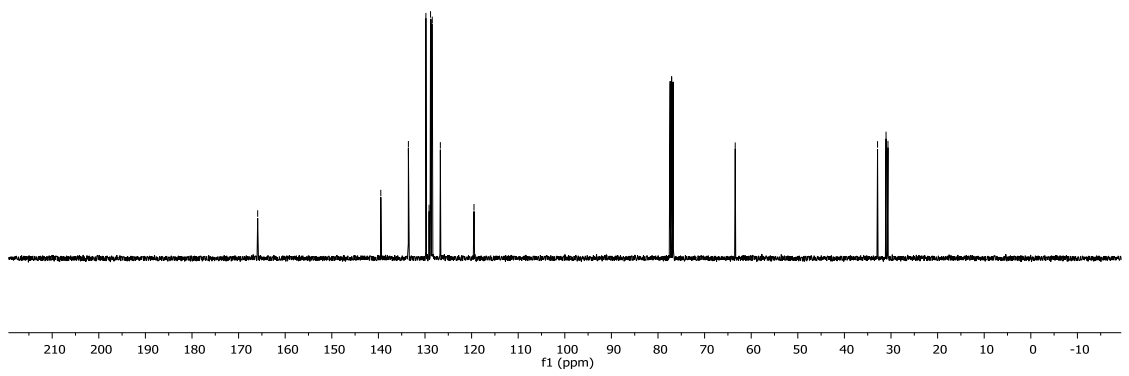

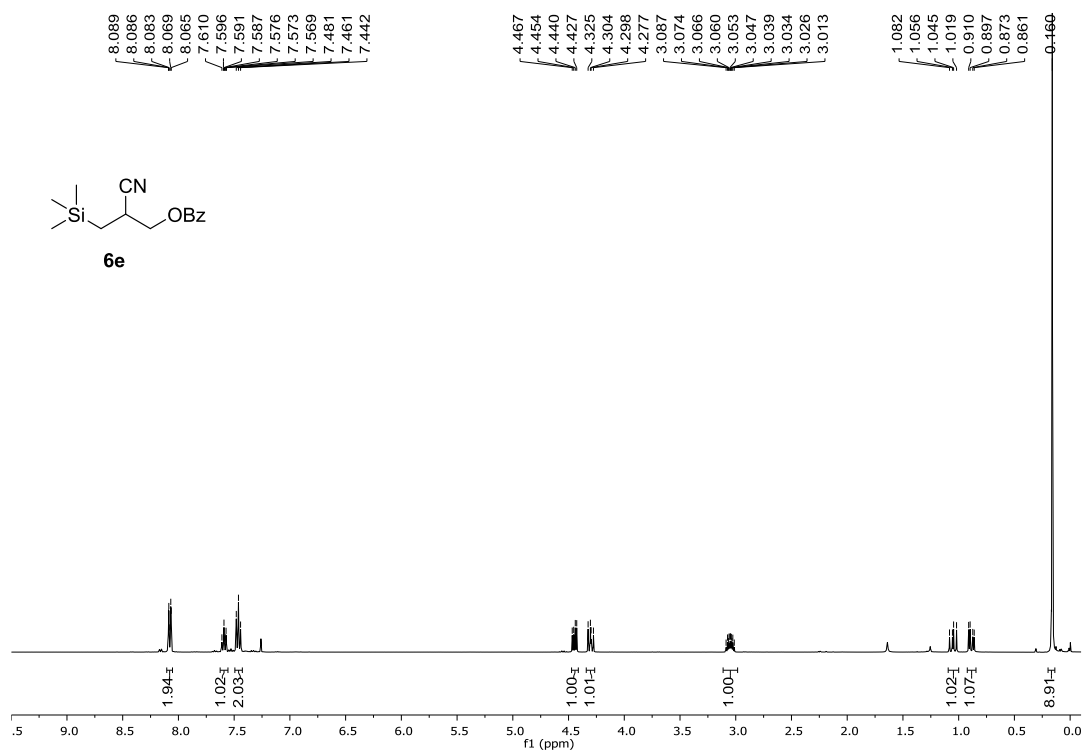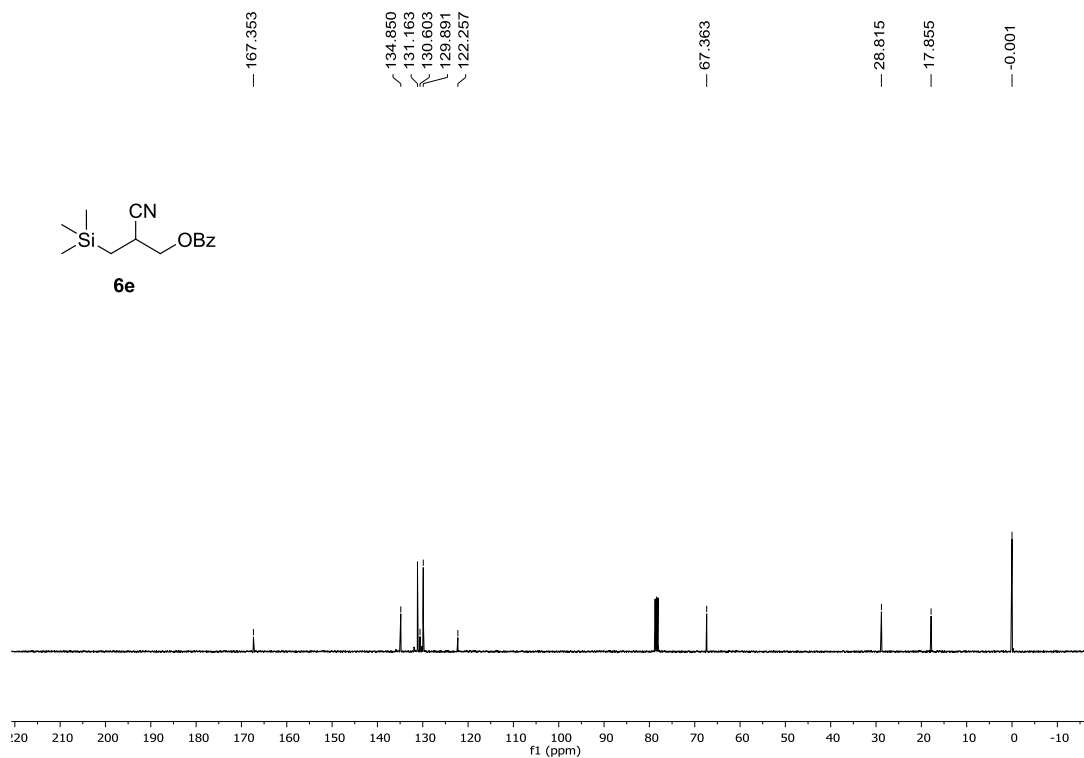

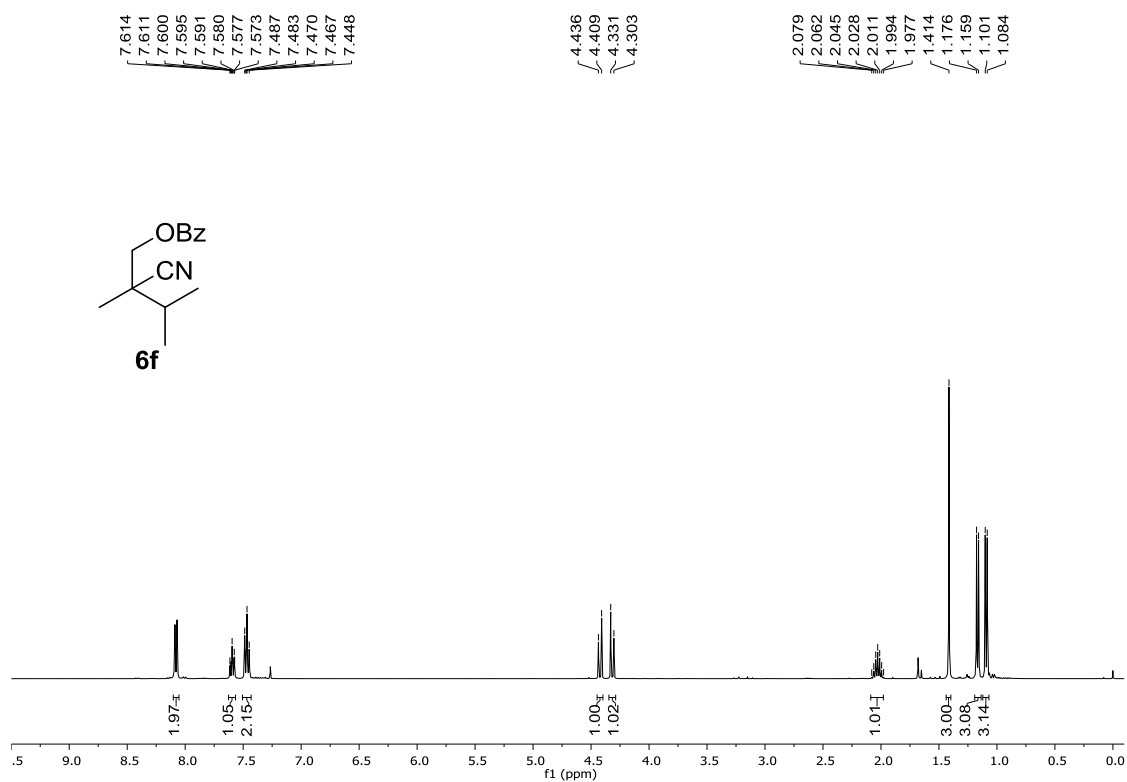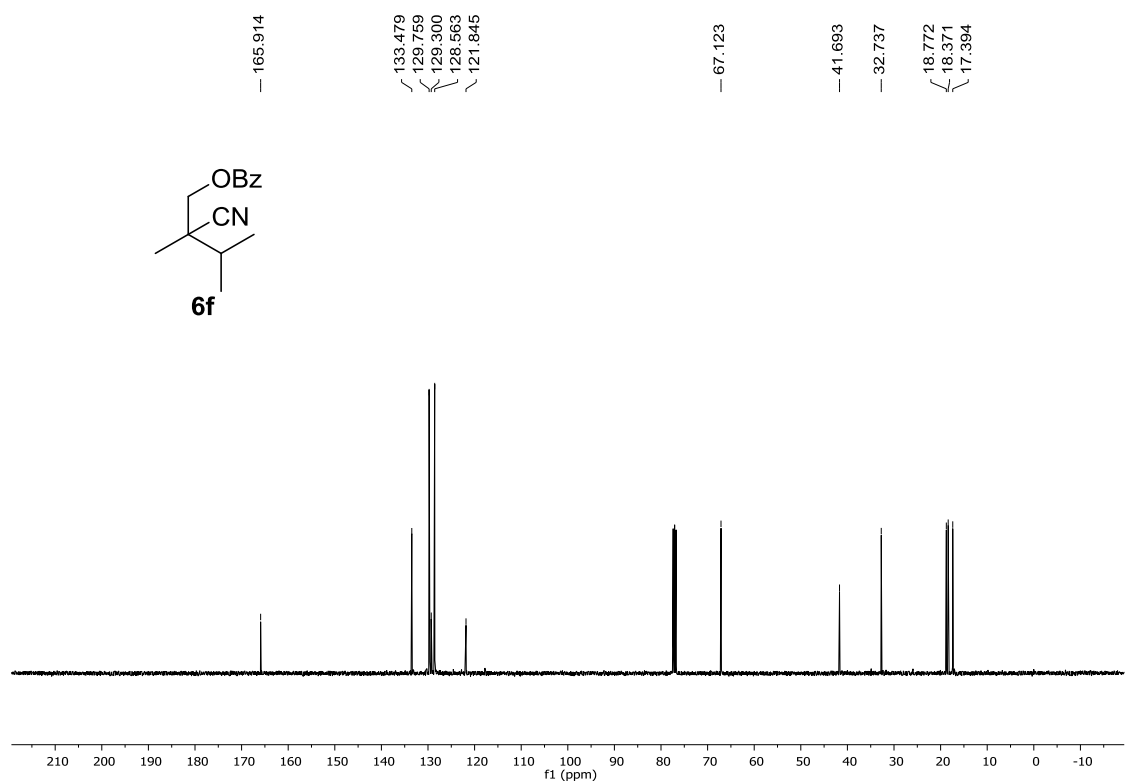

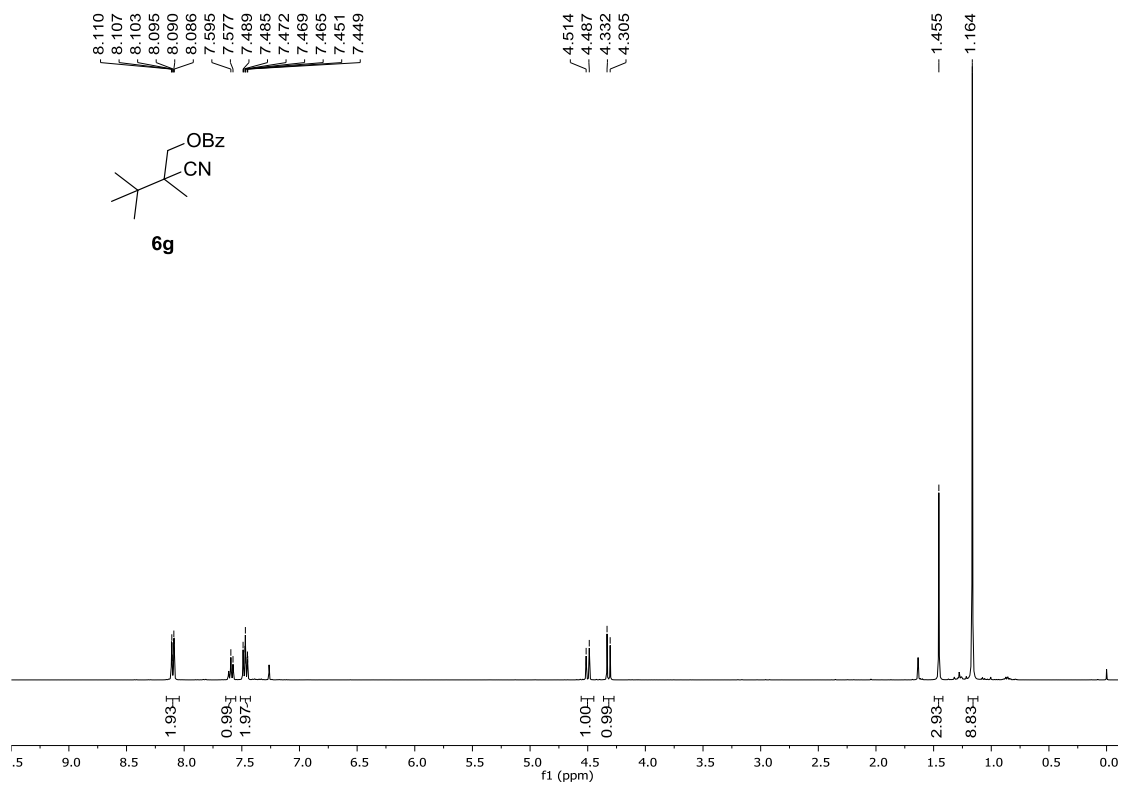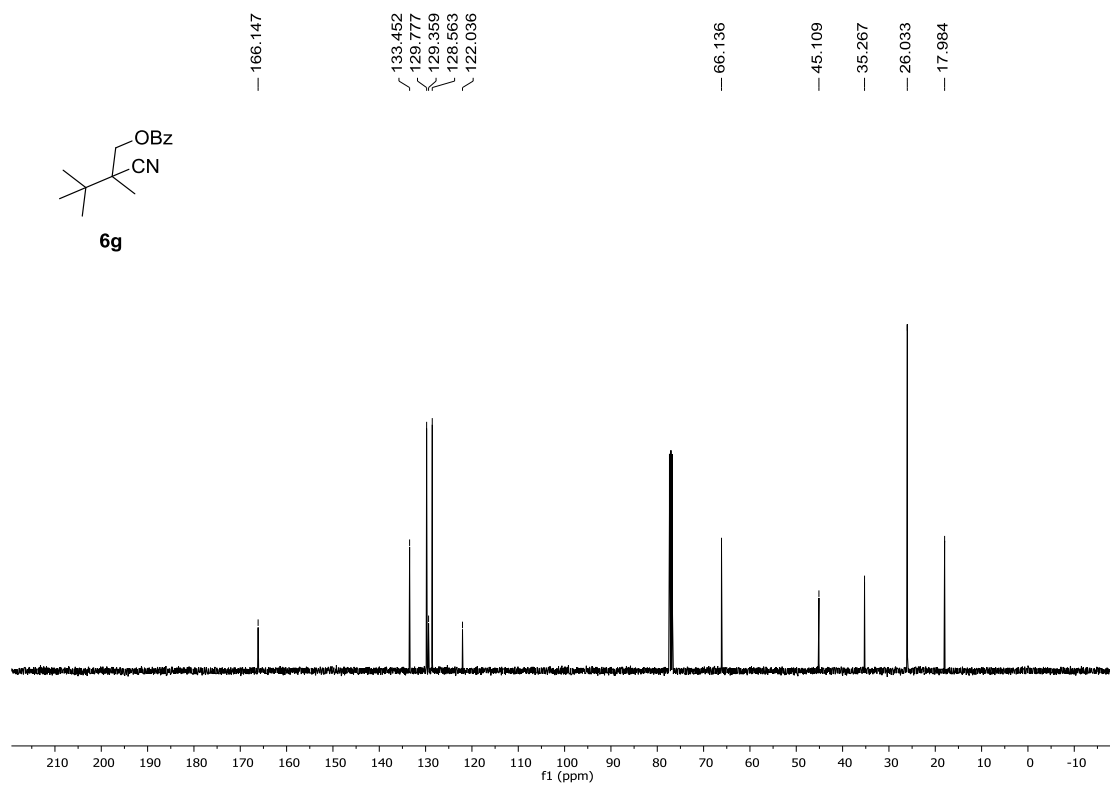

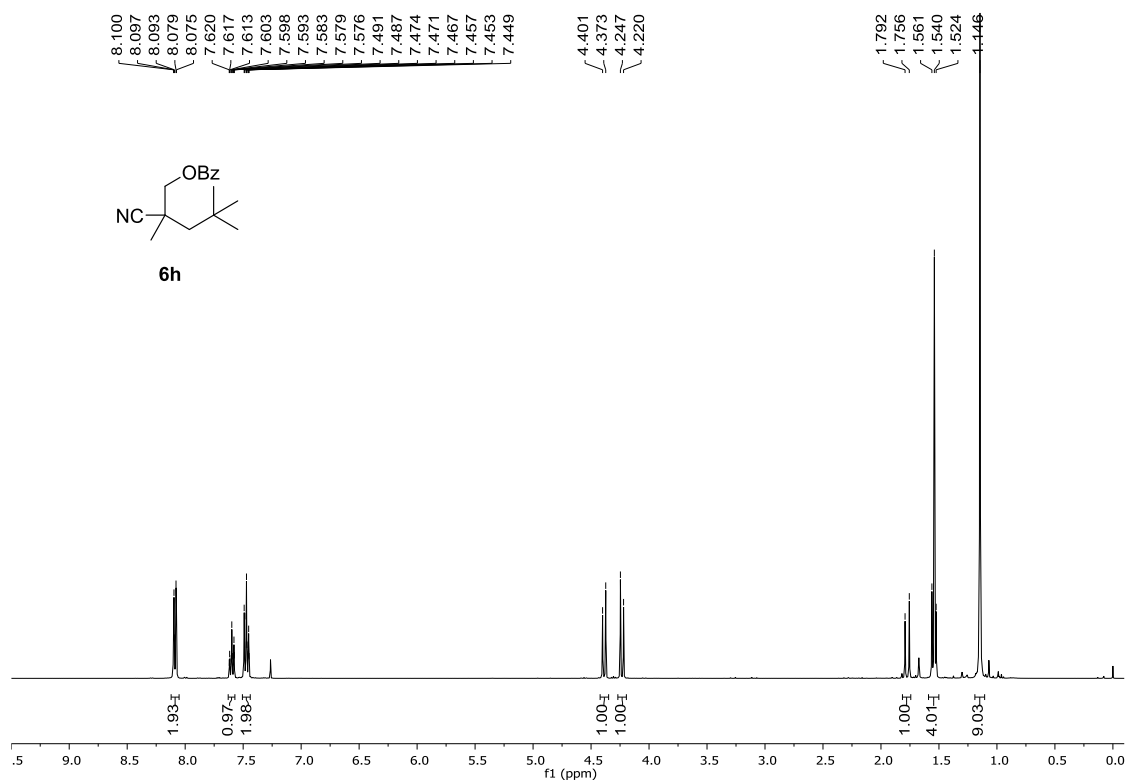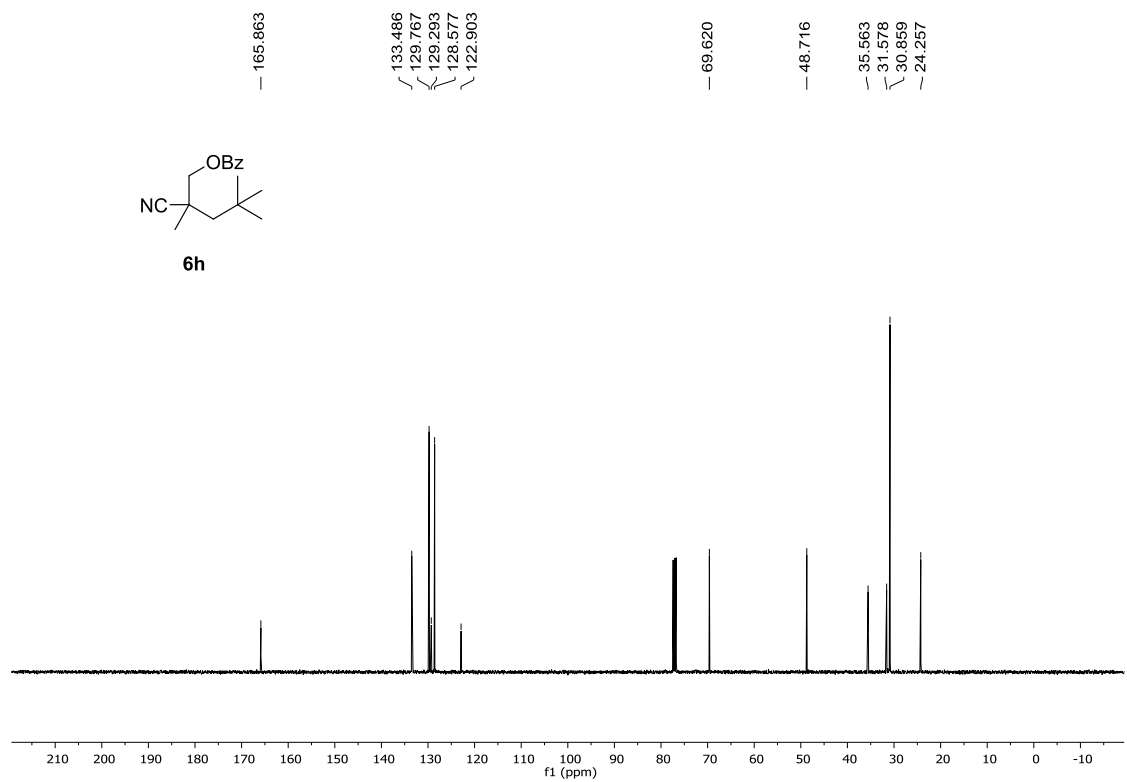



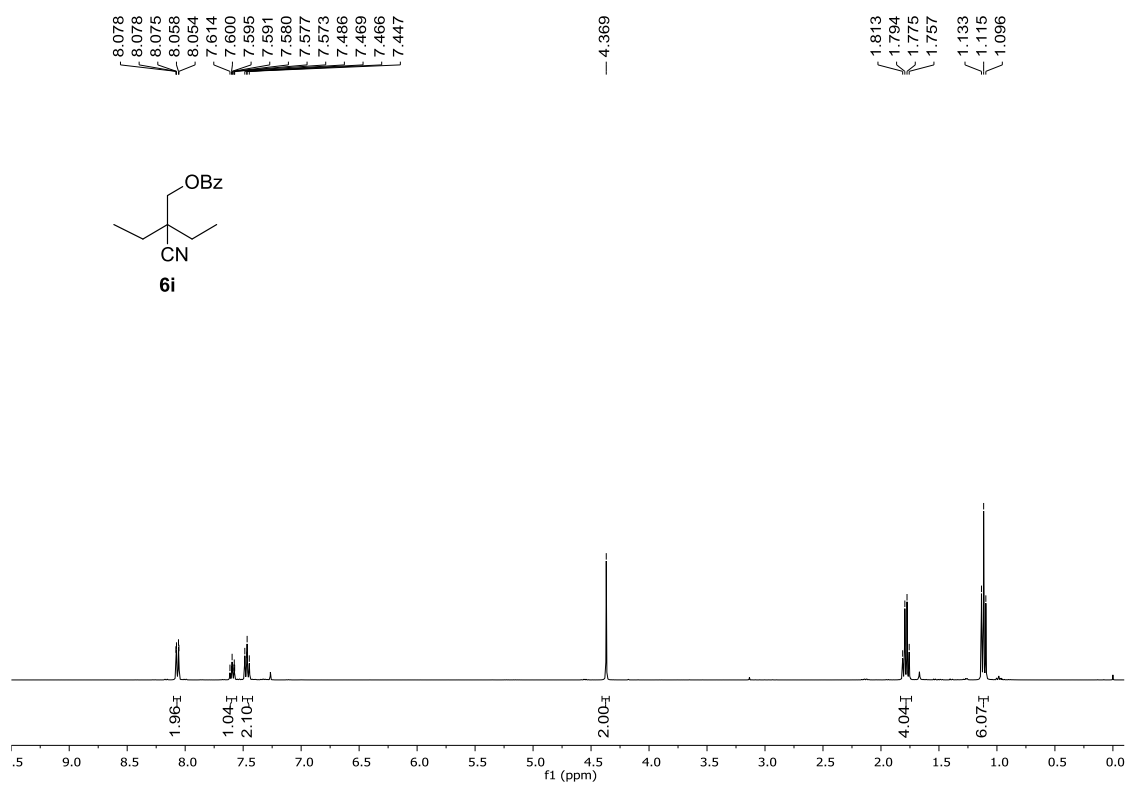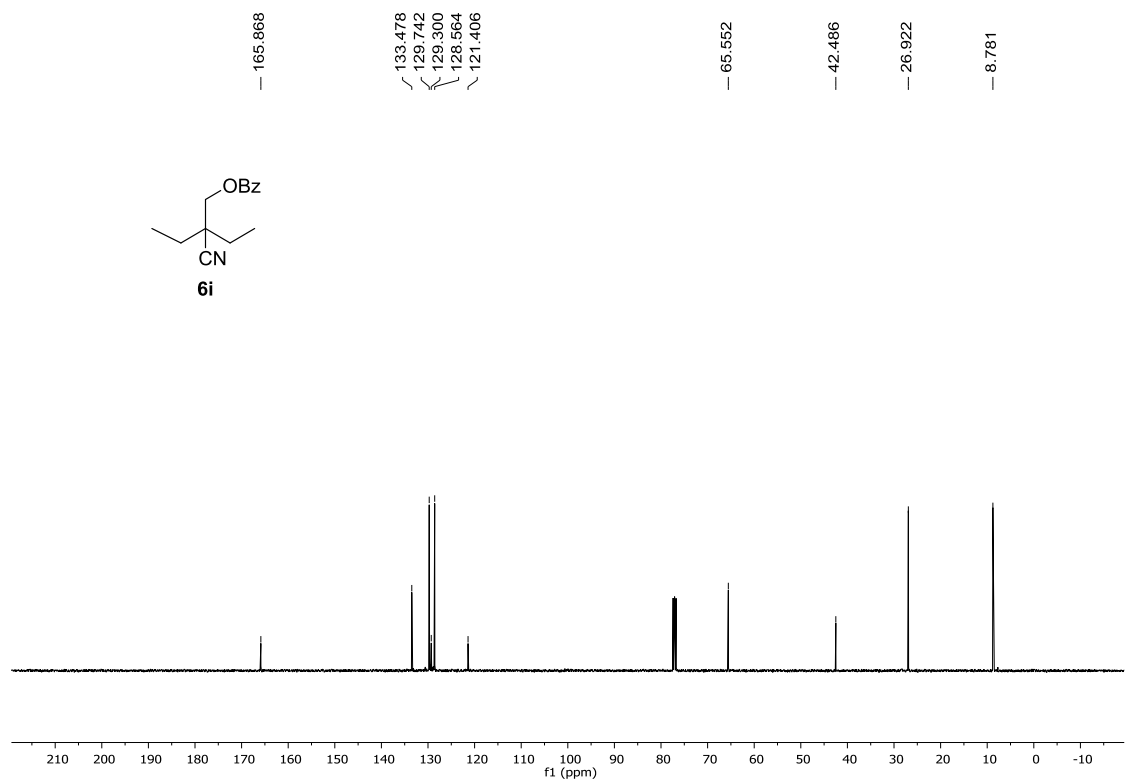

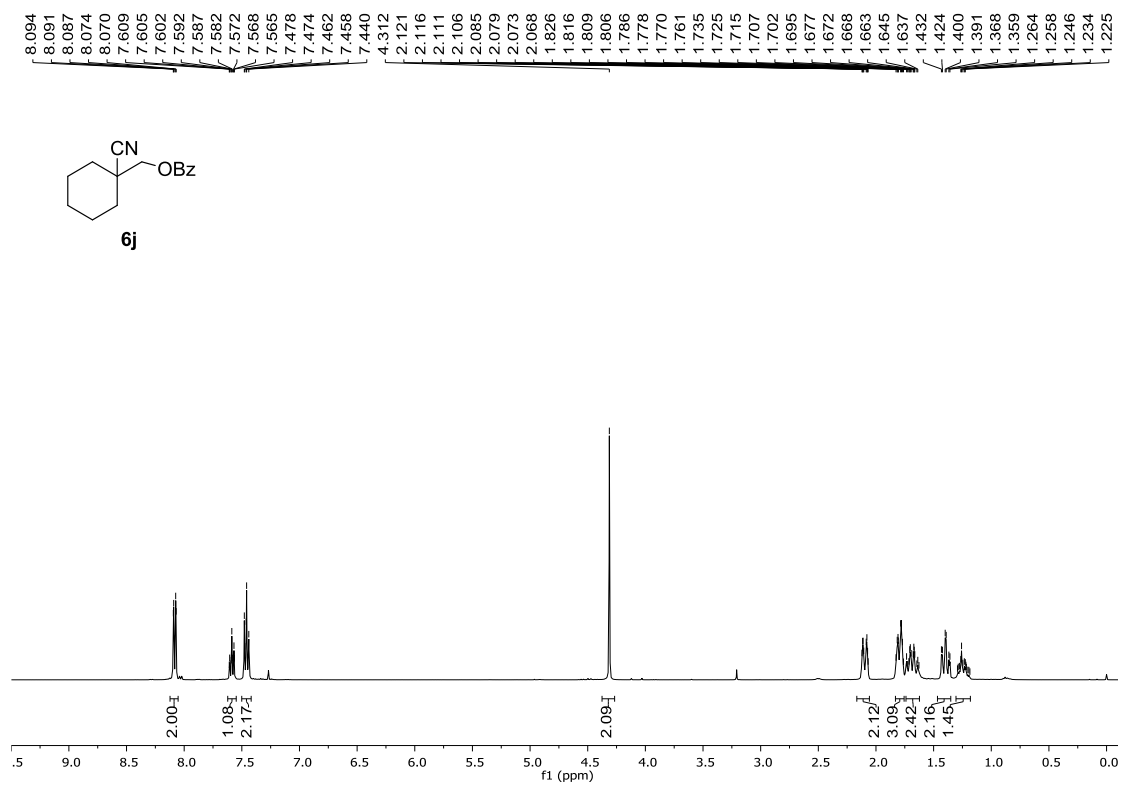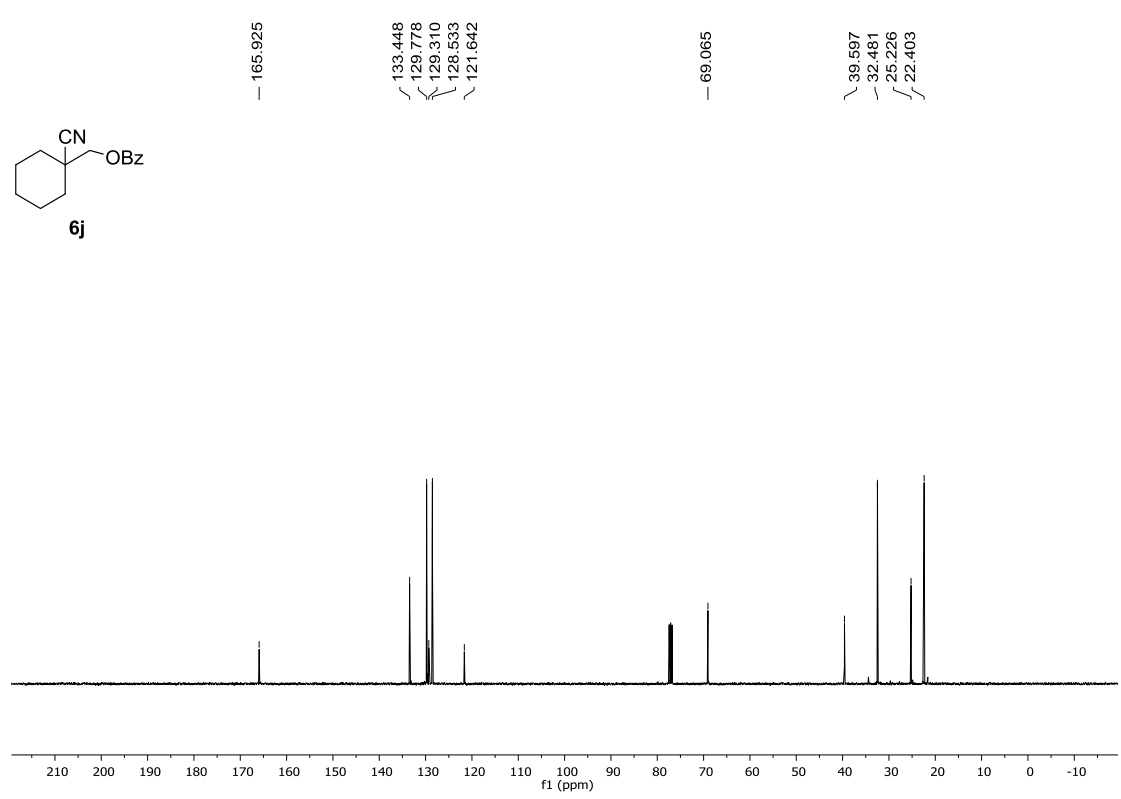

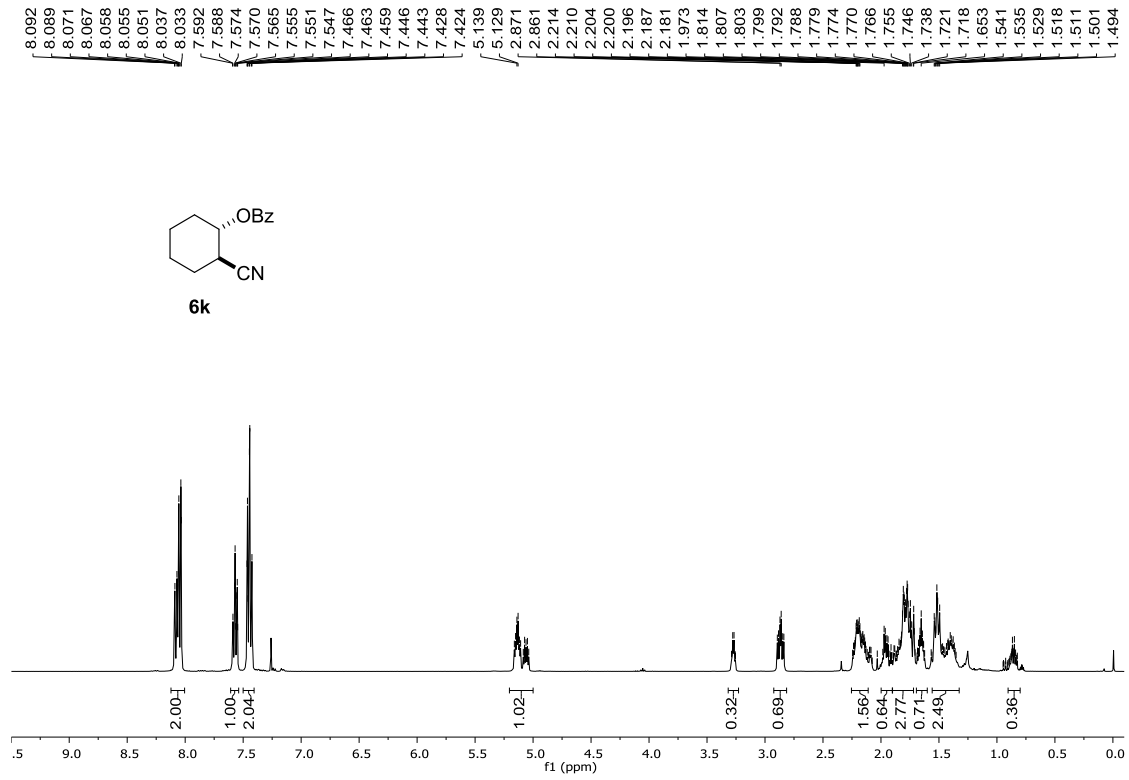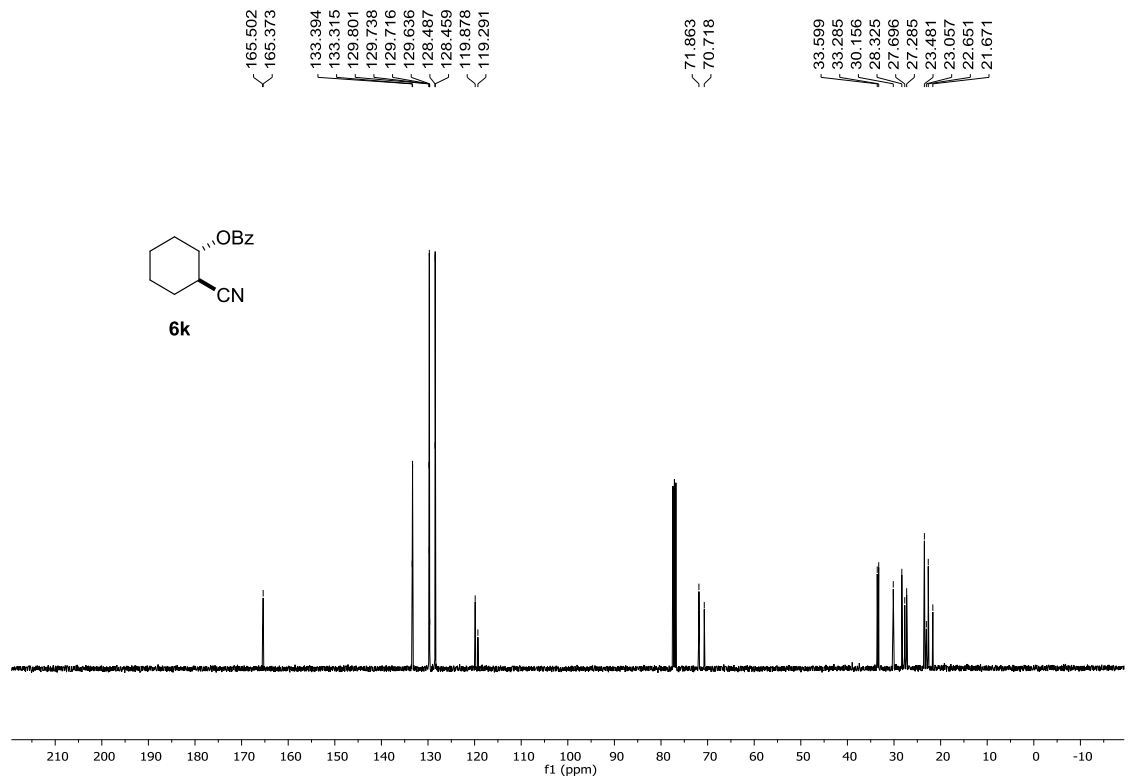

8.086  
8.083  
8.080  
8.066  
8.062  
7.619  
7.615  
7.612  
7.601  
7.597  
7.592  
7.581  
7.578  
7.575  
7.486  
7.482  
7.469  
7.466  
7.452  
7.447

4.458  
4.431  
4.348  
4.321  
3.984  
3.972  
3.966  
3.956  
3.950  
3.940  
3.934  
3.922  
2.092  
2.076  
2.060  
2.056  
2.040  
2.024  
1.953  
1.917  
1.901  
1.897  
1.881  
1.865  
1.522

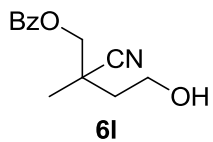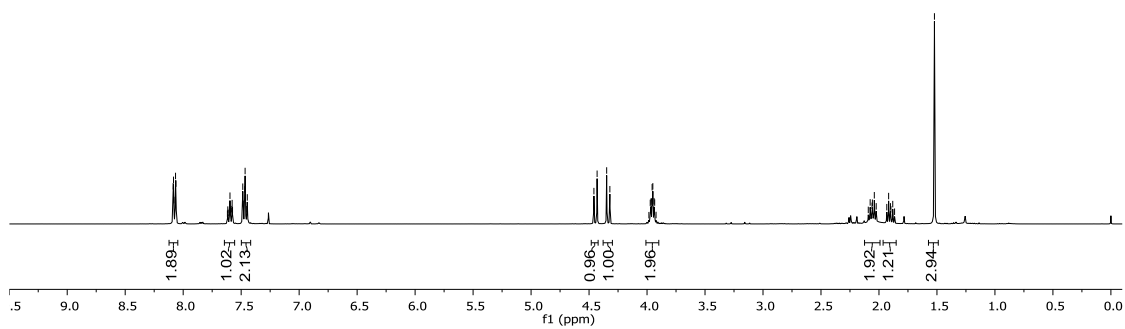

165.906

133.576  
129.777  
129.165  
128.601  
122.066

68.481

56.925

38.427  
36.098

22.173

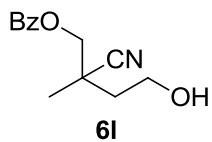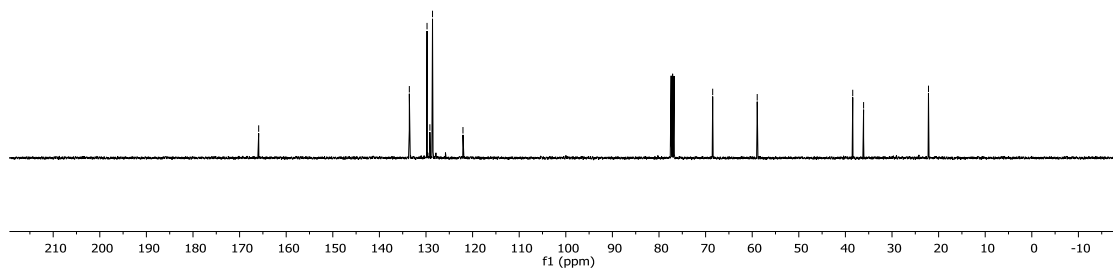

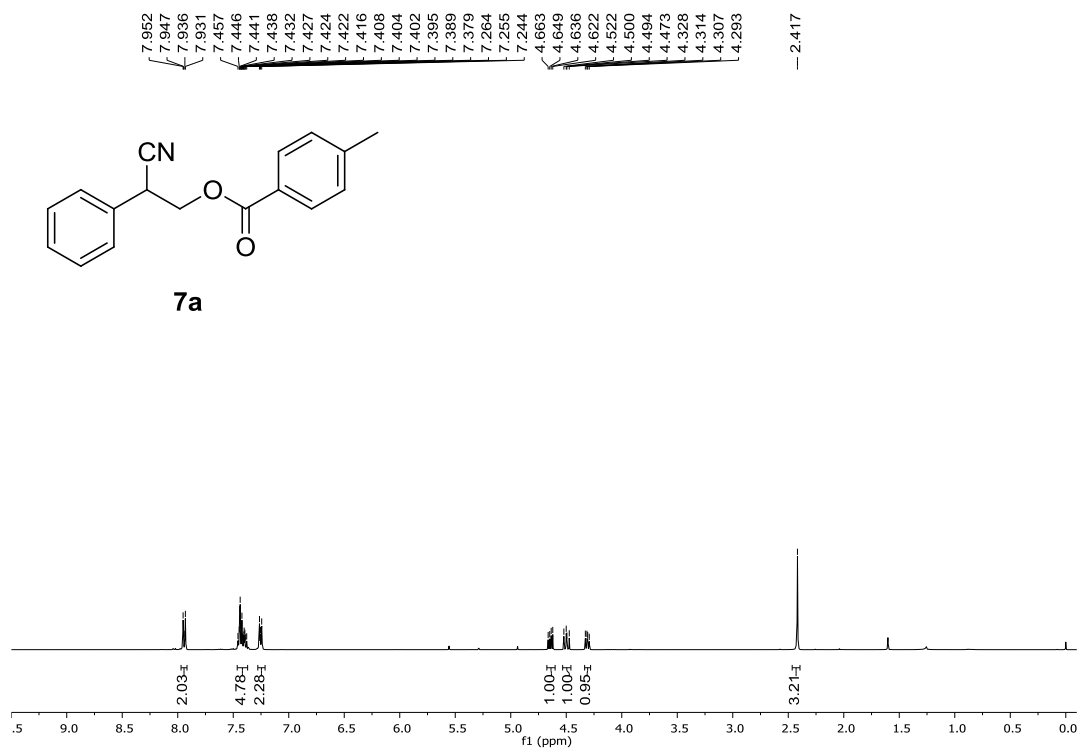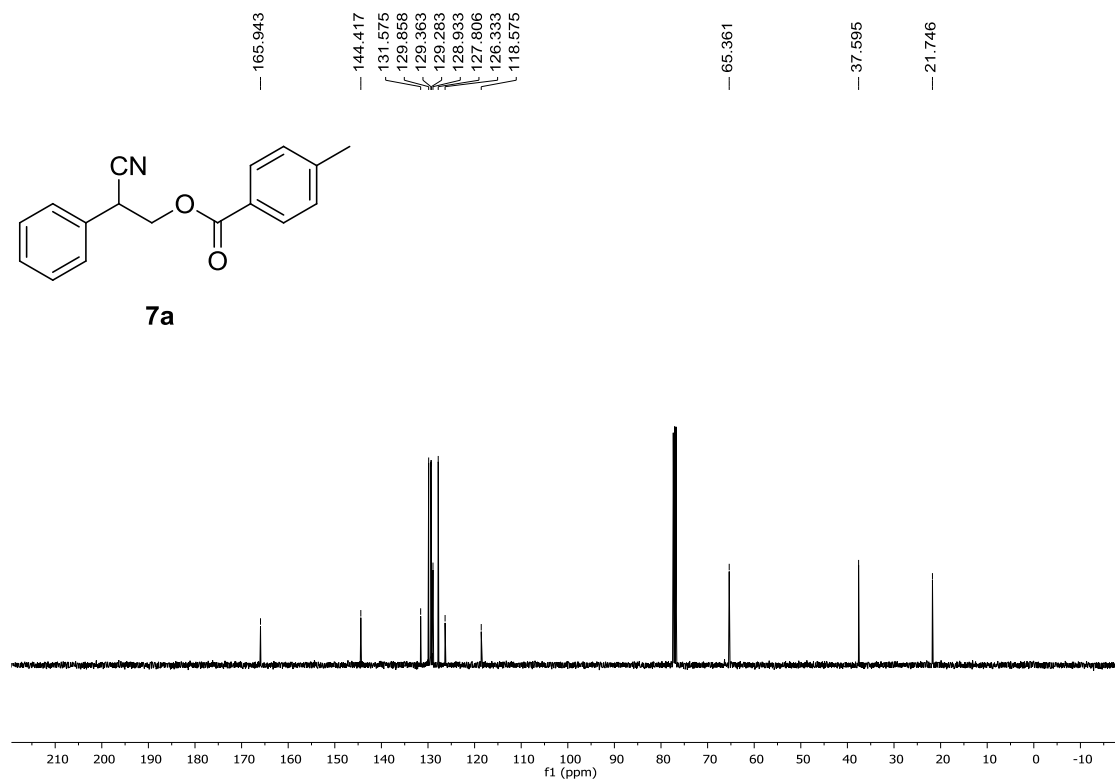

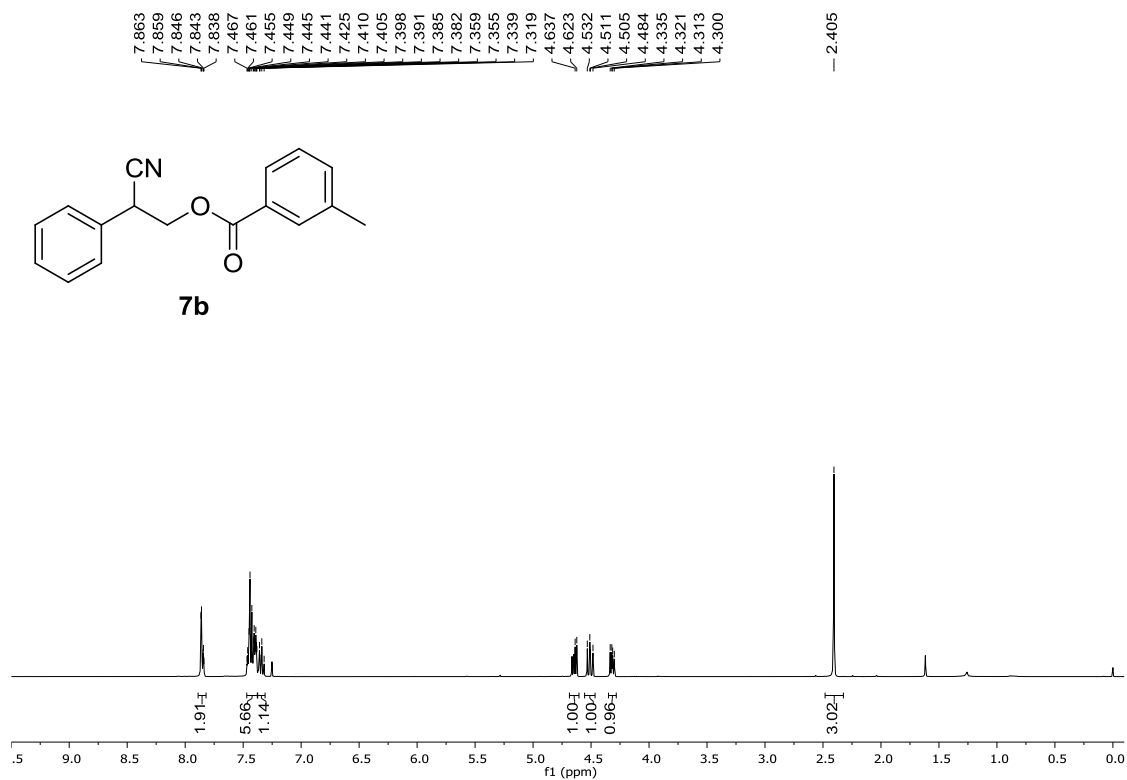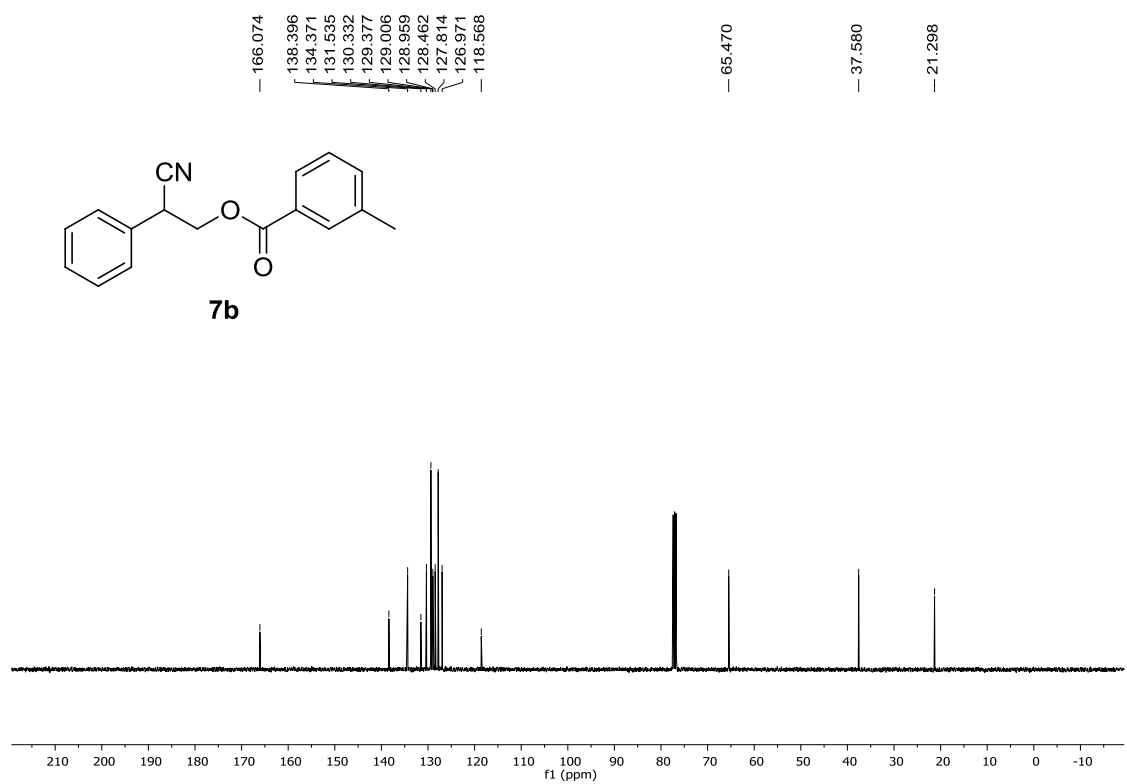

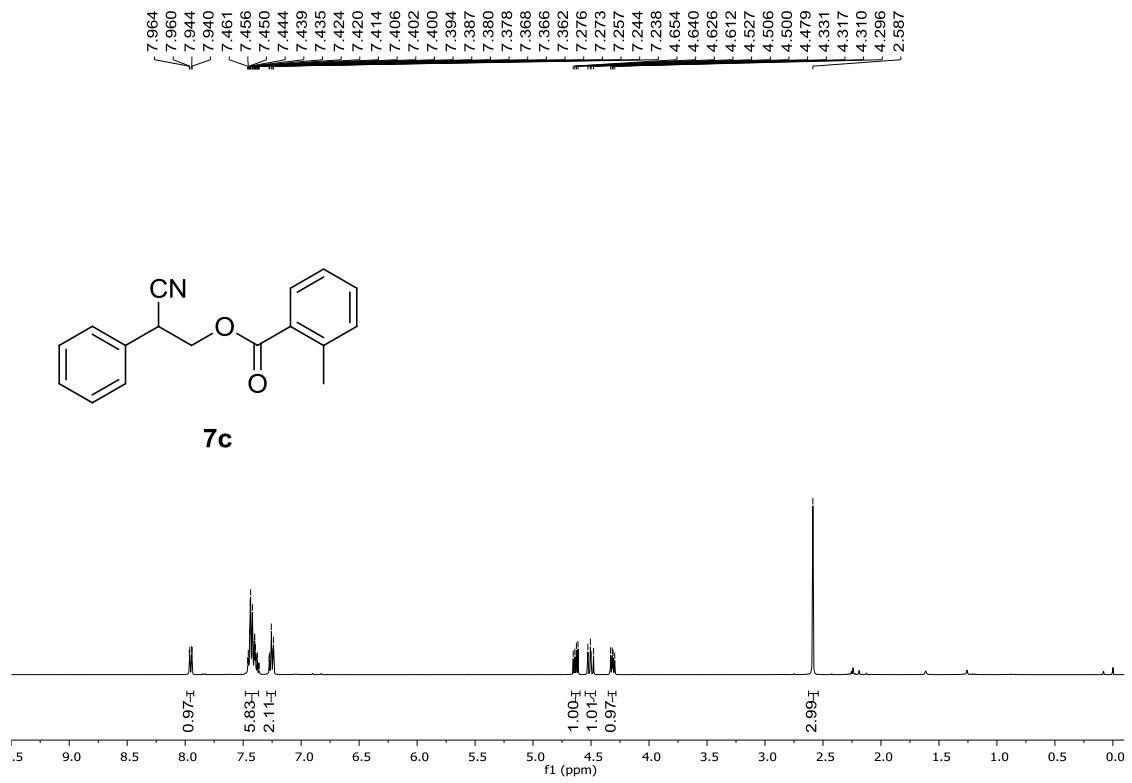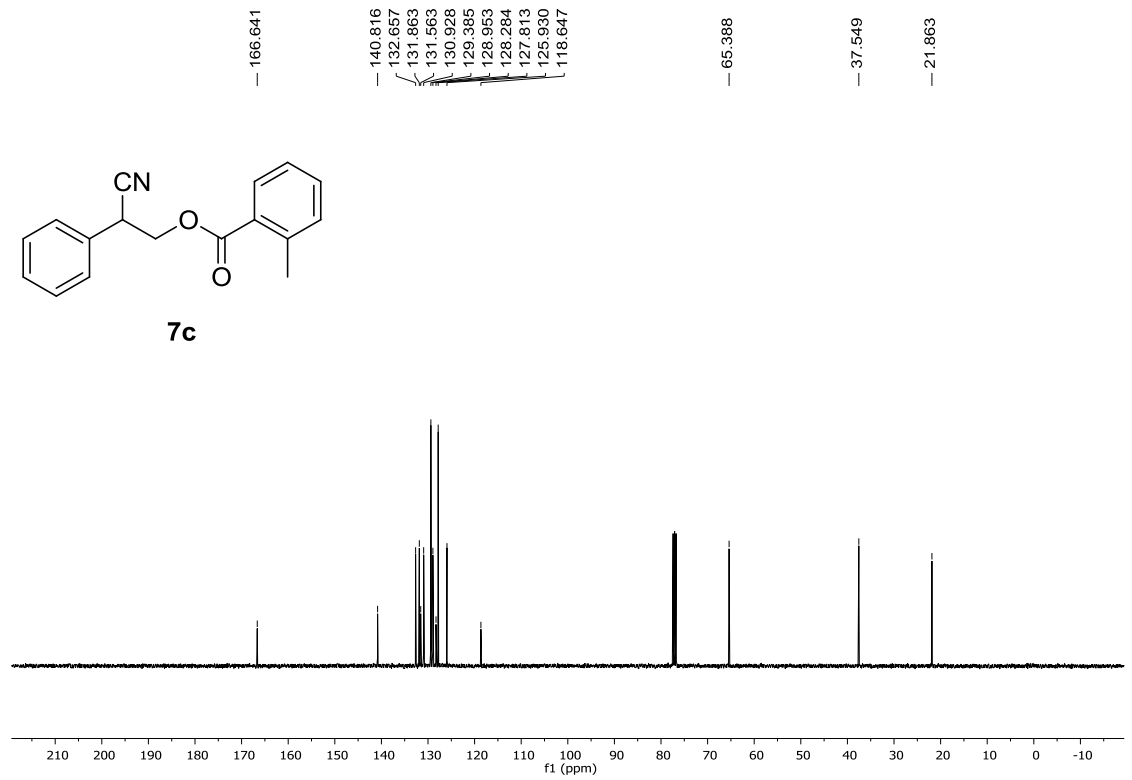

7.674  
7.670  
7.477  
7.471  
7.465  
7.459  
7.455  
7.451  
7.446  
7.441  
7.438  
7.435  
7.430  
7.422  
7.418  
7.416  
7.409  
7.402  
7.395  
7.392  
7.227  
4.658  
4.644  
4.631  
4.617  
4.550  
4.544  
4.544  
4.532  
4.522  
4.510  
4.504  
4.493  
4.483  
4.341  
4.327  
4.319  
4.305

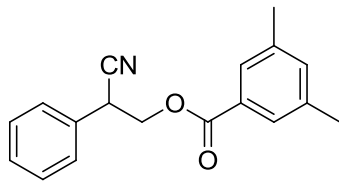

7d

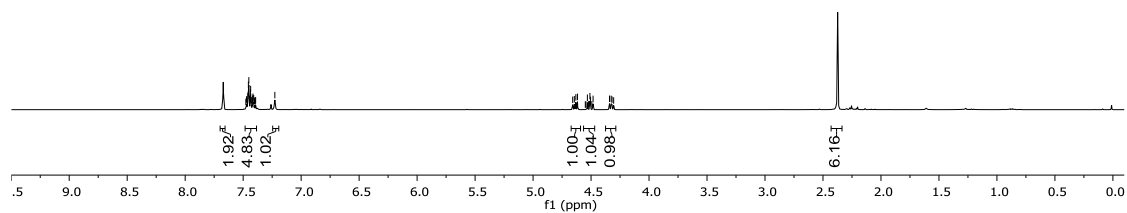

166.257  
138.242  
135.275  
131.556  
129.366  
128.947  
127.824  
127.529  
118.608  
77.377  
77.060  
76.743  
65.446  
37.589  
21.186

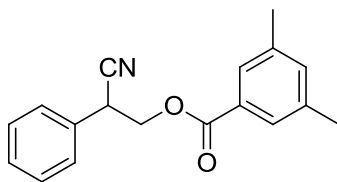

7d

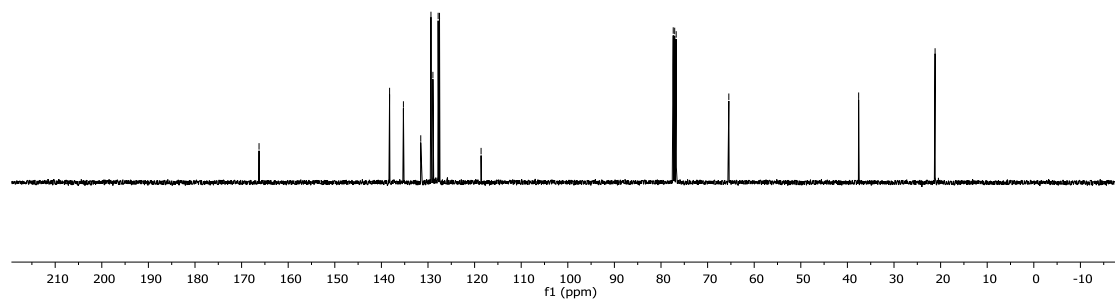



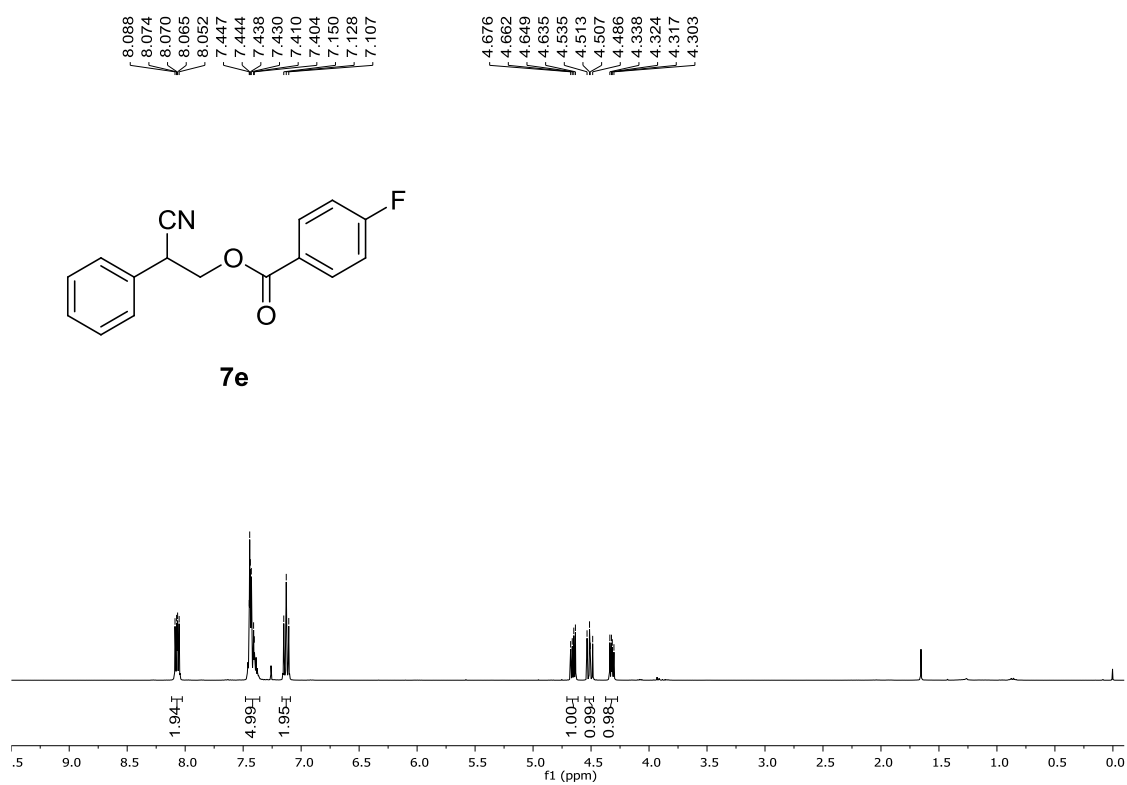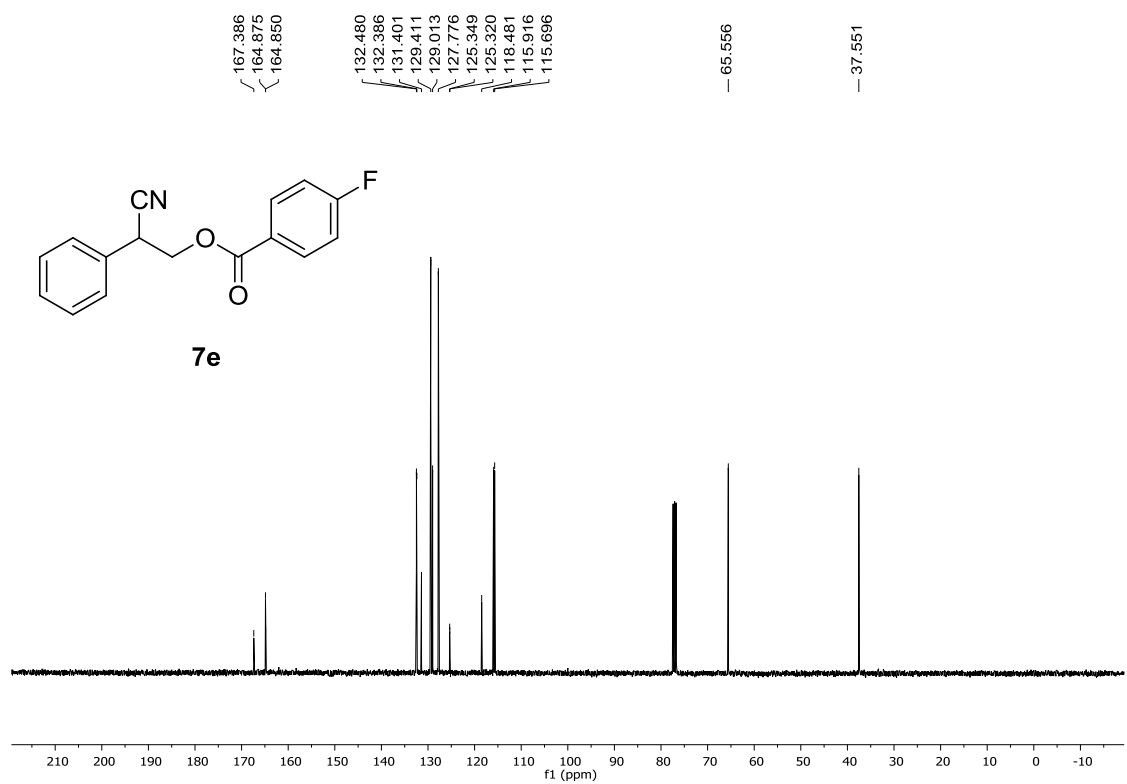

7.921  
7.915  
7.910  
7.899  
7.894  
7.888  
7.820  
7.614  
7.609  
7.604  
7.597  
7.593  
7.587  
7.453  
7.443  
7.441  
7.439  
7.432  
7.429  
7.429  
7.420  
7.416  
7.411  
7.408  
7.404  
7.402  
7.394  
7.390  
7.383  
7.379  
4.673  
4.659  
4.646  
4.632  
4.540  
4.519  
4.512  
4.491  
4.330  
4.316  
4.309  
4.295

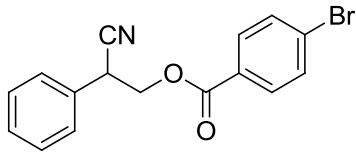

7f

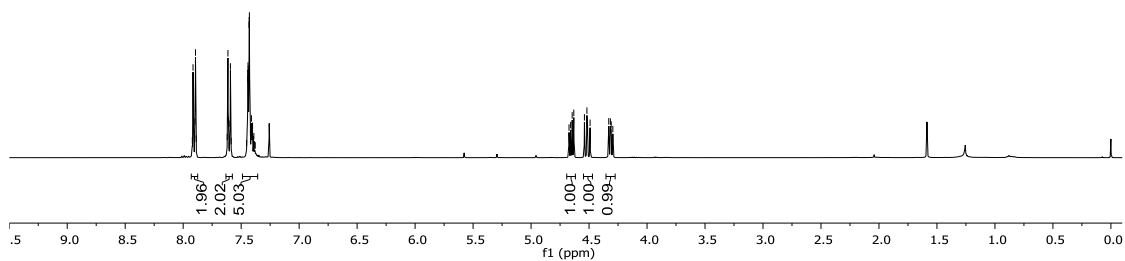

165.156  
131.969  
131.317  
131.287  
129.427  
129.046  
128.867  
127.957  
127.766  
118.397  
65.633  
37.529

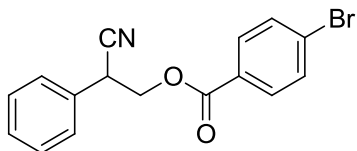

7f

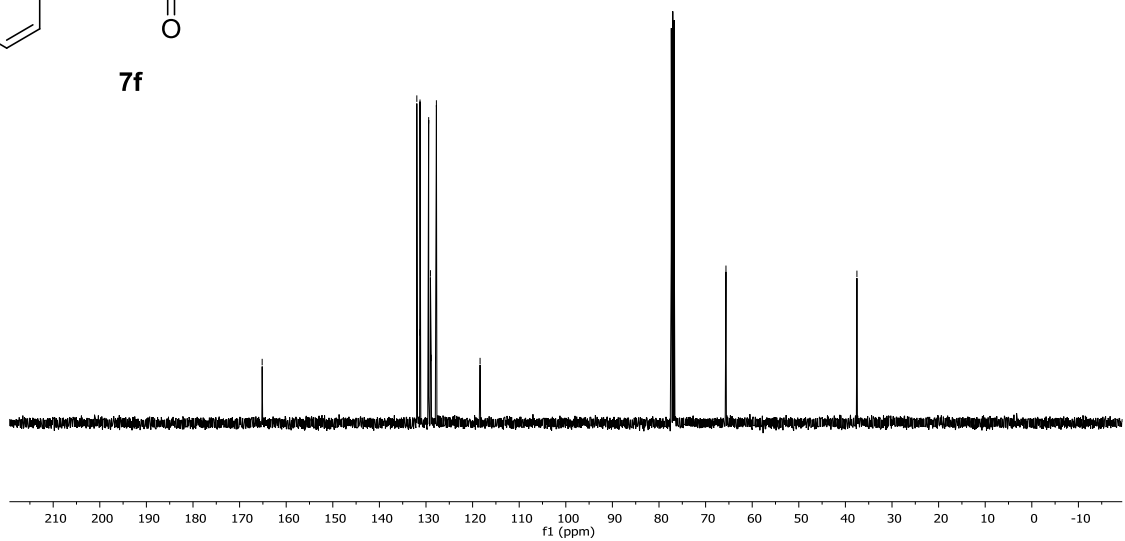

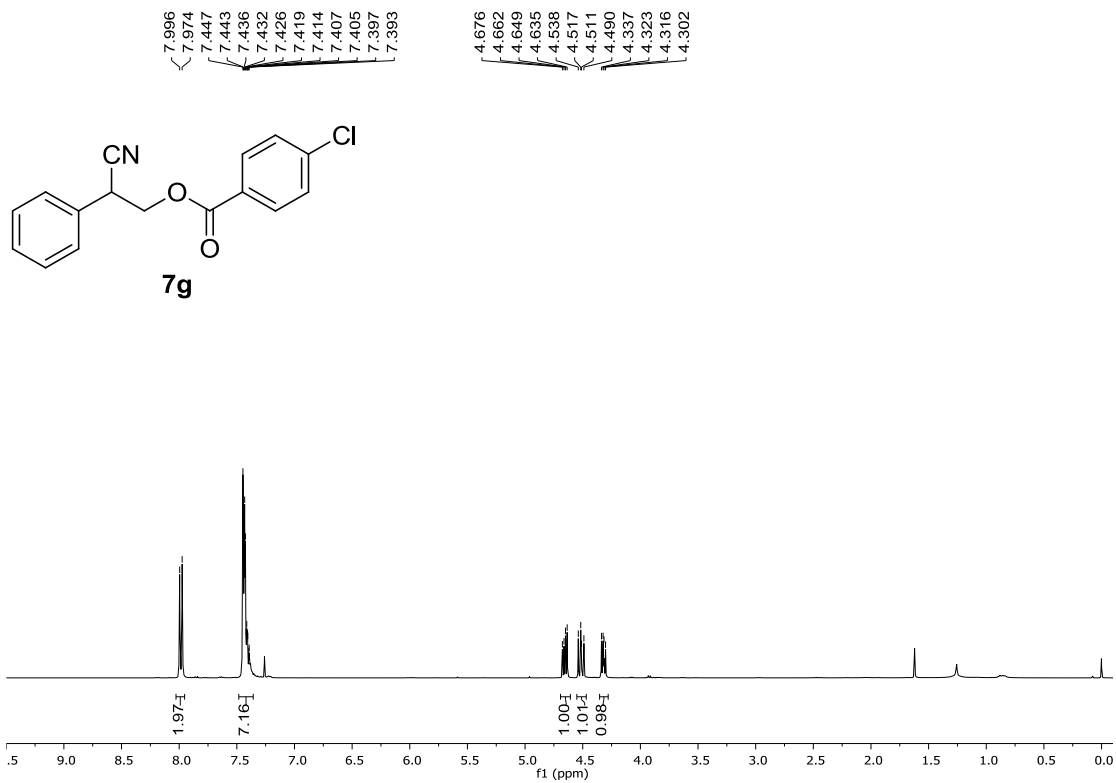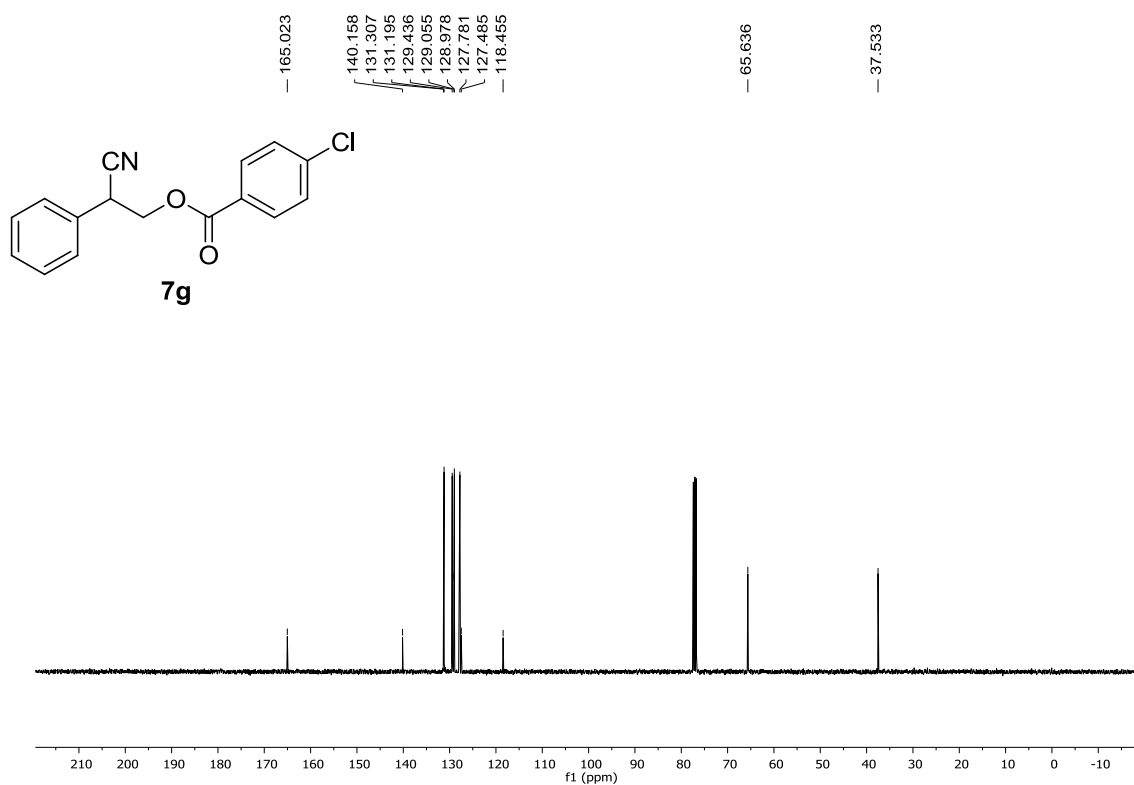

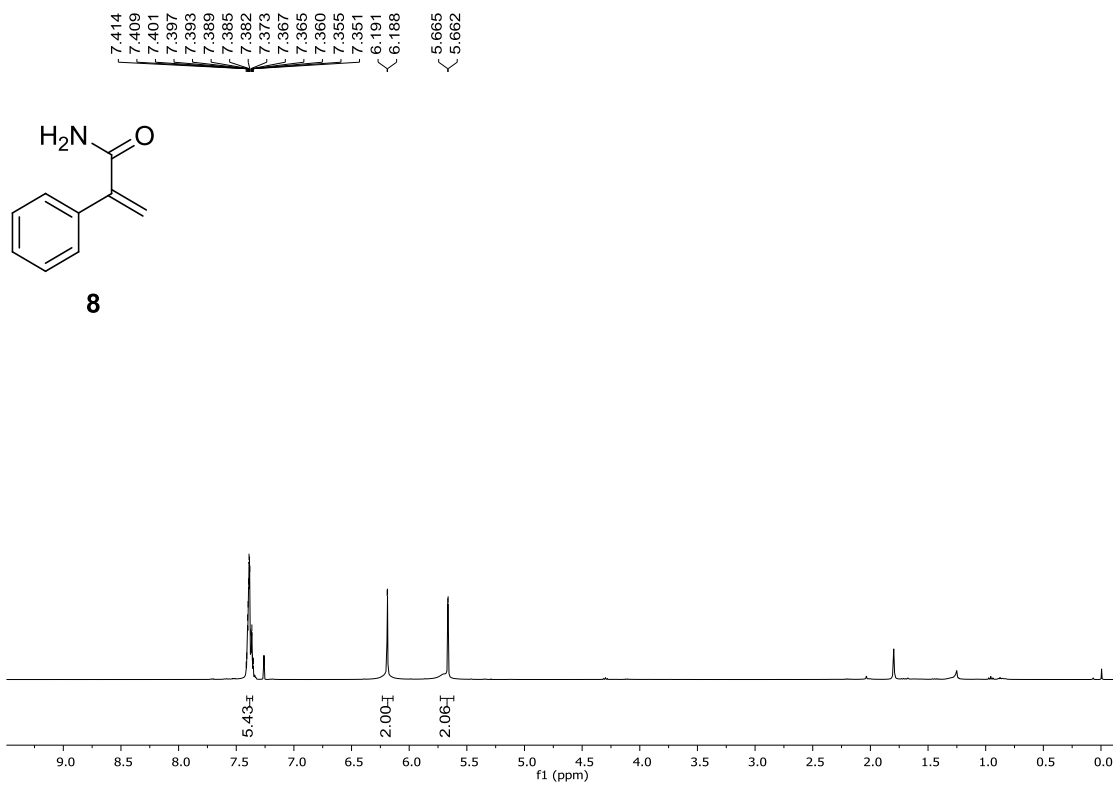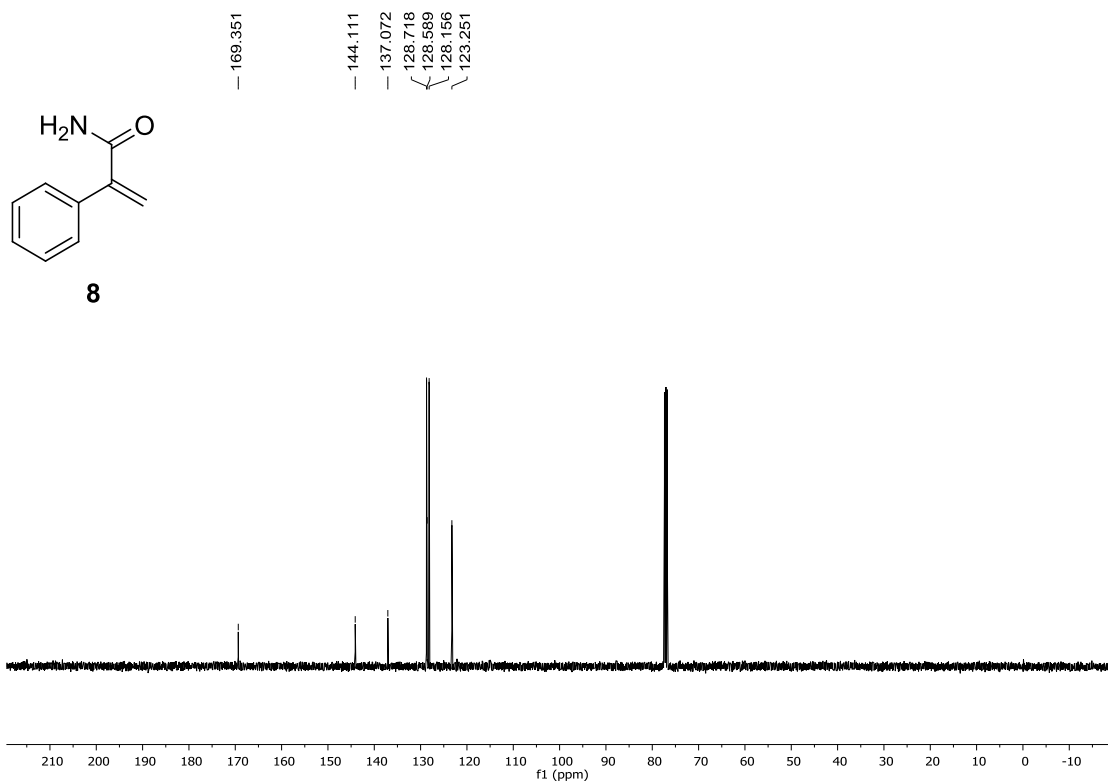

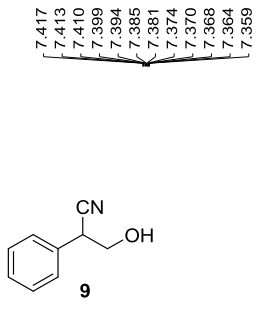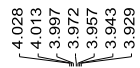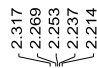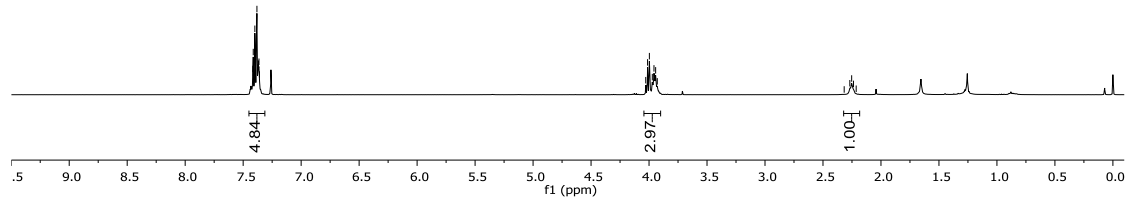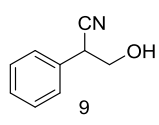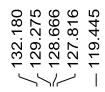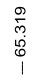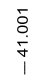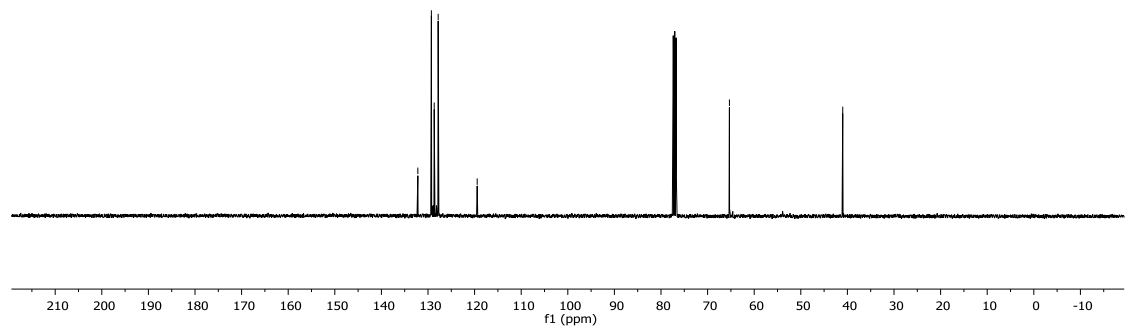

7.807  
7.804  
7.792  
7.787  
7.783  
7.641  
7.637  
7.634  
7.619  
7.614  
7.604  
7.600  
7.596  
7.493  
7.488  
7.473  
7.458  
7.454  
7.398  
7.394  
7.389  
7.376  
7.313  
7.307  
7.294  
7.290  
7.275  
7.273  
7.230  
7.226  
7.217  
7.211  
7.205  
7.197  
7.193  
7.190  
4.824  
4.804  
4.797  
4.787  
4.779  
4.770  
4.766  
4.752  
4.742  
4.728

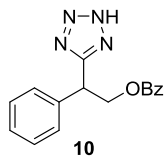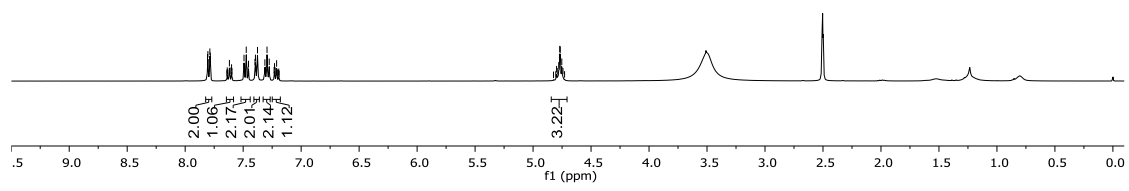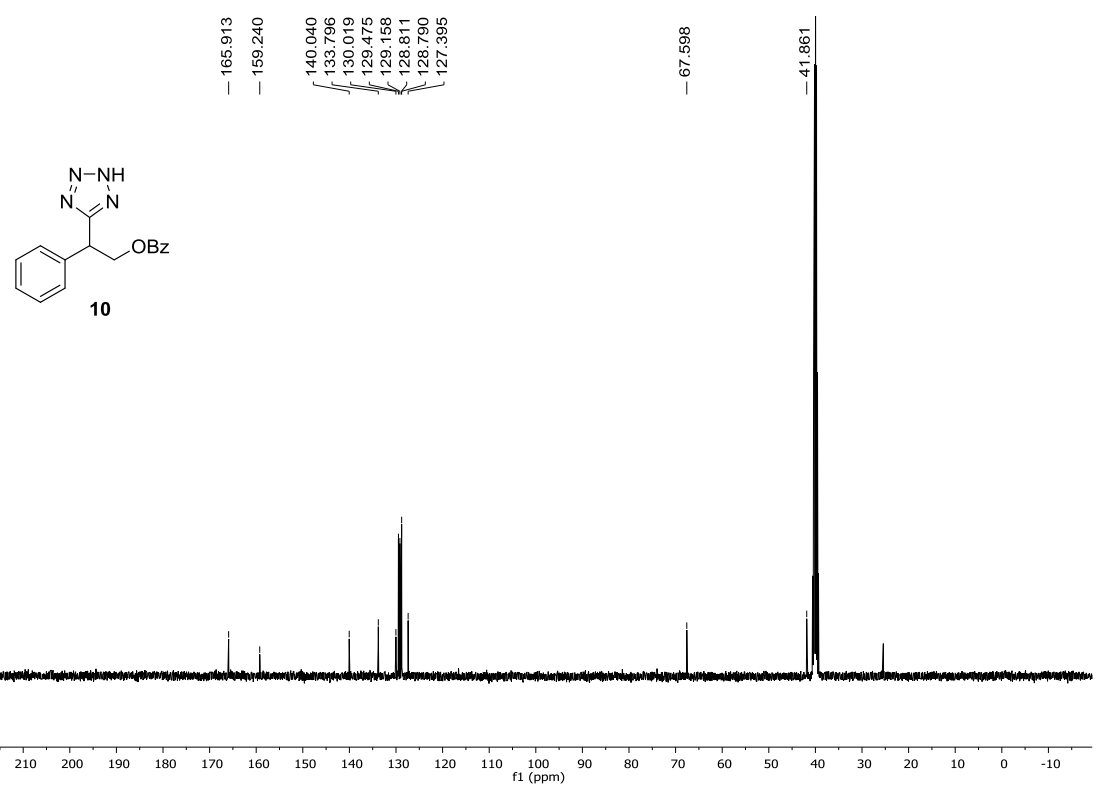

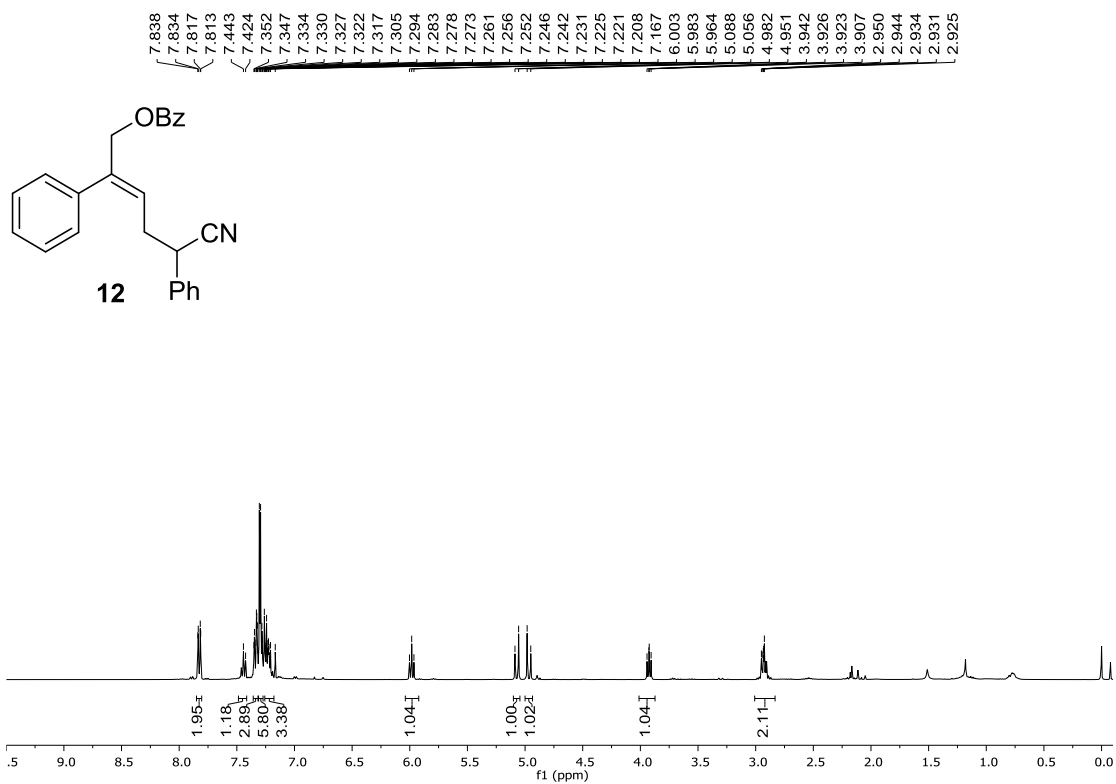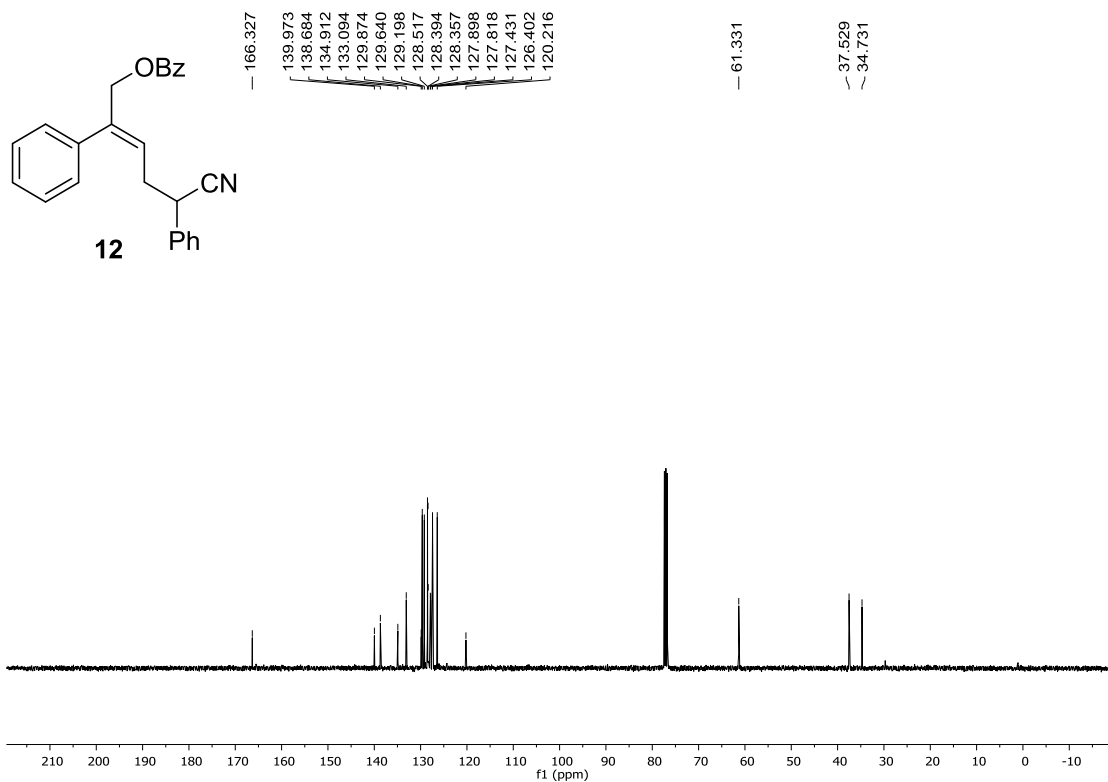

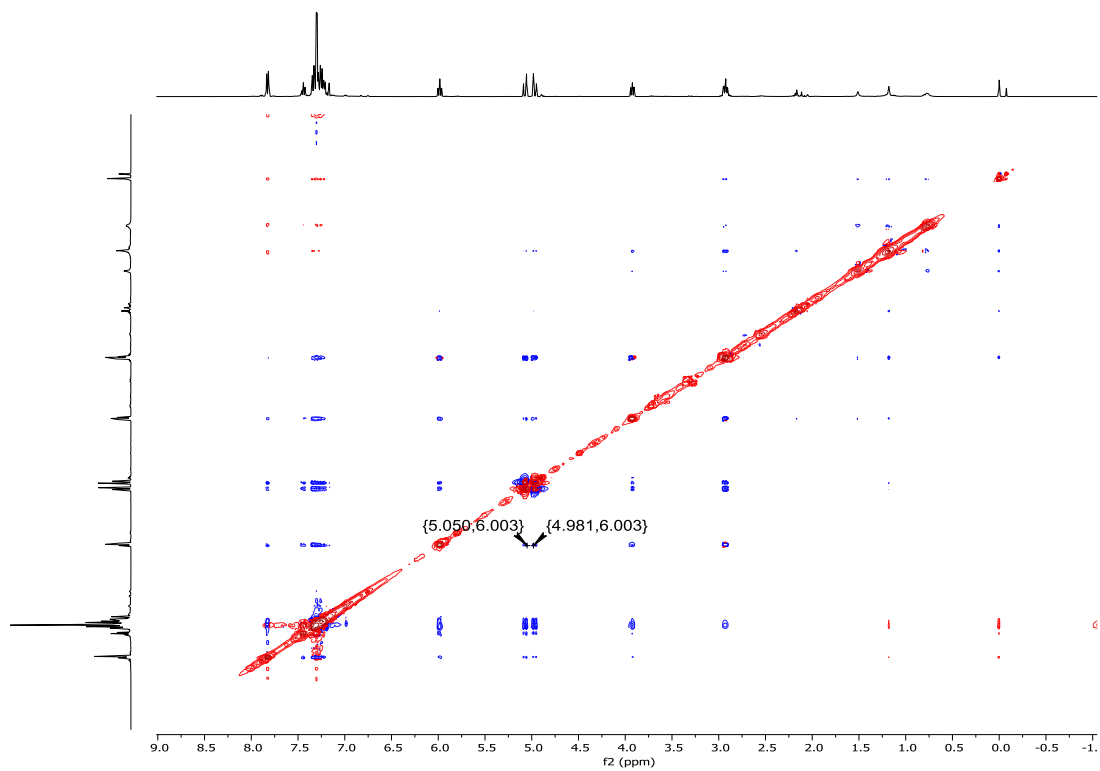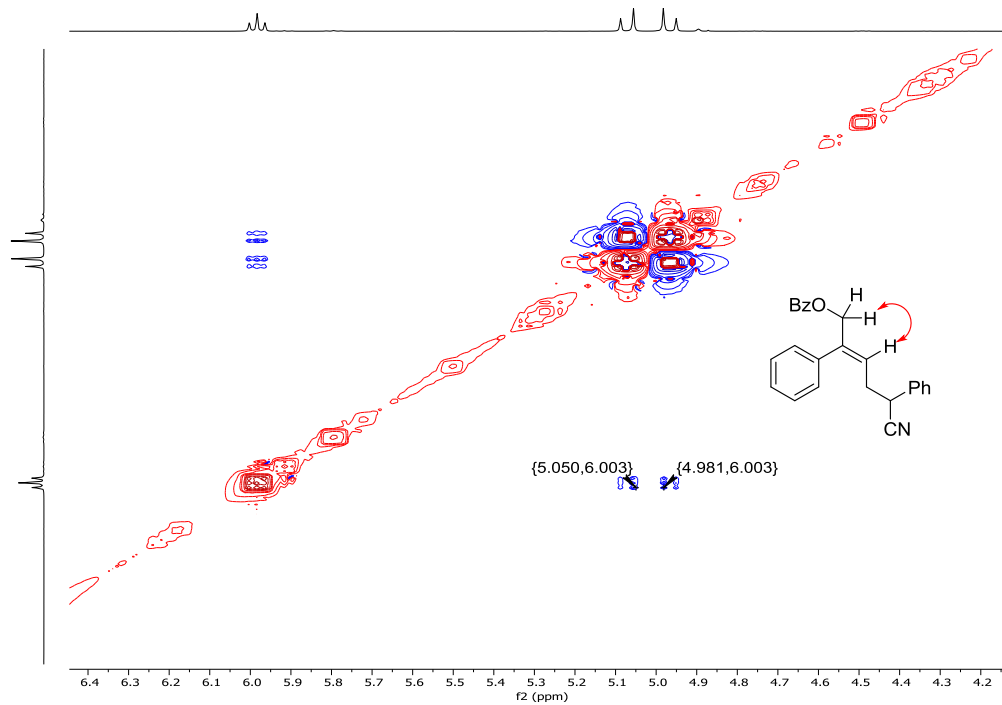

2D-NOESY spectrum of compound 12
